# Supplementary material
Source: PubMed Central journal article supplement (PMC3531918)
Supplement: NIHMS355185-supplement-Spectral_Data.pdf [file NIHMS355185-supplement-Spectral_Data.pdf]

# Supplementary Material

## The Reactivity of Human Serum Albumin towards *trans*-4-Hydroxy-2-nonenal

Qingyuan Liu, David C. Simpson, Scott Gronert\*

Department of Chemistry, Virginia Commonwealth University, Richmond, VA, USA

### Data Analysis Expanded Details

Sequest (version 28, revision 13; Thermo, San Jose, CA, USA) [1], controlled through BioWorks Browser (version 3.3.1, SP1; Thermo), was used to obtain peptide identifications from recorded tandem mass spectra (MS/MS). Scan grouping, when extracting peak lists, was disabled in all cases. For searching linear ion trap MS/MS from the LTQ XL (Thermo) instrument, average masses were used for parent ions while monoisotopic masses were used for fragment ions. For LTQ Orbitrap Velos (Thermo) data, monoisotopic masses were used for both parent and fragment ions. This approach was taken because the LTQ Orbitrap Velos system can, while the LTQ XL linear ion trap system cannot, reliably identify the monoisotopic peak. Only peptides fully conforming to digestion by trypsin were considered. Trypsin was defined as cutting to the C-terminal side of lysine and arginine except when the residue to the C-terminal side of the proposed break was proline. A maximum of two missed cleavages were allowed. For searching linear ion trap MS/MS from the LTQ XL instrument, the parent ion tolerance was set to

±2 AMU while the fragment ion tolerance for all dissociation methods was set to ±1 AMU. For Orbitrap data, the parent ion tolerance was set to ±15 ppm while the fragment ion tolerance for collision-induced dissociation (CID) fragmentation was set to ±1 AMU and for higher-energy C-trap dissociation (HCD) fragmentation was set to ±0.1 AMU (HCD MS/MS were recorded using the Orbitrap while CID MS/MS were recorded in the linear ion trap region of the LTQ Orbitrap Velos instrument). A maximum of three differential modifications were permitted for each peptide. Precise modification mass shifts are listed in Table S1 for experiments without iTRAQ labels (Applied Biosystems, Foster City, CA, USA) and in Table S2 for experiment with iTRAQ labels.

| <b>Modification Description</b>                | <b>Modification Composition</b>                                    | <b>Monoisotopic Mass Shift</b> | <b>Type</b>  |
|------------------------------------------------|--------------------------------------------------------------------|--------------------------------|--------------|
| Oxidation at Met                               | +O                                                                 | +15.994915                     | Differential |
| Iodoacetamide Alkylation at Cys                | +C <sub>2</sub> H <sub>3</sub> NO                                  | +57.021464                     | Fixed        |
| Michael Addition of HNE at Cys, Reduced        | +C <sub>9</sub> H <sub>18</sub> O <sub>2</sub><br>-[acetamide cap] | +101.109216                    | Differential |
| Michael Addition of HNE at His, Reduced        | +C <sub>9</sub> H <sub>18</sub> O <sub>2</sub>                     | +158.130680                    | Differential |
| Michael Addition of HNE at Lys, Reduced        | +C <sub>9</sub> H <sub>18</sub> O <sub>2</sub>                     | +158.130680                    | Differential |
| Schiff Base Formation with HNE at Lys, Reduced | +C <sub>9</sub> H <sub>16</sub> O                                  | +140.120115                    | Differential |

Table S1: Modification mass shifts considered in non-iTRAQ experiments

| <b>Modification Description</b>                | <b>Modification Composition</b>                                                                                                                                                                                                                                                  | <b>Monoisotopic Mass Shift</b> | <b>Type</b>  |
|------------------------------------------------|----------------------------------------------------------------------------------------------------------------------------------------------------------------------------------------------------------------------------------------------------------------------------------|--------------------------------|--------------|
| Oxidation at Met                               | +O                                                                                                                                                                                                                                                                               | +15.994915                     | Differential |
| Iodoacetamide Alkylation at Cys                | +C <sub>2</sub> H <sub>3</sub> NO                                                                                                                                                                                                                                                | +57.021464                     | Fixed        |
| iTRAQ Label at Lys                             | <sup>12</sup> C <sub>5</sub> <sup>13</sup> C <sub>2</sub> <sup>1</sup> H <sub>12</sub> <sup>14</sup> N <sub>2</sub> <sup>18</sup> O/<br>+ <sup>12</sup> C <sub>4</sub> <sup>13</sup> C <sub>3</sub> <sup>1</sup> H <sub>12</sub> <sup>14</sup> N <sup>15</sup> N <sup>16</sup> O | +144.103991 <sup>†</sup>       | Fixed        |
| iTRAQ Label at Peptide N-terminus              | <sup>12</sup> C <sub>5</sub> <sup>13</sup> C <sub>2</sub> <sup>1</sup> H <sub>12</sub> <sup>14</sup> N <sub>2</sub> <sup>18</sup> O/<br>+ <sup>12</sup> C <sub>4</sub> <sup>13</sup> C <sub>3</sub> <sup>1</sup> H <sub>12</sub> <sup>14</sup> N <sup>15</sup> N <sup>16</sup> O | +144.103991 <sup>†</sup>       | Fixed        |
| iTRAQ Label at Tyr <sup>‡</sup>                | <sup>12</sup> C <sub>5</sub> <sup>13</sup> C <sub>2</sub> <sup>1</sup> H <sub>12</sub> <sup>14</sup> N <sub>2</sub> <sup>18</sup> O/<br>+ <sup>12</sup> C <sub>4</sub> <sup>13</sup> C <sub>3</sub> <sup>1</sup> H <sub>12</sub> <sup>14</sup> N <sup>15</sup> N <sup>16</sup> O | +144.103991 <sup>†</sup>       | Differential |
| Michael Addition of HNE at Cys, Reduced        | +C <sub>9</sub> H <sub>18</sub> O <sub>2</sub><br>-[acetamide cap]                                                                                                                                                                                                               | +101.109216                    | Differential |
| Michael Addition of HNE at His, Reduced        | +C <sub>9</sub> H <sub>18</sub> O <sub>2</sub>                                                                                                                                                                                                                                   | +158.130680                    | Differential |
| Michael Addition of HNE at Lys, Reduced        | +C <sub>9</sub> H <sub>18</sub> O <sub>2</sub><br>-[iTRAQ label]                                                                                                                                                                                                                 | +14.026689                     | Differential |
| Schiff Base Formation with HNE at Lys, Reduced | +C <sub>9</sub> H <sub>16</sub> O<br>-[iTRAQ label]                                                                                                                                                                                                                              | -3.983876                      | Differential |

Table S2: Modification mass shifts considered in iTRAQ experiments; <sup>†</sup> iTRAQ label mass shift value was the average for the four tags (separation between heavy pair and light pair is circa 0.004 Da, too small to resolve with available instrumentation); <sup>‡</sup> iTRAQ label addition at tyrosine only considered with Orbitrap data and found to be uncommon

Sequest used a protein sequence database that was composed of entries for normal and reversed versions of NCBI RefSeq human sequences and the UniProt porcine trypsin sequence. NCBI RefSeq human sequences were downloaded on November 20, 2010, from [ftp://ftp.ncbi.nlm.nih.gov/refseq/H\\_sapiens/mRNA\\_Prot/human.protein.faa.gz](ftp://ftp.ncbi.nlm.nih.gov/refseq/H_sapiens/mRNA_Prot/human.protein.faa.gz), while the UniProt porcine trypsin sequence (TRYP\_PIG) was obtained on the same day from <http://www.uniprot.org/uniprot/P00761>. The final database contained 68,040 sequences (normal and reversed versions of 34,019 human and one pig protein).

Initial Sequest output was refined using the Trans-Proteomic Pipeline software package (version 4.4, VUVUZELA, revision 1, build 201010121551, MinGW; Institute for Systems Biology, Seattle, WA, USA). PeptideProphet [2] was operated in semi-

supervised mode [3] so that reversed (decoy) protein sequence entries could be used to improve discrimination between correct and incorrect identifications. At the PeptideProphet stage, repeat runs were combined and iTRAQ reporter ion intensities were extracted and corrected (using the Libra module; isotope corrections were those provided by Applied Biosystems, the iTRAQ kit manufacturer). PeptideProphet output was exported and then manipulated using Microsoft Access database software. Instances where the same MS/MS produces two identifications capable of passing the scoring threshold were removed (can occur in linear ion trap data when MS/MS are searched as potentially resulting from doubly- and triply-charged precursors).

## Results Expanded Details

MODIFICATIONS: We report modifications resulting from the exposure of human serum albumin (HSA) to *trans*-4-hydroxy-2-nonenal (HNE) at HNE:HSA ratios of 1:1 and 10:1. For both treatment ratios, five complete repeats were performed. Four were analyzed using the linear ion trap system while one was analyzed using the Orbitrap system. For each preparation, three replicate LC-MS/MS runs were collected. Therefore, a total of twelve runs were performed at each ratio using the LTQ XL and three runs were performed at each ratio using the LTQ Orbitrap Velos. In the main manuscript, Table 1 gives the modifications discovered in terms of a count of runs in which the modification in question was detected by (i) CID MS/MS using the LTQ XL, (ii) electron-transfer dissociation (ETD) MS/MS using the LTQ XL and (iii) CID MS/MS using the LTQ Orbitrap Velos. In this document, Tables S3 and S4 give the peptides that support the modification identifications given in Table 1. Results are presented as counts of runs in

which the peptide in question was detected in Table S3 and as simple detection counts in Table S4 (counts for the fragmentation methods and instrumental platforms are given in the same way as found in Table 1). Using a PeptideProphet score threshold of 0.9, 38 modified peptides were initially proposed from the LTQ XL CID scans while 31 were proposed from the LTQ XL ETD scans. After manual scrutiny, 35 peptides from the LTQ XL CID scans and 27 peptides from the LTQ XL ETD scans were accepted. Naturally, there was considerable overlap, resulting in a total of 39 accepted peptides from the LTQ XL. Using the same PeptideProphet scoring threshold, 18 modified peptides were initially identified using the LTQ Orbitrap Velos. After inspection, 17 were accepted. Example MS/MS for all accepted peptides, from all fragmentation methods and instrumental platforms, are provided at the end of this document.

| Modified Peptide (with flanking residues) | Modification Site or Sites (MA indicates Michael addition; SB indicates Schiff base formation) | Counts of LC-MS/MS runs in which the modified peptide was identified using LTQ XL CID scans (maximum = 12)/LTQ XL ETD scans (maximum = 12)/LTQ Orbitrap Velos CID scans associated with high mass accuracy Orbitrap precursor ion mass measurements (maximum = 3) |                       |
|-------------------------------------------|------------------------------------------------------------------------------------------------|-------------------------------------------------------------------------------------------------------------------------------------------------------------------------------------------------------------------------------------------------------------------|-----------------------|
|                                           |                                                                                                | 1:1 HNE to HSA Ratio                                                                                                                                                                                                                                              | 10:1 HNE to HSA Ratio |
| K.DLGEENFKALVLIIFAQYLQQC#PFEDHVK.L        | Cys-034 (MA)                                                                                   | not detected                                                                                                                                                                                                                                                      | 0/0/1                 |
| K.ALVLIFAQYLQQC#PFEDHVK.L                 | Cys-034 (MA)                                                                                   | 9/1/0                                                                                                                                                                                                                                                             | 9/3/3                 |
| K.SLH@TLFGDK.L                            | His-067 (MA)                                                                                   | 12/0/3                                                                                                                                                                                                                                                            | 12/5/3                |
| K.SLHTLFGDK^LCTVATLR.E                    | Lys-073 (MA)                                                                                   | not detected                                                                                                                                                                                                                                                      | 3/0/0                 |
| R.NECFLQHK~DDPNLPR.L                      | Lys-106 (SB)                                                                                   | not detected                                                                                                                                                                                                                                                      | 0/1/0                 |
| R.LVRPEVDVMCTAFH@DNEETFLK.K               | His-128 (MA)                                                                                   | 0/2/0                                                                                                                                                                                                                                                             | 2/3/0                 |
| K.K^YLYEIAR.R                             | Lys-137 (MA)                                                                                   | not detected                                                                                                                                                                                                                                                      | 1/0/0                 |
| R.RH@PYFYAPELFFAK.R                       | His-146 (MA)                                                                                   | 12/11/0                                                                                                                                                                                                                                                           | 12/12/3               |
| R.RH@PYFYAPELFFAKR.Y                      | His-146 (MA)                                                                                   | not detected                                                                                                                                                                                                                                                      | 1/0/0                 |
| R.RH@PYFYAPELFFAK^R.Y                     | His-146 (MA) & Lys-159 (MA)                                                                    | not detected                                                                                                                                                                                                                                                      | 0/2/1                 |
| R.YK^AAFTECCQAADK.A                       | Lys-162 (MA)                                                                                   | not detected                                                                                                                                                                                                                                                      | 12/2/2                |
| R.YK~AAFTECCQAADK.A                       | Lys-162 (SB)                                                                                   | not detected                                                                                                                                                                                                                                                      | 10/1/0                |
| R.LK^CASLQK.F                             | Lys-199 (MA)                                                                                   | 6/0/2                                                                                                                                                                                                                                                             | 11/0/3                |
| R.AFK^AWAVAR.L                            | Lys-212 (MA)                                                                                   | not detected                                                                                                                                                                                                                                                      | 12/0/1                |
| K.AEFAEVSK^LVTDLTK.V                      | Lys-233 (MA)                                                                                   | not detected                                                                                                                                                                                                                                                      | 9/4/0                 |
| K.LVTDLTK^VH@TECCHGDLLCADDR.A             | Lys-240 (MA) & His-242 (MA)                                                                    | 8/0/0                                                                                                                                                                                                                                                             | 3/0/0                 |
| K.VH@TECCHGDLLCADDR.A                     | His-242 (MA)                                                                                   | 0/7/0                                                                                                                                                                                                                                                             | 0/7/0                 |
| K.VH@TECCH@GDLLCADDR.A                    | His-242 (MA) & His-247 (MA)                                                                    | not detected                                                                                                                                                                                                                                                      | 9/4/0                 |
| K.VH@TECCH@GDLLCADDRADLAK.Y               | His-242 (MA) & His-247 (MA)                                                                    | not detected                                                                                                                                                                                                                                                      | 3/7/0                 |
| R.ADLAK^YICENQDSISSK.L                    | Lys-262 (MA)                                                                                   | not detected                                                                                                                                                                                                                                                      | 5/3/0                 |
| K.SH@CIAEVENDEMPADLPSLAADFVESK.D          | His-288 (MA)                                                                                   | 10/0/0                                                                                                                                                                                                                                                            | 12/1/3                |
| K.SH@CIAEVENDEM^PADLPSLAADFVESK.D         | His-288 (MA)                                                                                   | 1/0/0                                                                                                                                                                                                                                                             | 11/1/1                |
| R.RH@PDYSVLLLR.L                          | His-338 (MA)                                                                                   | 4/0/0                                                                                                                                                                                                                                                             | 12/3/3                |
| R.H@PDYSVLLLR.L                           | His-338 (MA)                                                                                   | not detected                                                                                                                                                                                                                                                      | 2/0/0                 |
| R.H@PDYSVLLLR.LAKTYETTLEK.C               | His-338 (MA)                                                                                   | 0/6/0                                                                                                                                                                                                                                                             | 1/9/0                 |
| R.LAK^TYETTLEK.C                          | Lys-351 (MA)                                                                                   | 10/0/0                                                                                                                                                                                                                                                            | 9/0/0                 |
| R.LAK~TYETTLEK.C                          | Lys-351 (SB)                                                                                   | not detected                                                                                                                                                                                                                                                      | 3/1/0                 |
| K.TYETTLEK^CCAAADPHECYAK.V                | Lys-359 (MA)                                                                                   | not detected                                                                                                                                                                                                                                                      | 1/3/0                 |
| K.CCAAADPH@ECYAK.V                        | His-367 (MA)                                                                                   | not detected                                                                                                                                                                                                                                                      | 9/0/0                 |
| K.VFDEFK^PLVEEPQNLIK.Q                    | Lys-378 (MA)                                                                                   | not detected                                                                                                                                                                                                                                                      | 5/1/0                 |
| K.QNCELFEQLGEYK^FQNALLVR.Y                | Lys-402 (MA)                                                                                   | not detected                                                                                                                                                                                                                                                      | 4/0/2                 |
| K.K^VPQVSTPTLVEVSR.N                      | Lys-414 (MA)                                                                                   | not detected                                                                                                                                                                                                                                                      | 11/1/3                |
| K.K~VPQVSTPTLVEVSR.N                      | Lys-414 (SB)                                                                                   | 8/0/0                                                                                                                                                                                                                                                             | 12/1/3                |
| R.VTK^CCTESLVNR.R                         | Lys-475 (MA)                                                                                   | not detected                                                                                                                                                                                                                                                      | 1/0/0                 |
| K.EFNAETFTFH@ADICTLSEK.E                  | His-510 (MA)                                                                                   | 1/8/0                                                                                                                                                                                                                                                             | 12/11/0               |
| K.EFNAETFTFHADICTLSEK^ER.Q                | Lys-519 (MA)                                                                                   | not detected                                                                                                                                                                                                                                                      | 1/0/0                 |
| K.K^QTALVELVK.H                           | Lys-525 (MA)                                                                                   | not detected                                                                                                                                                                                                                                                      | 0/1/3                 |
| K.K~QTALVELVK.H                           | Lys-525 (SB)                                                                                   | 3/0/3                                                                                                                                                                                                                                                             | 8/3/3                 |
| K.EQLK^AVMDDFAAFVEK.C                     | Lys-545 (MA)                                                                                   | 4/7/0                                                                                                                                                                                                                                                             | 11/11/3               |
| K.EQLK~AVMDDFAAFVEK.C                     | Lys-545 (SB)                                                                                   | not detected                                                                                                                                                                                                                                                      | 4/7/0                 |

Table S3: Counts of LC-MS/MS runs in which the indicated modified peptide was identified. The PeptideProphet score threshold was 0.9. Five independent preparations were made for each HNE:HSA ratio. For each ratio, four preparations were analyzed using a Thermo LTQ XL linear ion trap mass spectrometer and one preparation was analyzed using a Thermo LTQ Orbitrap Velos instrument. In all cases, three replicate LC-MS/MS runs were recorded for each preparation. For the LTQ XL runs, one collision-induced dissociation (CID) and one electron-transfer dissociation (ETD) MS/MS were recorded for each precursor ion selected for fragmentation; resulting CID and ETD spectrum counts are presented separately. For the LTQ Orbitrap Velos runs, only CID MS/MS were recorded. C# indicates HNE Michael addition at Cys followed by reduction; H@ indicates HNE Michael addition at His followed by reduction; K^ indicates HNE Michael addition at Lys followed by reduction; K~ indicates Schiff base formation with HNE at Lys followed by reduction; M\* indicates oxidation at Met.

| Modified Peptide (with flanking residues) | Modification Site or Sites (MA indicates Michael addition; SB indicates Schiff base formation) | Counts of spectra that passed the PeptideProphet score threshold obtained using LTQ XL CID scans (from 12 LC-MS/MS runs)/LTQ XL ETD scans (from 12 LC-MS/MS runs)/LTQ Orbitrap Velos CID scans associated with high mass accuracy Orbitrap precursor ion mass measurements (from 3 LC-MS/MS runs) |                       |
|-------------------------------------------|------------------------------------------------------------------------------------------------|---------------------------------------------------------------------------------------------------------------------------------------------------------------------------------------------------------------------------------------------------------------------------------------------------|-----------------------|
|                                           |                                                                                                | 1:1 HNE to HSA Ratio                                                                                                                                                                                                                                                                              | 10:1 HNE to HSA Ratio |
| K.DLGEENFKALVLIQFAQYLQQC#PFEDHVK.L        | Cys-034 (MA)                                                                                   | not detected                                                                                                                                                                                                                                                                                      | 0/0/1                 |
| K.ALVLIAFAQYLQQC#PFEDHVK.L                | Cys-034 (MA)                                                                                   | 13/1/0                                                                                                                                                                                                                                                                                            | 16/3/10               |
| K.SLH@TLFGDK.L                            | His-067 (MA)                                                                                   | 16/0/8                                                                                                                                                                                                                                                                                            | 68/23/30              |
| K.SLHTLFGDK^LCTVATLR.E                    | Lys-073 (MA)                                                                                   | not detected                                                                                                                                                                                                                                                                                      | 3/0/0                 |
| R.NECFLQHK-DDNPNLPR.L                     | Lys-106 (SB)                                                                                   | not detected                                                                                                                                                                                                                                                                                      | 0/1/0                 |
| R.LVRPEVDVMCTAFH@DNEETFLK.K               | His-128 (MA)                                                                                   | 0/2/0                                                                                                                                                                                                                                                                                             | 2/4/0                 |
| K.K^YLYEIAR.R                             | Lys-137 (MA)                                                                                   | not detected                                                                                                                                                                                                                                                                                      | 1/0/0                 |
| R.RH@PYFYAPELFFAK.R                       | His-146 (MA)                                                                                   | 27/24/0                                                                                                                                                                                                                                                                                           | 157/130/26            |
| R.RH@PYFYAPELFFAKR.Y                      | His-146 (MA)                                                                                   | not detected                                                                                                                                                                                                                                                                                      | 1/0/0                 |
| R.RH@PYFYAPELFFAK^R.Y                     | His-146 (MA) & Lys-159 (MA)                                                                    | not detected                                                                                                                                                                                                                                                                                      | 0/2/1                 |
| R.YK^AAFTECCQAADK.A                       | Lys-162 (MA)                                                                                   | not detected                                                                                                                                                                                                                                                                                      | 20/2/4                |
| R.YK-AAFTECCQAADK.A                       | Lys-162 (SB)                                                                                   | not detected                                                                                                                                                                                                                                                                                      | 10/1/0                |
| R.LK^CASLQK.F                             | Lys-199 (MA)                                                                                   | 6/0/4                                                                                                                                                                                                                                                                                             | 11/0/6                |
| R.AFK^AWAVAR.L                            | Lys-212 (MA)                                                                                   | not detected                                                                                                                                                                                                                                                                                      | 12/0/2                |
| K.AEFAEVSK^LVTDLTK.V                      | Lys-233 (MA)                                                                                   | not detected                                                                                                                                                                                                                                                                                      | 9/4/0                 |
| K.LVTDLTK^VH@TECCHGDLLCADDR.A             | Lys-240 (MA) & His-242 (MA)                                                                    | 8/0/0                                                                                                                                                                                                                                                                                             | 3/0/0                 |
| K.VH@TECCHGDLLCADDR.A                     | His-242 (MA)                                                                                   | 0/7/0                                                                                                                                                                                                                                                                                             | 0/10/0                |
| K.VH@TECCH@GDLLCADDR.A                    | His-242 (MA) & His-247 (MA)                                                                    | not detected                                                                                                                                                                                                                                                                                      | 11/4/0                |
| K.VH@TECCH@GDLLCADDRADLAK.Y               | His-242 (MA) & His-247 (MA)                                                                    | not detected                                                                                                                                                                                                                                                                                      | 3/7/0                 |
| R.ADLAK^YICENQDSISSK.L                    | Lys-262 (MA)                                                                                   | not detected                                                                                                                                                                                                                                                                                      | 6/3/0                 |
| K.SH@CIAEVENDEMPADLPSLAADFVESK.D          | His-288 (MA)                                                                                   | 10/0/0                                                                                                                                                                                                                                                                                            | 86/8/6                |
| K.SH@CIAEVENDEM^PADLPSLAADFVESK.D         | His-288 (MA)                                                                                   | 1/0/0                                                                                                                                                                                                                                                                                             | 16/2/1                |
| R.RH@PDYSVLLLR.L                          | His-338 (MA)                                                                                   | 4/0/0                                                                                                                                                                                                                                                                                             | 46/3/21               |
| R.H@PDYSVLLLR.L                           | His-338 (MA)                                                                                   | not detected                                                                                                                                                                                                                                                                                      | 2/0/0                 |
| R.H@PDYSVLLLR^LAKTYETLEK.C                | His-338 (MA)                                                                                   | 0/6/0                                                                                                                                                                                                                                                                                             | 1/9/0                 |
| R.LAK^TYETLEK.C                           | Lys-351 (MA)                                                                                   | 10/0/0                                                                                                                                                                                                                                                                                            | 9/0/0                 |
| R.LAK-TYETLEK.C                           | Lys-351 (SB)                                                                                   | not detected                                                                                                                                                                                                                                                                                      | 3/1/0                 |
| K.TYETLEK^CCAAADPHECYAK.V                 | Lys-359 (MA)                                                                                   | not detected                                                                                                                                                                                                                                                                                      | 1/3/0                 |
| K.CCAAADPH@ECYAK.V                        | His-367 (MA)                                                                                   | not detected                                                                                                                                                                                                                                                                                      | 9/0/0                 |
| K.VFDEFK^PLVEEPQNLIK.Q                    | Lys-378 (MA)                                                                                   | not detected                                                                                                                                                                                                                                                                                      | 5/1/0                 |
| K.QNCELFEQLGEYK^FQNALLVR.Y                | Lys-402 (MA)                                                                                   | not detected                                                                                                                                                                                                                                                                                      | 4/0/4                 |
| K.K^VPQVSTPTLVEVSR.N                      | Lys-414 (MA)                                                                                   | not detected                                                                                                                                                                                                                                                                                      | 25/4/5                |
| K.K-VPQVSTPTLVEVSR.N                      | Lys-414 (SB)                                                                                   | 8/0/0                                                                                                                                                                                                                                                                                             | 36/4/17               |
| R.VTK^CCTESLVNR.R                         | Lys-475 (MA)                                                                                   | not detected                                                                                                                                                                                                                                                                                      | 1/0/0                 |
| K.EFNAETFFH@ADICTLSEK.E                   | His-510 (MA)                                                                                   | 1/8/0                                                                                                                                                                                                                                                                                             | 20/21/0               |
| K.EFNAETFFHADICTLSEK^ER.Q                 | Lys-519 (MA)                                                                                   | not detected                                                                                                                                                                                                                                                                                      | 1/0/0                 |
| K.K^QTALVELVK.H                           | Lys-525 (MA)                                                                                   | not detected                                                                                                                                                                                                                                                                                      | 0/1/7                 |
| K.K-QTALVELVK.H                           | Lys-525 (SB)                                                                                   | 3/0/8                                                                                                                                                                                                                                                                                             | 8/5/17                |
| K.EQLK^AVMDDFAAFVEK.C                     | Lys-545 (MA)                                                                                   | 4/7/0                                                                                                                                                                                                                                                                                             | 19/21/6               |
| K.EQLK-AVMDDFAAFVEK.C                     | Lys-545 (SB)                                                                                   | not detected                                                                                                                                                                                                                                                                                      | 4/7/0                 |

Table S4: Counts of MS/MS supporting the indicated modified peptides. The PeptideProphet score threshold was 0.9. Five independent preparations were made for each HNE:HSA ratio. For each ratio, four preparations were analyzed using a Thermo LTQ XL linear ion trap mass spectrometer and one preparation was analyzed using a Thermo LTQ Orbitrap Velos instrument. In all cases, three replicate LC-MS/MS runs were recorded for each preparation. For the LTQ XL runs, one collision-induced dissociation (CID) and one electron-transfer dissociation (ETD) MS/MS were recorded for each precursor ion selected for fragmentation; resulting CID and ETD spectrum counts are presented separately. For the LTQ Orbitrap Velos runs, only CID MS/MS were recorded. C# indicates HNE Michael addition at Cys followed by reduction; H@ indicates HNE Michael addition at His followed by reduction; K^ indicates HNE Michael addition at Lys followed by reduction; K- indicates Schiff base formation with HNE at Lys followed by reduction; M\* indicates oxidation at Met.

MASS LIST: Measurements of iTRAQ reporter ion intensities obtained using pulsed-Q dissociation (PQD) in a linear ion trap system are not very precise, so a targeted mass list was used to increase the number of measurements obtained. The targeted mass list was also used for iTRAQ experiments performed using the LTQ Orbitrap Velos instrument. Those peptides that appeared to be most important from the initial survey runs and from previously published studies [4,5] were included in the mass list. The mass list contains  $m/z$  ratios for singly-, doubly- and triply-charged ions falling within the analyzed  $m/z$  window (300–2000). Both modified peptides and unmodified versions of the same peptide were included. In cases where HNE addition was indicated at lysine, the full length peptide, which now contains a missed cleavage, and the two shorter peptides covering the same sequence that would result from cleavage with trypsin were included (provided they were long enough to be efficiently detected). The mass list was constructed with the aim of covering eighteen modification sites and contained 138 entries. The  $m/z$  ratio window around the listed masses that was accepted was  $\pm 2$ . Approximately 27% of the  $m/z$  ratio window from which precursor ions were selected was covered. The complete targeted mass list is presented as Table S5 while a shorter list of targeted modified peptides is provided as Table 2 in the main manuscript.



| Modification Site or Modification Site(s)<br>Associated with Unmodified Peptide (MA<br>indicates Michael addition; SB indicates<br>Schiff base formation) | Peptide                                    | Mass List Constituents |                      |                      |
|-----------------------------------------------------------------------------------------------------------------------------------------------------------|--------------------------------------------|------------------------|----------------------|----------------------|
|                                                                                                                                                           |                                            | [M+H] <sup>+</sup>     | [M+2H] <sup>2+</sup> | [M+3H] <sup>3+</sup> |
| Cys-034 (MA)                                                                                                                                              | ALVLIIFAQYLQQC#PFEDHVK                     | 2879.60                | 1440.31              | 960.54               |
| Cys-034-associated                                                                                                                                        | ALVLIIFAQYLQQCPFEDHVK                      | 2778.49                | 1389.75              | 926.84               |
| Lys-051 (MA)                                                                                                                                              | LVNEVTEFAK <sup>+</sup> TCVAD              | 1998.06                | 999.53               | 666.69               |
| Lys-051-associated                                                                                                                                        | LVNEVTEFAKTCVAD                            | 1984.03                | 992.52               | 662.02               |
| Lys-051-associated                                                                                                                                        | LVNEVTEFAK                                 | 1437.82                | 719.42               | 479.95               |
| Lys-051-associated                                                                                                                                        | TCVAD                                      | 709.33                 | 355.17               | 237.12               |
| His-067 (MA)                                                                                                                                              | SLH@TLFGDK                                 | 1463.88                | 732.44               | 488.63               |
| His-067-associated                                                                                                                                        | SLHTLFGDK                                  | 1305.74                | 653.38               | 435.92               |
| His-105 (MA)                                                                                                                                              | NECFLQH@K                                  | 1521.84                | 761.42               | 507.95               |
| His-105-associated                                                                                                                                        | NECFLQHK                                   | 1363.71                | 682.36               | 455.24               |
| Lys-162 (MA)                                                                                                                                              | YK <sup>+</sup> AAFTECCQAADK               | 2109.06                | 1055.04              | 703.69               |
| Lys-162-associated                                                                                                                                        | YKAAFTECCQAADK                             | 2095.04                | 1048.02              | 699.02               |
| Lys-162-associated                                                                                                                                        | AAFTECCQAADK                               | 1659.78                | 830.39               | 553.93               |
| Lys-199 (MA)                                                                                                                                              | LK <sup>+</sup> CASLQK                     | 1393.87                | 697.44               | 465.30               |
| Lys-199-associated                                                                                                                                        | LKCASLQK                                   | 1379.85                | 690.43               | 460.62               |
| Lys-199-associated                                                                                                                                        | CASLQK                                     | 994.56                 | 497.79               | 332.19               |
| Lys-212 (MA)                                                                                                                                              | AFK <sup>+</sup> AWAVAR                    | 1321.81                | 661.41               | 441.28               |
| Lys-212-associated                                                                                                                                        | AFKAWAVAR                                  | 1307.79                | 654.40               | 436.60               |
| Lys-212-associated                                                                                                                                        | AWAVAR                                     | 817.48                 | 409.25               | 273.17               |
| Lys-233 (MA)                                                                                                                                              | AEFAEVSK <sup>+</sup> LVTDLTK              | 2097.23                | 1049.12              | 699.75               |
| Lys-233-associated                                                                                                                                        | AEFAEVSKLVTDLTK                            | 2083.21                | 1042.11              | 695.07               |
| Lys-233-associated                                                                                                                                        | AEFAEVSK                                   | 1168.65                | 584.83               | 390.22               |
| Lys-233-associated                                                                                                                                        | LVTDLTK                                    | 1077.68                | 539.34               | 359.90               |
| His-242 (MA)                                                                                                                                              | VH@TECCHGDLLECADDR                         | 2389.07                | 1195.04              | 797.03               |
| His-247 (MA)                                                                                                                                              | VHTECCH@GDLLECADDR                         | 2389.07                | 1195.04              | 797.03               |
| His-242-associated & His-247-associated                                                                                                                   | VHTECCHGDLLECADDR                          | 2230.94                | 1115.97              | 744.32               |
| Lys-262 (MA)                                                                                                                                              | ADLAK <sup>+</sup> YICENQDSISSK            | 2388.26                | 1194.63              | 796.76               |
| Lys-262-associated                                                                                                                                        | ADLAKYICENQDSISSK                          | 2374.23                | 1187.62              | 792.08               |
| Lys-262-associated                                                                                                                                        | ADLAK                                      | 805.51                 | 403.26               | 269.17               |
| Lys-262-associated                                                                                                                                        | YICENQDSISSK                               | 1731.85                | 866.43               | 577.96               |
| His-288 (MA)                                                                                                                                              | SH@CIAEVENDEM <sup>*</sup> PADLPSLAADFVESK | 3436.68                | 1718.84              | 1146.23              |
| His-288 (MA)                                                                                                                                              | SH@CIAEVENDEMPADLPSLAADFVESK               | 3420.68                | 1710.85              | 1140.90              |
| His-288-associated                                                                                                                                        | SHCIAEVENDEM <sup>*</sup> PADLPSLAADFVESK  | 3278.55                | 1639.78              | 1093.52              |
| His-288-associated                                                                                                                                        | SHCIAEVENDEMPADLPSLAADFVESK                | 3262.55                | 1631.78              | 1088.19              |
| Lys-351 (MA)                                                                                                                                              | LAK <sup>+</sup> TYETTLEK                  | 1743.04                | 872.03               | 581.69               |
| Lys-351-associated                                                                                                                                        | LAKTYETTLEK                                | 1729.02                | 865.01               | 577.01               |
| Lys-351-associated                                                                                                                                        | TYETTLEK                                   | 1272.70                | 636.85               | 424.90               |
| His-367 (MA)                                                                                                                                              | CCAAADPH@ECYAK                             | 1998.94                | 999.97               | 666.98               |
| His-367-associated                                                                                                                                        | CCAAADPHECYAK                              | 1840.81                | 920.91               | 614.27               |
| Lys-378 (MA)                                                                                                                                              | VFDEFK <sup>+</sup> PLVEEPQNLIK            | 2491.43                | 1246.22              | 831.15               |
| Lys-378-associated                                                                                                                                        | VFDEFKPLVEEPQNLIK                          | 2477.41                | 1239.21              | 826.47               |
| Lys-378-associated                                                                                                                                        | VFDEFK                                     | 1072.60                | 536.80               | 358.20               |
| Lys-378-associated                                                                                                                                        | PLVEEPQNLIK                                | 1567.93                | 784.47               | 523.32               |
| Residue 403-410 peptide                                                                                                                                   | FQNALLVR                                   | 1104.67                | 552.84               | 368.89               |
| Lys-414 (MA)                                                                                                                                              | K <sup>+</sup> VPQVSTPTLVEVSR              | 1942.17                | 971.59               | 648.06               |
| Lys-414 (SB)                                                                                                                                              | K~VPQVSTPTLVEVSR                           | 1924.16                | 962.59               | 642.06               |
| Lys-414-associated                                                                                                                                        | KVPQVSTPTLVEVSR                            | 1928.15                | 964.58               | 643.39               |
| Lys-414-associated                                                                                                                                        | VPQVSTPTLVEVSR                             | 1655.95                | 828.48               | 552.65               |
| His-510 (MA)                                                                                                                                              | EFNAETFFH@ADICTLSEK                        | 2706.36                | 1353.68              | 902.79               |
| His-510-associated                                                                                                                                        | EFNAETFFHADICTLSEK                         | 2548.23                | 1274.62              | 850.08               |
| Lys-525 (MA)                                                                                                                                              | K <sup>+</sup> QTALVELVK                   | 1575.04                | 788.02               | 525.68               |
| Lys-525 (SB)                                                                                                                                              | K~QTALVELVK                                | 1557.03                | 779.02               | 519.68               |
| Lys-525-associated                                                                                                                                        | KQTALVELVK                                 | 1561.01                | 781.01               | 521.01               |
| Lys-525-associated                                                                                                                                        | QTALVELVK                                  | 1288.81                | 644.91               | 430.28               |

Table S5: List of targeted peptides and associated monoisotopic mass-to-charge ratios that were used as a targeted mass list for choosing parent ions for fragmentation. Mass-to-charge ratios in gray are outside the analyzed range (300-2000). Targeted peptides are grouped by modification site. C# indicates HNE Michael addition at Cys followed by reduction; H@ indicates HNE Michael addition at His followed by reduction; K<sup>+</sup> indicates HNE Michael addition at Lys followed by reduction; K~ indicates Schiff base formation with HNE at Lys followed by reduction; M\* indicates oxidation at Met. Eighteen sites were targeted and both Schiff base formation and Michael addition were considered at two of these sites (Lys-414 and Lys-525). The peptide, FQNALLVR, was included in error and is listed here for completeness. In total, the mass list contained 138 entries.

RELATIVE ABUNDANCE MEASUREMENTS: Changes in relative abundance for HNE-modified and corresponding unmodified HSA peptides were measured using the iTRAQ approach. The targeted mass list was used in all cases. Table S6 gives relative abundances for a comparison of no added HNE with applied HNE:HSA ratios of 50:1 and 100:1. A single repeat experiment was performed and three replicate LC–MS/MS runs were collected using PQD fragmentation on the LTQ XL system. Only mass list peptides are reported in the table. Bolded peptides were used in constructing Figure 1 in the main document. Tables S7 and S8 give the results of an experiment in which incubation time was varied at the 100:1 HNE:HSA ratio. Incubation times of 0, 1, 3, and 24 h were investigated. Three complete repeats were performed. For each repeat, three replicate LC–MS/MS runs were collected using PQD fragmentation on the LTQ XL system and three further replicates were recorded using HCD fragmentation on the LTQ Orbitrap Velos system. Linear ion trap/PQD results are given as Table S7 and Orbitrap/HCD results are given as Table S8. Together, these results were used to construct Figures 2 and 3 in the main document (Figure 2 displays results for the histidines while Figure 3 does the same for the lysines). Bolded entries in the tables indicate those peptides used in constructing the main document figures. Where more than one peptide was available to represent a site (most common for the unmodified peptides corresponding to the lysine modification sites), the most frequently-detected peptide was used. As can be seen from Tables S6–S8, the same peptides were chosen for use in constructing the main document figures in all cases. For peptide identification acceptance, a PeptideProphet score of 0.9 or greater was required and MS/MS for which all four iTRAQ reporter ion intensities were zero were discarded.

| Modification                             | Peptide                            | Detection Count | No HNE Added | 50:1 HNE:HSA | 100:1 HNE:HSA |
|------------------------------------------|------------------------------------|-----------------|--------------|--------------|---------------|
| <i>Cys-034-associated</i>                | <i>ALVLIIFAQYLQQCPFEDHVK</i>       | 412             | 78.9%        | 11.0%        | 10.2%         |
| <i>Cys-034 (MA)</i>                      | <i>ALVLIIFAQYLQQC#PFEDHVK</i>      | 2               | 15.0%        | 0.0%         | 85.0%         |
| <b>His-067-associated</b>                | <b>SLHTLFGDK</b>                   | <b>795</b>      | <b>70.8%</b> | <b>18.6%</b> | <b>10.7%</b>  |
| <b>His-105-associated</b>                | <b>NECFLQHK</b>                    | <b>345</b>      | <b>50.1%</b> | <b>27.8%</b> | <b>22.0%</b>  |
| <i>His-242- &amp; His-247-associated</i> | <i>VHTECCHGDLLECADDR</i>           | 239             | 65.3%        | 19.0%        | 15.7%         |
| <i>His-288-associated</i>                | <i>SHCIAEVENDEMPADLPSLAADFVESK</i> | 433             | 84.0%        | 10.9%        | 5.0%          |
| <b>His-367-associated</b>                | <b>CCAAADPHECYAK</b>               | <b>642</b>      | <b>54.4%</b> | <b>28.4%</b> | <b>17.1%</b>  |
| <b>His-510-associated</b>                | <b>EFNAETTFHADICTLSEK</b>          | <b>748</b>      | <b>75.5%</b> | <b>17.6%</b> | <b>6.9%</b>   |
| <b>His-067 (MA)</b>                      | <b>SLH@TLFGDK</b>                  | <b>916</b>      | <b>1.3%</b>  | <b>51.2%</b> | <b>47.5%</b>  |
| <b>His-105 (MA)</b>                      | <b>NECFLQH@K</b>                   | <b>89</b>       | <b>1.2%</b>  | <b>42.7%</b> | <b>56.1%</b>  |
| <b>His-367 (MA)</b>                      | <b>CCAAADPH@ECYAK</b>              | <b>326</b>      | <b>2.1%</b>  | <b>42.6%</b> | <b>55.2%</b>  |
| <b>His-510 (MA)</b>                      | <b>EFNAETTFH@ADICTLSEK</b>         | <b>126</b>      | <b>2.7%</b>  | <b>34.4%</b> | <b>62.8%</b>  |
| <i>Lys-051-associated</i>                | <i>LVNEVTEFAK</i>                  | 1356            | 46.6%        | 31.2%        | 22.3%         |
| <b>Lys-162-associated</b>                | <b>AAFTECCQAADK</b>                | <b>527</b>      | <b>49.7%</b> | <b>30.4%</b> | <b>19.9%</b>  |
| <b>Lys-199-associated</b>                | <b>CASLQK</b>                      | <b>21</b>       | <b>82.2%</b> | <b>14.2%</b> | <b>3.6%</b>   |
| <b>Lys-233-associated</b>                | <b>AEFAEVSK</b>                    | <b>1018</b>     | <b>44.2%</b> | <b>29.7%</b> | <b>26.2%</b>  |
| <i>Lys-233-associated</i>                | <i>LVTDLTK</i>                     | 313             | 42.4%        | 30.6%        | 27.1%         |
| <i>Lys-262-associated</i>                | <i>ADLAK</i>                       | 6               | 47.2%        | 25.5%        | 27.4%         |
| <b>Lys-262-associated</b>                | <b>YICENQDSISSK</b>                | <b>1195</b>     | <b>47.6%</b> | <b>29.6%</b> | <b>22.8%</b>  |
| <b>Lys-351-associated</b>                | <b>TYETTLEK</b>                    | <b>212</b>      | <b>59.2%</b> | <b>26.7%</b> | <b>14.1%</b>  |
| <b>Lys-378-associated</b>                | <b>VFDEFKPLVEEPQNLIK</b>           | <b>895</b>      | <b>46.5%</b> | <b>29.4%</b> | <b>24.1%</b>  |
| <b>Lys-414-associated</b>                | <b>KVPQVSTPTLVEVSR</b>             | <b>778</b>      | <b>46.5%</b> | <b>32.0%</b> | <b>21.5%</b>  |
| <i>Lys-414-associated</i>                | <i>VPQVSTPTLVEVSR</i>              | 575             | 37.4%        | 36.5%        | 26.1%         |
| <i>Lys-525-associated</i>                | <i>KQTALVELVK</i>                  | 174             | 79.4%        | 15.9%        | 4.7%          |
| <b>Lys-525-associated</b>                | <b>QTALVELVK</b>                   | <b>794</b>      | <b>70.1%</b> | <b>18.4%</b> | <b>11.5%</b>  |
| <b>Lys-162 (MA)</b>                      | <b>YK^AAFTECCQAADK</b>             | <b>44</b>       | <b>1.6%</b>  | <b>44.0%</b> | <b>54.4%</b>  |
| <b>Lys-199 (MA)</b>                      | <b>LK^CASLQK</b>                   | <b>1</b>        | <b>0.0%</b>  | <b>41.2%</b> | <b>58.8%</b>  |
| <b>Lys-233 (MA)</b>                      | <b>AEFAEVSK^LVTDLTK</b>            | <b>79</b>       | <b>1.7%</b>  | <b>28.6%</b> | <b>69.6%</b>  |
| <b>Lys-262 (MA)</b>                      | <b>ADLAK^YICENQDSISSK</b>          | <b>2</b>        | <b>0.0%</b>  | <b>13.0%</b> | <b>87.0%</b>  |
| <b>Lys-351 (MA)</b>                      | <b>LAK^TYETTLEK</b>                | <b>43</b>       | <b>1.2%</b>  | <b>44.8%</b> | <b>54.1%</b>  |
| <b>Lys-378 (MA)</b>                      | <b>VFDEFK^PLVEEPQNLIK</b>          | <b>43</b>       | <b>21.3%</b> | <b>27.6%</b> | <b>51.0%</b>  |
| <b>Lys-414 (MA)</b>                      | <b>K^VPQVSTPTLVEVSR</b>            | <b>248</b>      | <b>10.5%</b> | <b>45.9%</b> | <b>43.6%</b>  |
| <b>Lys-414 (SB)</b>                      | <b>K~VPQVSTPTLVEVSR</b>            | <b>118</b>      | <b>12.5%</b> | <b>43.9%</b> | <b>43.7%</b>  |
| <b>Lys-525 (MA)</b>                      | <b>K^QTALVELVK</b>                 | <b>135</b>      | <b>1.0%</b>  | <b>54.1%</b> | <b>44.9%</b>  |
| <b>Lys-525 (SB)</b>                      | <b>K~QTALVELVK</b>                 | <b>12</b>       | <b>2.2%</b>  | <b>70.3%</b> | <b>27.5%</b>  |

Table S6: Change in relative abundance for HNE-modified and corresponding unmodified HSA peptides in response to HNE-exposure at stated HNE:HSA molar ratios. Raw iTRAQ reporter ion intensities for each MS/MS are converted to relative percentages and then averaged for each peptide; since the control was duplicated, raw intensity for the two control signals was averaged before relative percentages were calculated. iTRAQ reporter ion intensities were obtained using pulsed-Q dissociation (PQD) in a linear ion trap mass spectrometer. This dataset is the result of a single repeat preparation subjected to three replicate LC-MS/MS runs. Incubation time with HNE was 3 h. The mass list described in Table S5 was used and only mass list peptides are included in this table. Bolded entries were used in constructing Figure 1 while italicized entries were not used. For a peptide identification to be accepted, a PeptideProphet score of 0.9 or greater was required. MS/MS where all four iTRAQ reporter ion intensities were zero were discarded. C# indicates HNE Michael addition at Cys followed by reduction; H@ indicates HNE Michael addition at His followed by reduction; K^ indicates HNE Michael addition at Lys followed by reduction; K~ indicates Schiff base formation with HNE at Lys followed by reduction; M\* indicates oxidation at Met.

| Modification                             | Peptide                              | Detection Count | Repeat Count | 100:1 HNE:HSA for 0 h | 100:1 HNE:HSA for 1 h | 100:1 HNE:HSA for 3 h | 100:1 HNE:HSA for 24 h |
|------------------------------------------|--------------------------------------|-----------------|--------------|-----------------------|-----------------------|-----------------------|------------------------|
| <i>Cys-034-associated</i>                | <i>ALVLIIFAQYLQQCPFEDHVK</i>         | 342             | 3            | 31.6%                 | 20.2%                 | 19.1%                 | 29.1%                  |
| <i>Cys-034 (MA)</i>                      | <i>ALVLIIFAQYLQQCPFEDHVK</i>         | 70              | 1            | 3.2%                  | 32.4%                 | 24.2%                 | 40.3%                  |
| <b>His-067-associated</b>                | <b>SLHTLFGDK</b>                     | 953             | 3            | 52.4%                 | 28.4%                 | 13.6%                 | 5.5%                   |
| <b>His-105-associated</b>                | <b>NECFLQHK</b>                      | 437             | 3            | 33.2%                 | 28.1%                 | 24.5%                 | 14.1%                  |
| <b>His-242- &amp; His-247-associated</b> | <b>VHTECCHGDLLECADDR</b>             | 353             | 3            | 51.4%                 | 15.6%                 | 21.0%                 | 12.0%                  |
| <i>His-288-associated</i>                | <i>SHCIAEVENDEM*PADLPSLAADFVESK</i>  | 857             | 2            | 14.4%                 | 57.8%                 | 15.1%                 | 12.7%                  |
| <b>His-288-associated</b>                | <b>SHCIAEVENDEMPADLPSLAADFVESK</b>   | 866             | 3            | 60.2%                 | 17.7%                 | 13.3%                 | 8.8%                   |
| <b>His-367-associated</b>                | <b>CCAAADPHECYAK</b>                 | 966             | 3            | 35.5%                 | 30.2%                 | 22.1%                 | 12.2%                  |
| <b>His-510-associated</b>                | <b>EFNAETFTFHADICTLSEK</b>           | 2204            | 3            | 48.0%                 | 27.8%                 | 13.9%                 | 10.4%                  |
| <b>His-067 (MA)</b>                      | <b>SLH@TLFGDK</b>                    | 3622            | 3            | 0.9%                  | 28.2%                 | 37.6%                 | 33.3%                  |
| <b>His-105 (MA)</b>                      | <b>NECFLQH@K</b>                     | 260             | 3            | 0.9%                  | 24.9%                 | 27.5%                 | 46.7%                  |
| <b>His-242 (MA)</b>                      | <b>VH@TECCHGDLLECADDR</b>            | 8               | 3            | 0.4%                  | 26.4%                 | 43.5%                 | 29.7%                  |
| <i>His-288 (MA)</i>                      | <i>SH@CIAEVENDEM*PADLPSLAADFVESK</i> | 834             | 2            | 1.2%                  | 13.8%                 | 45.7%                 | 39.4%                  |
| <b>His-288 (MA)</b>                      | <b>SH@CIAEVENDEMPADLPSLAADFVESK</b>  | 2751            | 2            | 2.2%                  | 13.6%                 | 45.1%                 | 39.1%                  |
| <b>His-367 (MA)</b>                      | <b>CCAAADPH@ECYAK</b>                | 1401            | 3            | 1.2%                  | 14.8%                 | 23.8%                 | 60.2%                  |
| <b>His-510 (MA)</b>                      | <b>EFNAETFTFH@ADICTLSEK</b>          | 1722            | 3            | 1.2%                  | 23.8%                 | 36.9%                 | 38.2%                  |
| <i>Lys-051-associated</i>                | <i>LVNEVTEFAK</i>                    | 2442            | 3            | 26.4%                 | 27.4%                 | 23.9%                 | 22.3%                  |
| <b>Lys-162-associated</b>                | <b>AAFTECCQAADK</b>                  | 1052            | 3            | 32.2%                 | 29.4%                 | 23.3%                 | 15.1%                  |
| <b>Lys-199-associated</b>                | <b>CASLQK</b>                        | 29              | 2            | 79.8%                 | 6.0%                  | 6.6%                  | 7.6%                   |
| <b>Lys-233-associated</b>                | <b>AEFAEVSK</b>                      | 1404            | 3            | 26.5%                 | 27.7%                 | 24.1%                 | 21.6%                  |
| <i>Lys-233-associated</i>                | <i>AEFAEVSKLVDTLTK</i>               | 1               | 1            | 6.3%                  | 39.7%                 | 24.5%                 | 29.5%                  |
| <i>Lys-233-associated</i>                | <i>LVDTLTK</i>                       | 499             | 3            | 27.1%                 | 26.7%                 | 25.2%                 | 21.1%                  |
| <i>Lys-262-associated</i>                | <i>ADLAK</i>                         | 5               | 2            | 35.0%                 | 17.7%                 | 19.6%                 | 27.7%                  |
| <b>Lys-262-associated</b>                | <b>YICENQDSISSK</b>                  | 1803            | 3            | 26.2%                 | 26.4%                 | 23.8%                 | 23.6%                  |
| <b>Lys-351-associated</b>                | <b>TYETLEK</b>                       | 344             | 3            | 39.4%                 | 26.8%                 | 19.1%                 | 14.7%                  |
| <b>Lys-378-associated</b>                | <b>VFDEFKPLVEEPQNLIK</b>             | 6292            | 3            | 24.2%                 | 28.2%                 | 25.0%                 | 22.6%                  |
| <b>Lys-414-associated</b>                | <b>KVPQVSTPTLVEVSR</b>               | 1293            | 3            | 32.1%                 | 27.0%                 | 22.9%                 | 18.0%                  |
| <i>Lys-414-associated</i>                | <i>VPQVSTPTLVEVSR</i>                | 1052            | 3            | 19.8%                 | 36.5%                 | 24.8%                 | 18.9%                  |
| <i>Lys-525-associated</i>                | <i>QTALVELVK</i>                     | 270             | 3            | 62.9%                 | 13.9%                 | 12.5%                 | 10.7%                  |
| <b>Lys-525-associated</b>                | <b>QTALVELVK</b>                     | 1020            | 3            | 48.5%                 | 17.5%                 | 16.6%                 | 17.3%                  |
| <b>Lys-162 (MA)</b>                      | <b>YK^AAFTECCQAADK</b>               | 210             | 3            | 1.3%                  | 32.1%                 | 38.5%                 | 28.1%                  |
| <b>Lys-199 (MA)</b>                      | <b>LK^CASLQK</b>                     | 33              | 3            | 1.1%                  | 26.7%                 | 38.3%                 | 33.9%                  |
| <b>Lys-212 (MA)</b>                      | <b>AFK^AWAVAR</b>                    | 48              | 2            | 9.2%                  | 14.4%                 | 21.2%                 | 55.2%                  |
| <b>Lys-233 (MA)</b>                      | <b>AEFAEVSK^LVDTLTK</b>              | 355             | 3            | 0.9%                  | 11.2%                 | 21.2%                 | 66.7%                  |
| <b>Lys-262 (MA)</b>                      | <b>ADLAK^YICENQDSISSK</b>            | 120             | 3            | 0.9%                  | 18.0%                 | 26.8%                 | 54.4%                  |
| <b>Lys-351 (MA)</b>                      | <b>LAK^TYETLEK</b>                   | 222             | 3            | 2.2%                  | 20.7%                 | 38.4%                 | 38.7%                  |
| <b>Lys-378 (MA)</b>                      | <b>VFDEFK^PLVEEPQNLIK</b>            | 357             | 3            | 11.6%                 | 22.0%                 | 24.8%                 | 41.6%                  |
| <b>Lys-414 (MA)</b>                      | <b>K^VPQVSTPTLVEVSR</b>              | 501             | 3            | 6.4%                  | 33.4%                 | 26.5%                 | 33.7%                  |
| <b>Lys-414 (SB)</b>                      | <b>K~VPQVSTPTLVEVSR</b>              | 145             | 3            | 11.7%                 | 44.6%                 | 28.2%                 | 15.5%                  |
| <b>Lys-525 (MA)</b>                      | <b>K^QTALVELVK</b>                   | 345             | 3            | 1.1%                  | 20.2%                 | 30.8%                 | 47.8%                  |
| <b>Lys-525 (SB)</b>                      | <b>K~QTALVELVK</b>                   | 1               | 1            | 0.0%                  | 0.0%                  | 20.2%                 | 79.8%                  |

Table S7: Change in relative abundance for HNE-modified and corresponding unmodified HSA peptides in response to HNE-exposure time at a 100:1 HNE:HSA molar ratio. Raw iTRAQ reporter ion intensities for each MS/MS are converted to relative percentages and then averaged for each peptide. iTRAQ reporter ion intensities were obtained using pulsed-Q dissociation (PQD) in a linear ion trap mass spectrometer. This dataset is the result of a three repeat preparations subjected to three replicate LC-MS/MS runs each. The Repeat Count column gives a count of repeats in which the peptide in question was identified. The same set of three repeat preparations was analyzed using the LTQ Orbitrap Velos system (see Table S8). The mass list described in Table S5 was used and only mass list peptides are included in this table. Bolded entries were used in constructing Figures 2 and 3 while italicized entries were not used. For a peptide identification to be accepted, a PeptideProphet score of 0.9 or greater was required. MS/MS where all four iTRAQ reporter ion intensities were zero were discarded. C# indicates HNE Michael addition at Cys followed by reduction; H@ indicates HNE Michael addition at His followed by reduction; K^ indicates HNE Michael addition at Lys followed by reduction; K~ indicates Schiff base formation with HNE at Lys followed by reduction; M\* indicates oxidation at Met.

| Modification                             | Peptide                       | Detection Count | Repeat Count | 100:1 HNE:HSA for 0 h | 100:1 HNE:HSA for 1 h | 100:1 HNE:HSA for 3 h | 100:1 HNE:HSA for 24 h |
|------------------------------------------|-------------------------------|-----------------|--------------|-----------------------|-----------------------|-----------------------|------------------------|
| <i>Cys-034-associated</i>                | ALVLIIFAQYLQQCFEDHVK          | 587             | 3            | 36.2%                 | 19.3%                 | 20.0%                 | 24.6%                  |
| <i>Cys-034 (MA)</i>                      | ALVLIIFAQYLQQC#PFEDHVK        | 42              | 3            | 0.1%                  | 28.0%                 | 29.4%                 | 42.5%                  |
| <b>His-067-associated</b>                | SLHTLFGDK                     | 415             | 3            | 52.7%                 | 26.6%                 | 14.4%                 | 6.2%                   |
| <b>His-105-associated</b>                | NECFLQHK                      | 136             | 3            | 32.6%                 | 26.6%                 | 24.7%                 | 16.1%                  |
| <b>His-242- &amp; His-247-associated</b> | VHTECCHGDLLECAADDR            | 165             | 3            | 67.1%                 | 6.5%                  | 15.4%                 | 11.0%                  |
| <i>His-288-associated</i>                | SHCIAEVENDEM*PADLPSLAADFVESK  | 427             | 3            | 58.2%                 | 23.1%                 | 8.1%                  | 10.5%                  |
| <b>His-288-associated</b>                | SHCIAEVENDEMPADLPSLAADFVESK   | 447             | 3            | 63.8%                 | 8.5%                  | 9.2%                  | 18.5%                  |
| <b>His-367-associated</b>                | CCAAADPHECYAK                 | 242             | 3            | 35.5%                 | 29.2%                 | 22.9%                 | 12.4%                  |
| <b>His-510-associated</b>                | EFNAETFTFHADICTLSEK           | 3968            | 3            | 53.1%                 | 25.3%                 | 12.5%                 | 9.2%                   |
| <b>His-067 (MA)</b>                      | SLH@TLFGDK                    | 1726            | 3            | 0.7%                  | 27.6%                 | 37.6%                 | 34.0%                  |
| <b>His-105 (MA)</b>                      | NECFLQH@K                     | 144             | 3            | 0.3%                  | 17.3%                 | 24.1%                 | 58.4%                  |
| <b>His-242 (MA)</b>                      | VH@TECCHGDLLECAADDR           | 1               | 1            | 0.0%                  | 5.8%                  | 26.3%                 | 67.9%                  |
| <i>His-288 (MA)</i>                      | SH@CIAEVENDEM*PADLPSLAADFVESK | 432             | 3            | 0.7%                  | 18.2%                 | 44.0%                 | 37.2%                  |
| <b>His-288 (MA)</b>                      | SH@CIAEVENDEMPADLPSLAADFVESK  | 517             | 3            | 0.9%                  | 17.0%                 | 45.8%                 | 36.3%                  |
| <b>His-367 (MA)</b>                      | CCAAADPH@ECYAK                | 300             | 3            | 1.6%                  | 14.6%                 | 23.8%                 | 60.0%                  |
| <b>His-510 (MA)</b>                      | EFNAETFTFH@ADICTLSEK          | 1709            | 3            | 0.3%                  | 24.6%                 | 37.3%                 | 37.8%                  |
| <i>Lys-051-associated</i>                | LVNEVTEFAK                    | 1711            | 3            | 26.3%                 | 25.8%                 | 24.0%                 | 23.9%                  |
| <b>Lys-162-associated</b>                | AAFTCCQAADK                   | 326             | 3            | 32.9%                 | 27.2%                 | 23.4%                 | 16.5%                  |
| <b>Lys-199-associated</b>                | CASLQK                        | 3               | 1            | 84.3%                 | 0.9%                  | 5.8%                  | 9.0%                   |
| <b>Lys-212-associated</b>                | AWAVAR                        | 18              | 2            | 25.8%                 | 26.4%                 | 27.0%                 | 20.8%                  |
| <b>Lys-233-associated</b>                | AEFAEVSK                      | 1405            | 3            | 25.5%                 | 25.9%                 | 25.2%                 | 23.4%                  |
| <i>Lys-233-associated</i>                | LVTDLTK                       | 83              | 2            | 21.4%                 | 25.2%                 | 28.1%                 | 25.3%                  |
| <i>Lys-262-associated</i>                | ADLAK                         | 33              | 2            | 21.1%                 | 24.3%                 | 26.7%                 | 27.9%                  |
| <b>Lys-262-associated</b>                | YICENQDSISSK                  | 433             | 3            | 25.7%                 | 26.5%                 | 24.3%                 | 23.6%                  |
| <i>Lys-351-associated</i>                | LAKTYETTLEK                   | 3               | 1            | 40.2%                 | 23.5%                 | 23.3%                 | 13.0%                  |
| <b>Lys-351-associated</b>                | TYETTLEK                      | 318             | 3            | 38.4%                 | 25.2%                 | 20.3%                 | 16.1%                  |
| <b>Lys-378-associated</b>                | VFDEFKPLVEEPQNLIK             | 3490            | 3            | 25.0%                 | 26.8%                 | 24.8%                 | 23.4%                  |
| <b>Lys-414-associated</b>                | KVPQVSTPTLVEVSR               | 2689            | 3            | 34.2%                 | 23.8%                 | 21.9%                 | 20.0%                  |
| <i>Lys-414-associated</i>                | VPQVSTPTLVEVSR                | 335             | 3            | 24.3%                 | 20.2%                 | 24.5%                 | 30.9%                  |
| <i>Lys-525-associated</i>                | QTALVELVK                     | 105             | 3            | 64.5%                 | 11.2%                 | 13.0%                 | 11.3%                  |
| <b>Lys-525-associated</b>                | QTALVELVK                     | 337             | 3            | 49.7%                 | 14.0%                 | 17.4%                 | 18.9%                  |
| <b>Lys-162 (MA)</b>                      | YK^AAFTCCQAADK                | 109             | 3            | 1.2%                  | 30.3%                 | 38.9%                 | 29.5%                  |
| <b>Lys-199 (MA)</b>                      | LK^CASLQK                     | 82              | 3            | 1.3%                  | 27.5%                 | 37.7%                 | 33.5%                  |
| <b>Lys-212 (MA)</b>                      | AFK^AWAVAR                    | 183             | 3            | 1.3%                  | 10.7%                 | 21.2%                 | 66.8%                  |
| <b>Lys-233 (MA)</b>                      | AEFAEVSK^LVTDLTK              | 259             | 3            | 0.0%                  | 7.5%                  | 18.8%                 | 73.6%                  |
| <b>Lys-262 (MA)</b>                      | ADLAK^YICENQDSISSK            | 221             | 3            | 0.8%                  | 14.1%                 | 24.8%                 | 60.2%                  |
| <b>Lys-351 (MA)</b>                      | LAK^TYETTLEK                  | 358             | 3            | 1.3%                  | 23.9%                 | 34.4%                 | 40.3%                  |
| <b>Lys-378 (MA)</b>                      | VFDEFK^PLVEEPQNLIK            | 222             | 3            | 11.0%                 | 18.4%                 | 23.1%                 | 47.5%                  |
| <b>Lys-414 (MA)</b>                      | K^VPQVSTPTLVEVSR              | 168             | 3            | 8.5%                  | 30.2%                 | 26.9%                 | 34.4%                  |
| <b>Lys-414 (SB)</b>                      | K-VPQVSTPTLVEVSR              | 139             | 3            | 13.0%                 | 40.3%                 | 29.7%                 | 17.0%                  |
| <b>Lys-525 (MA)</b>                      | K^QTALVELVK                   | 269             | 3            | 0.6%                  | 23.9%                 | 33.3%                 | 42.3%                  |
| <b>Lys-525 (SB)</b>                      | K-QTALVELVK                   | 150             | 3            | 0.7%                  | 54.6%                 | 33.8%                 | 10.8%                  |

Table S8: Change in relative abundance for HNE-modified and corresponding unmodified HSA peptides in response to HNE-exposure time at a 100:1 HNE:HSA molar ratio. Raw iTRAQ reporter ion intensities for each MS/MS are converted to relative percentages and then averaged for each peptide. iTRAQ reporter ion intensities were obtained using higher-energy C-trap dissociation (HCD) in an Orbitrap mass spectrometer. This dataset is the result of a three repeat preparations subjected to three replicate LC-MS/MS runs each. The Repeat Count column gives a count of repeats in which the peptide in question was identified. The same set of three repeat preparations was analyzed using the LTQ XL system (see Table S7). The mass list described in Table S5 was used and only mass list peptides are included in this table. Bolded entries were used in constructing Figures 2 and 3 while italicized entries were not used. For a peptide identification to be accepted, a PeptideProphet score of 0.9 or greater was required. MS/MS where all four iTRAQ reporter ion intensities were zero were discarded. C# indicates HNE Michael addition at Cys followed by reduction; H@ indicates HNE Michael addition at His followed by reduction; K@ indicates HNE Michael addition at Lys followed by reduction; K- indicates Schiff base formation with HNE at Lys followed by reduction; M\* indicates oxidation at Met.

## References

- [1] J.K. Eng, J.R. Yates, III, A.L. McCormack, An Approach to Correlate Tandem Mass Spectral Data of Peptides with Amino Acid Sequences in a Protein Database, *J. Am. Soc. Mass Spectrom.* 5 (1994) 976-989.
- [2] A. Keller, A.I. Nesvizhskii, E. Kolker, R. Aebersold, Empirical Statistical Model to Estimate the Accuracy of Peptide Identifications made by MS/MS and Database Search, *Anal. Chem.* 74 (2002) 5383-5392.
- [3] H. Choi, A.I. Nesvizhskii, Semisupervised Model-Based Validation of Peptide Identifications in Mass Spectrometry-Based Proteomics, *J. Proteome Res.* 7 (2008) 254-265.
- [4] G. Aldini, L. Gamberoni, M. Orioli, G. Beretta, L. Regazzoni, R.M. Facino, et al., Mass Spectrometric Characterization of Covalent Modification of Human Serum Albumin by 4-Hydroxy-*trans*-2-nonenal, *J. Mass Spectrom.* 41 (2006) 1149-1161.
- [5] M.E. Szapacs, J.N. Riggins, L.J. Zimmerman, D.C. Liebler, Covalent Adduction of Human Serum Albumin by 4-Hydroxy-2-nonenal: Kinetic Analysis of Competing Alkylation Reactions, *Biochemistry* 45 (2006) 10521-10528.

## Index of Example LTQ XL Linear Ion Trap Tandem Mass Spectra

| Modified Peptide (with flanking residues) | Modification Site or Sites (MA indicates Michael addition; SB indicates Schiff base formation) | Type | Sequest Xcorr | Sequest DeltaCn | Sequest RankSp | Peptide Prophet Score | Page Number |
|-------------------------------------------|------------------------------------------------------------------------------------------------|------|---------------|-----------------|----------------|-----------------------|-------------|
| K.ALVLIAFAQYLQQC#PFEDHVK.L                | Cys-034 (MA)                                                                                   | CID  | 4.873         | 0.477           | 1              | 1.0000                | 17          |
| K.ALVLIAFAQYLQQC#PFEDHVK.L                | Cys-034 (MA)                                                                                   | ETD  | 5.488         | 0.458           | 1              | 1.0000                | 18          |
| K.SLH@TLFGDK.L                            | His-067 (MA)                                                                                   | CID  | 3.949         | 0.302           | 1              | 0.9999                | 19          |
| K.SLH@TLFGDK.L                            | His-067 (MA)                                                                                   | ETD  | 3.687         | 0.287           | 1              | 0.9998                | 20          |
| K.SLHTLFGDK*LCTVATLR.E                    | Lys-073 (MA)                                                                                   | CID  | 2.956         | 0.391           | 1              | 0.9770                | 21          |
| R.NECFLQHK-DDNPNLPR.L                     | Lys-106 (SB)                                                                                   | ETD  | 4.241         | 0.372           | 1              | 0.9982                | 22          |
| R.LVRPEVDVMCTAFH@DNEETFLK.K               | His-128 (MA)                                                                                   | CID  | 5.787         | 0.436           | 1              | 1.0000                | 23          |
| R.LVRPEVDVMCTAFH@DNEETFLK.K               | His-128 (MA)                                                                                   | ETD  | 5.225         | 0.457           | 1              | 1.0000                | 24          |
| K.K*YLYEIAR.R                             | Lys-137 (MA)                                                                                   | CID  | 3.041         | 0.312           | 1              | 0.9919                | 25          |
| R.RH@PYFYAPELLFFAK.R                      | His-146 (MA)                                                                                   | CID  | 4.582         | 0.501           | 1              | 1.0000                | 26          |
| R.RH@PYFYAPELLFFAK.R                      | His-146 (MA)                                                                                   | ETD  | 5.467         | 0.433           | 1              | 1.0000                | 27          |
| R.RH@PYFYAPELLFFAKR.Y                     | His-146 (MA)                                                                                   | CID  | 6.144         | 0.446           | 1              | 1.0000                | 28          |
| R.RH@PYFYAPELLFFAK*R.Y                    | His-146 (MA) & Lys-159 (MA)                                                                    | ETD  | 5.282         | 0.353           | 1              | 0.9999                | 29          |
| R.YK*AAFTECCQAADK.A                       | Lys-162 (MA)                                                                                   | CID  | 5.758         | 0.560           | 1              | 1.0000                | 30          |
| R.YK*AAFTECCQAADK.A                       | Lys-162 (MA)                                                                                   | ETD  | 5.303         | 0.489           | 1              | 1.0000                | 31          |
| R.YK-AAFTECCQAADK.A                       | Lys-162 (SB)                                                                                   | CID  | 4.249         | 0.331           | 1              | 0.9970                | 32          |
| R.YK-AAFTECCQAADK.A                       | Lys-162 (SB)                                                                                   | ETD  | 4.803         | 0.354           | 1              | 0.9980                | 33          |
| R.LK*CASLQK.F                             | Lys-199 (MA)                                                                                   | CID  | 4.196         | 0.261           | 1              | 0.9961                | 34          |
| R.AFK*AWAVAR.L                            | Lys-212 (MA)                                                                                   | CID  | 3.815         | 0.257           | 2              | 0.9782                | 35          |
| K.AEFAEVSK*LVTDLTK.V                      | Lys-233 (MA)                                                                                   | CID  | 3.979         | 0.313           | 1              | 0.9931                | 36          |
| K.AEFAEVSK*LVTDLTK.V                      | Lys-233 (MA)                                                                                   | ETD  | 3.436         | 0.371           | 1              | 1.0000                | 37          |
| K.LVTDLTK*VH@TECCHGDLLECADDR.A            | Lys-240 (MA) & His-242 (MA)                                                                    | CID  | 4.775         | 0.319           | 1              | 0.9843                | 38          |
| K.VH@TECCHGDLLECADDR.A                    | His-242 (MA)                                                                                   | ETD  | 4.505         | 0.274           | 1              | 0.9997                | 39          |
| K.VH@TECCH@GDLLECADDR.A                   | His-242 (MA) & His-247 (MA)                                                                    | CID  | 4.561         | 0.419           | 1              | 1.0000                | 40          |
| K.VH@TECCH@GDLLECADDR.A                   | His-242 (MA) & His-247 (MA)                                                                    | ETD  | 3.321         | 0.329           | 1              | 0.9995                | 41          |
| K.VH@TECCH@GDLLECADDRADLAK.Y              | His-242 (MA) & His-247 (MA)                                                                    | CID  | 4.297         | 0.361           | 1              | 0.9923                | 42          |
| K.VH@TECCH@GDLLECADDRADLAK.Y              | His-242 (MA) & His-247 (MA)                                                                    | ETD  | 5.437         | 0.432           | 1              | 0.9996                | 43          |
| R.ADLAK*YICENQDSISSK.L                    | Lys-262 (MA)                                                                                   | CID  | 4.947         | 0.447           | 1              | 0.9999                | 44          |
| R.ADLAK*YICENQDSISSK.L                    | Lys-262 (MA)                                                                                   | ETD  | 4.260         | 0.427           | 1              | 0.9978                | 45          |
| K.SH@CIAEVENDEMPADLPSLAADFVESK.D          | His-288 (MA)                                                                                   | CID  | 6.548         | 0.471           | 1              | 1.0000                | 46          |
| K.SH@CIAEVENDEMPADLPSLAADFVESK.D          | His-288 (MA)                                                                                   | ETD  | 5.269         | 0.555           | 1              | 1.0000                | 47          |
| K.SH@CIAEVENDEM*PADLPSLAADFVESK.D         | His-288 (MA)                                                                                   | CID  | 7.038         | 0.576           | 1              | 1.0000                | 48          |
| K.SH@CIAEVENDEM*PADLPSLAADFVESK.D         | His-288 (MA)                                                                                   | ETD  | 3.552         | 0.224           | 1              | 0.9868                | 49          |
| R.RH@PDYSVLLLLR.L                         | His-338 (MA)                                                                                   | CID  | 4.528         | 0.420           | 1              | 1.0000                | 50          |
| R.RH@PDYSVLLLLR.L                         | His-338 (MA)                                                                                   | ETD  | 4.562         | 0.432           | 1              | 1.0000                | 51          |
| R.H@PDYSVLLLLR.L                          | His-338 (MA)                                                                                   | CID  | 4.439         | 0.250           | 1              | 0.9997                | 52          |
| R.H@PDYSVLLLLRLAKTYETLLEK.C               | His-338 (MA)                                                                                   | CID  | 3.784         | 0.360           | 1              | 0.9821                | 53          |
| R.H@PDYSVLLLLRLAKTYETLLEK.C               | His-338 (MA)                                                                                   | ETD  | 6.466         | 0.463           | 1              | 0.9962                | 54          |
| R.LAK*TYETLLEK.C                          | Lys-351 (MA)                                                                                   | CID  | 4.137         | 0.420           | 1              | 0.9998                | 55          |
| R.LAK-TYETLLEK.C                          | Lys-351 (SB)                                                                                   | CID  | 3.265         | 0.311           | 2              | 0.9704                | 56          |
| R.LAK-TYETLLEK.C                          | Lys-351 (SB)                                                                                   | ETD  | 3.874         | 0.412           | 1              | 0.9988                | 57          |
| K.TYETLLEK*CCAAADPHECYAK.V                | Lys-359 (MA)                                                                                   | CID  | 5.601         | 0.527           | 1              | 1.0000                | 58          |
| K.TYETLLEK*CCAAADPHECYAK.V                | Lys-359 (MA)                                                                                   | ETD  | 4.199         | 0.381           | 1              | 0.9957                | 59          |
| K.CCAAADPH@ECYAK.V                        | His-367 (MA)                                                                                   | CID  | 4.350         | 0.460           | 1              | 0.9987                | 60          |
| K.VFDEFK*PLVEEPQNLK.Q                     | Lys-378 (MA)                                                                                   | CID  | 4.943         | 0.479           | 1              | 1.0000                | 61          |
| K.VFDEFK*PLVEEPQNLK.Q                     | Lys-378 (MA)                                                                                   | ETD  | 2.804         | 0.178           | 2              | 0.9295                | 62          |
| K.QNCELFEQLGEYK*FQNALLVR.Y                | Lys-402 (MA)                                                                                   | CID  | 3.700         | 0.442           | 1              | 0.9991                | 63          |
| K.K*VPQVSTPTLVEVSR.N                      | Lys-414 (MA)                                                                                   | CID  | 4.007         | 0.435           | 1              | 1.0000                | 64          |
| K.K*VPQVSTPTLVEVSR.N                      | Lys-414 (MA)                                                                                   | ETD  | 4.331         | 0.346           | 1              | 0.9999                | 65          |
| K.K-VPQVSTPTLVEVSR.N                      | Lys-414 (SB)                                                                                   | CID  | 4.161         | 0.488           | 1              | 1.0000                | 66          |
| K.K-VPQVSTPTLVEVSR.N                      | Lys-414 (SB)                                                                                   | ETD  | 4.454         | 0.297           | 1              | 0.9998                | 67          |
| R.VTK*CCTESLVNR.R                         | Lys-475 (MA)                                                                                   | CID  | 3.635         | 0.402           | 1              | 0.9991                | 68          |
| K.EFNAETFTFH@ADICTLSEK.E                  | His-510 (MA)                                                                                   | CID  | 5.059         | 0.588           | 1              | 1.0000                | 69          |
| K.EFNAETFTFH@ADICTLSEK.E                  | His-510 (MA)                                                                                   | ETD  | 3.799         | 0.404           | 1              | 0.9997                | 70          |
| K.EFNAETFTFHADICTLSEK*ER.Q                | Lys-519 (MA)                                                                                   | CID  | 4.686         | 0.393           | 1              | 0.9992                | 71          |
| K.K*QTALVELVK.H                           | Lys-525 (MA)                                                                                   | ETD  | 2.547         | 0.293           | 5              | 0.9961                | 72          |
| K.K-QTALVELVK.H                           | Lys-525 (SB)                                                                                   | CID  | 4.406         | 0.189           | 1              | 0.9991                | 73          |
| K.K-QTALVELVK.H                           | Lys-525 (SB)                                                                                   | ETD  | 4.142         | 0.197           | 2              | 0.9988                | 74          |
| K.EQLK*AVMDDFAAFVEK.C                     | Lys-545 (MA)                                                                                   | CID  | 5.270         | 0.512           | 1              | 1.0000                | 75          |
| K.EQLK*AVMDDFAAFVEK.C                     | Lys-545 (MA)                                                                                   | ETD  | 6.854         | 0.527           | 1              | 1.0000                | 76          |
| K.EQLK-AVMDDFAAFVEK.C                     | Lys-545 (SB)                                                                                   | CID  | 3.975         | 0.414           | 1              | 0.9993                | 77          |
| K.EQLK-AVMDDFAAFVEK.C                     | Lys-545 (SB)                                                                                   | ETD  | 5.433         | 0.552           | 1              | 1.0000                | 78          |

Iodoacetamide addition to cysteine is highlighted in the following Trans-Proteomic Pipeline screenshots, but not in this table (all cysteines were assumed to have been alkylated with iodoacetamide unless HNE addition occurred). C# indicates HNE Michael addition at Cys followed by reduction; H@ indicates HNE Michael addition at His followed by reduction; K^ indicates HNE Michael addition at Lys followed by reduction; K- indicates Schiff base formation with HNE at Lys followed by reduction; M\* indicates oxidation at Met.

## Index of Example LTQ Orbitrap Velos Linear Ion Trap Tandem Mass Spectra

| Modified Peptide (with flanking residues) | Modification Site or Sites (MA indicates Michael addition; SB indicates Schiff base formation) | Type | Sequest Xcorr | Sequest DeltaCn | Sequest RankSp | Peptide Prophet Score | Page Number |
|-------------------------------------------|------------------------------------------------------------------------------------------------|------|---------------|-----------------|----------------|-----------------------|-------------|
| K.DLGEENFKALVLIQFAQYLQQC#PFEDHVK.L        | Cys-034 (MA)                                                                                   | CID  | 4.225         | 0.329           | 1              | 0.9248                | 79          |
| K.ALVLIAFAQYLQQC#PFEDHVK.L                | Cys-034 (MA)                                                                                   | CID  | 5.397         | 0.355           | 1              | 0.9953                | 80          |
| K.SLH@TLFGDK.L                            | His-067 (MA)                                                                                   | CID  | 3.033         | 0.459           | 1              | 0.9988                | 81          |
| R.RH@PYFYAPELFFFAK.R                      | His-146 (MA)                                                                                   | CID  | 6.258         | 0.597           | 1              | 1.0000                | 82          |
| R.RH@PYFYAPELFFFAK^R.Y                    | His-146 (MA) & Lys-159 (MA)                                                                    | CID  | 4.641         | 0.460           | 1              | 0.9989                | 83          |
| R.YK^AAFTECCQAADK.A                       | Lys-162 (MA)                                                                                   | CID  | 4.453         | 0.480           | 1              | 0.9919                | 84          |
| R.LK^CASLQK.F                             | Lys-199 (MA)                                                                                   | CID  | 4.123         | 0.387           | 1              | 0.9845                | 85          |
| R.AFK^AWAVAR.L                            | Lys-212 (MA)                                                                                   | CID  | 3.733         | 0.488           | 1              | 0.9926                | 86          |
| K.SH@CIAEVENDEMPADLPSLAADFVESK.D          | His-288 (MA)                                                                                   | CID  | 6.444         | 0.592           | 1              | 1.0000                | 87          |
| K.SH@CIAEVENDEM^PADLPSLAADFVESK.D         | His-288 (MA)                                                                                   | CID  | 6.357         | 0.610           | 1              | 1.0000                | 88          |
| R.RH@PDYSVVLRL.L                          | His-338 (MA)                                                                                   | CID  | 5.221         | 0.449           | 1              | 0.9997                | 89          |
| K.QNCELFEQLGEYK^FQNALLVR.Y                | Lys-402 (MA)                                                                                   | CID  | 4.428         | 0.489           | 1              | 0.9881                | 90          |
| K.K^VPQVSTPTLVEVSR.N                      | Lys-414 (MA)                                                                                   | CID  | 3.622         | 0.470           | 1              | 0.9990                | 91          |
| K.K-VPQVSTPTLVEVSR.N                      | Lys-414 (SB)                                                                                   | CID  | 4.254         | 0.580           | 1              | 0.9998                | 92          |
| K.K^QTALVELVK.H                           | Lys-525 (MA)                                                                                   | CID  | 3.197         | 0.298           | 1              | 0.9854                | 93          |
| K.K-QTALVELVK.H                           | Lys-525 (SB)                                                                                   | CID  | 5.027         | 0.366           | 1              | 0.9993                | 94          |
| K.EQLK^AVMDDFAAFVEK.C                     | Lys-545 (MA)                                                                                   | CID  | 4.783         | 0.438           | 1              | 0.9868                | 95          |

Iodoacetamide addition to cysteine is highlighted in the following Trans-Proteomic Pipeline screenshots, but not in this table (all cysteines were assumed to have been alkylated with iodoacetamide unless HNE addition occurred). C# indicates HNE Michael addition at Cys followed by reduction; H@ indicates HNE Michael addition at His followed by reduction; K^ indicates HNE Michael addition at Lys followed by reduction; K- indicates Schiff base formation with HNE at Lys followed by reduction; M\* indicates oxidation at Met.



X-range: 200 - 1400  
 MassTol: Y-zoom: 0.950 1.00  
 ImageSize:  Sm  Lg  
 MassType:  AVG  MONO  
 Axis:  1  2  
 Label:  I  M  -  
 Ions: a  +  2+  3+  
 b  +  2+  3+  
 c  +  2+  3+  
 x  +  2+  3+  
 y  +  2+  3+  
 z  +  2+  3+  
 hide H<sub>2</sub>O/NH<sub>3</sub>   
 zoom 112-122   
 zoom 124-133   
 GO

ALVLI<sup>+</sup>FAQYLQCCPFEDHVK, MH+ 2591.5244, m/z 864.5130  
 1HNE-1HSA-37Trypsin3-LTQ2.7420.7420.3.dta

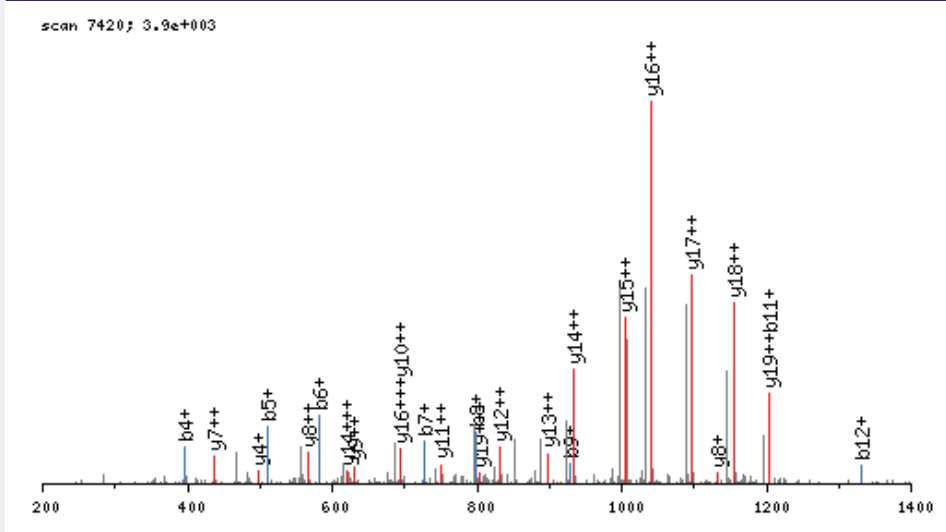

click image to zoom in; click top corners to zoom out [\[precursor±\]](#)

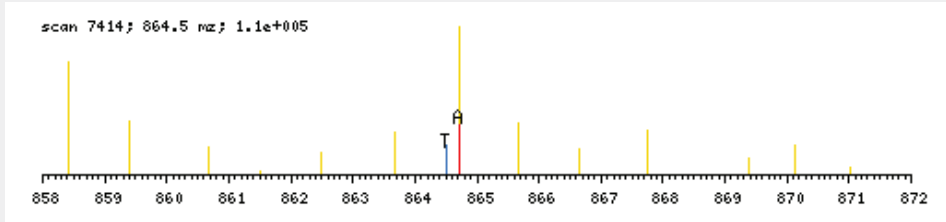

| b <sup>+</sup> | b <sup>2+</sup> | #  | AA | #  | y <sup>+</sup> | y <sup>2+</sup> | y <sup>3+</sup> |
|----------------|-----------------|----|----|----|----------------|-----------------|-----------------|
| 72.0449        | 36.5264         | 1  | A  | 21 |                |                 |                 |
| 185.1290       | 93.0684         | 2  | L  | 20 | 2520.4873      | 1260.7476       | 840.8343        |
| 284.1974       | 142.6026        | 3  | V  | 19 | 2407.4032      | 1204.2055       | 803.1396        |
| 397.2815       | 199.1447        | 4  | L  | 18 | 2308.3348      | 1154.6713       | 770.1168        |
| 510.3655       | 255.6867        | 5  | I  | 17 | 2195.2507      | 1098.1293       | 732.4221        |
| 581.4027       | 291.2052        | 6  | A  | 16 | 2082.1667      | 1041.5873       | 694.7274        |
| 728.4711       | 364.7394        | 7  | F  | 15 | 2011.1296      | 1006.0687       | 671.0484        |
| 799.5082       | 400.2580        | 8  | A  | 14 | 1864.0611      | 932.5345        | 622.0256        |
| 927.5668       | 464.2873        | 9  | Q  | 13 | 1793.0240      | 897.0159        | 598.3466        |
| 1090.6301      | 545.8190        | 10 | Y  | 12 | 1664.9655      | 832.9866        | 555.6604        |
| 1203.7142      | 602.3610        | 11 | L  | 11 | 1501.9021      | 751.4550        | 501.3059        |
| 1331.7727      | 666.3903        | 12 | Q  | 10 | 1388.8181      | 694.9129        | 463.6112        |
| 1459.8313      | 730.4196        | 13 | Q  | 9  | 1260.7595      | 630.8837        | 420.9250        |
| 1721.1008      | 861.0543        | 14 | C  | 8  | 1132.7009      | 566.8544        | 378.2389        |
| 1818.1536      | 909.5807        | 15 | P  | 7  | 871.4314       | 436.2196        | 291.1490        |
| 1965.2220      | 983.1149        | 16 | F  | 6  | 774.3786       | 387.6932        | 258.7981        |
| 2094.2646      | 1047.6362       | 17 | E  | 5  | 627.3102       | 314.1590        | 209.7753        |
| 2209.2915      | 1105.1497       | 18 | D  | 4  | 498.2676       | 249.6377        | 166.7611        |
| 2346.3505      | 1173.6791       | 19 | H  | 3  | 383.2407       | 192.1243        | 128.4188        |
| 2445.4189      | 1223.2133       | 20 | V  | 2  | 246.1818       | 123.5948        | 82.7325         |
|                |                 | 21 | K  | 1  | 147.1134       | 74.0606         | 49.7097         |

C (14) : +261.27

X-range: 200 - 1800  
 MassTol: 0.950 Y-zoom: 1.00  
 ImageSize: Sm Lg  
 MassType: AVG MONO  
 Axis: 1 2  
 Label: I M -  
 Ions: a + 2+ 3+ b + 2+ 3+ c + 2+ 3+ x + 2+ 3+ y + 2+ 3+ z + 2+ 3+  
 hide H<sub>2</sub>O/NH<sub>3</sub> zoom 112-122 zoom 124-133  
 GO

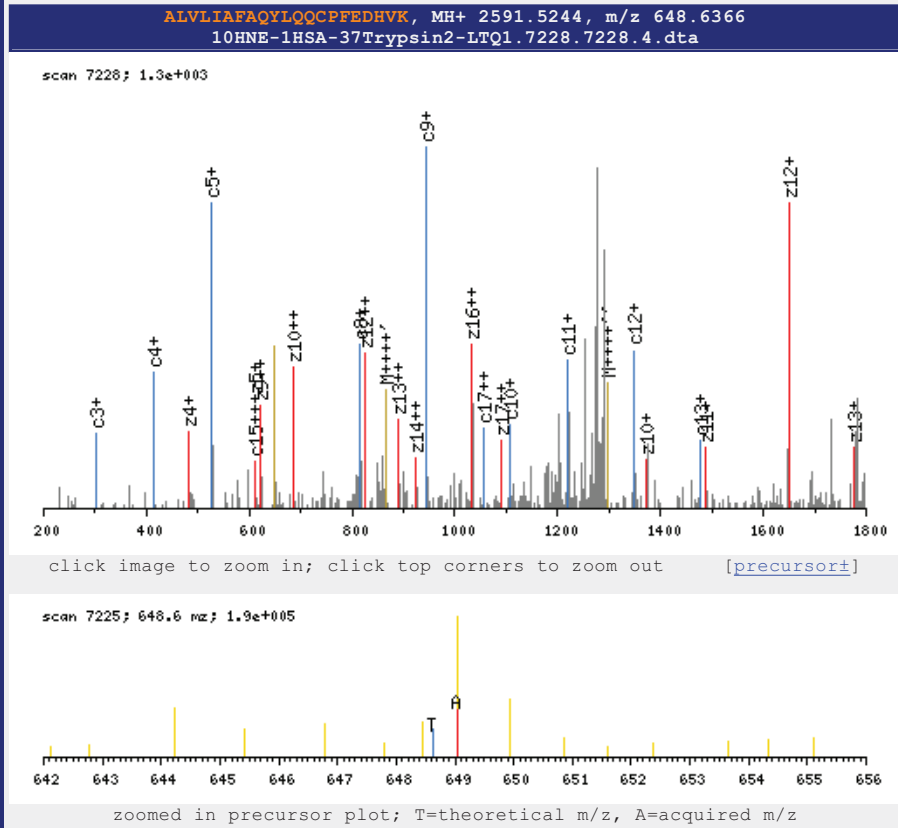

| c <sup>+</sup> | c <sup>2+</sup> | c <sup>3+</sup> | #  | AA | #  | z <sup>+</sup> | z <sup>2+</sup> | z <sup>3+</sup> |
|----------------|-----------------|-----------------|----|----|----|----------------|-----------------|-----------------|
| 89.0715        | 45.0397         | 30.3624         | 1  | A  | 21 |                |                 |                 |
| 202.1556       | 101.5817        | 68.0571         | 2  | L  | 20 | 2504.4686      | 1252.7382       | 835.4947        |
| 301.2240       | 151.1159        | 101.0799        | 3  | V  | 19 | 2391.3845      | 1196.1962       | 797.8000        |
| 414.3080       | 207.6579        | 138.7746        | 4  | L  | 18 | 2292.3161      | 1146.6620       | 764.7772        |
| 527.3921       | 264.2000        | 176.4692        | 5  | I  | 17 | 2179.2320      | 1090.1199       | 727.0826        |
| 598.4292       | 299.7185        | 200.1483        | 6  | A  | 16 | 2066.1480      | 1033.5779       | 689.3879        |
| 745.4976       | 373.2527        | 249.1711        | 7  | F  | 15 | 1995.1108      | 998.0593        | 665.7088        |
| 816.5347       | 408.7713        | 272.8501        | 8  | A  | 14 | 1848.0424      | 924.5251        | 616.6860        |
| 944.5933       | 472.8006        | 315.5363        | 9  | Q  | 13 | 1777.0053      | 889.0066        | 593.0070        |
| 1107.6566      | 554.3322        | 369.8908        | 10 | Y  | 12 | 1648.9467      | 824.9773        | 550.3208        |
| 1220.7407      | 610.8743        | 407.5855        | 11 | L  | 11 | 1485.8834      | 743.4456        | 495.9664        |
| 1348.7993      | 674.9036        | 450.2716        | 12 | Q  | 10 | 1372.7993      | 686.9036        | 458.2717        |
| 1476.8579      | 738.9328        | 492.9578        | 13 | Q  | 9  | 1244.7408      | 622.8743        | 415.5855        |
| 1738.1274      | 869.5676        | 580.0477        | 14 | C  | 8  | 1116.6822      | 558.8450        | 372.8993        |
| 1835.1801      | 918.0940        | 612.3986        | 15 | P  | 7  | 855.4127       | 428.2102        | 285.8094        |
| 1982.2486      | 991.6282        | 661.4214        | 16 | F  | 6  | 758.3599       | 379.6839        | 253.4585        |
| 2111.2911      | 1056.1495       | 704.4356        | 17 | E  | 5  | 611.2915       | 306.1497        | 204.4357        |
| 2226.3181      | 1113.6630       | 742.7779        | 18 | D  | 4  | 482.2489       | 241.6284        | 161.4215        |
| 2363.3770      | 1182.1924       | 788.4642        | 19 | H  | 3  | 367.2220       | 184.1149        | 123.0792        |
| 2462.4454      | 1231.7266       | 821.4870        | 20 | V  | 2  | 230.1630       | 115.5854        | 77.3929         |
|                |                 |                 | 21 | K  | 1  | 131.0946       | 66.0512         | 44.3701         |

C(14):+261.27

X-range: 0 -0  
 MassTol: Y-zoom: 0.950 1.00  
 ImageSize:  Sm  Lg  
 MassType:  AVG  MONO  
 Axis:  1  2  
 Label:  I  M  -  
 Ions: a  +  2+  3+  
 b  +  2+  3+  
 c  +  2+  3+  
 x  +  2+  3+  
 y  +  2+  3+  
 z  +  2+  3+  
 hide H<sub>2</sub>O/NH<sub>3</sub>   
 zoom 112-122   
 zoom 124-133   
 GO

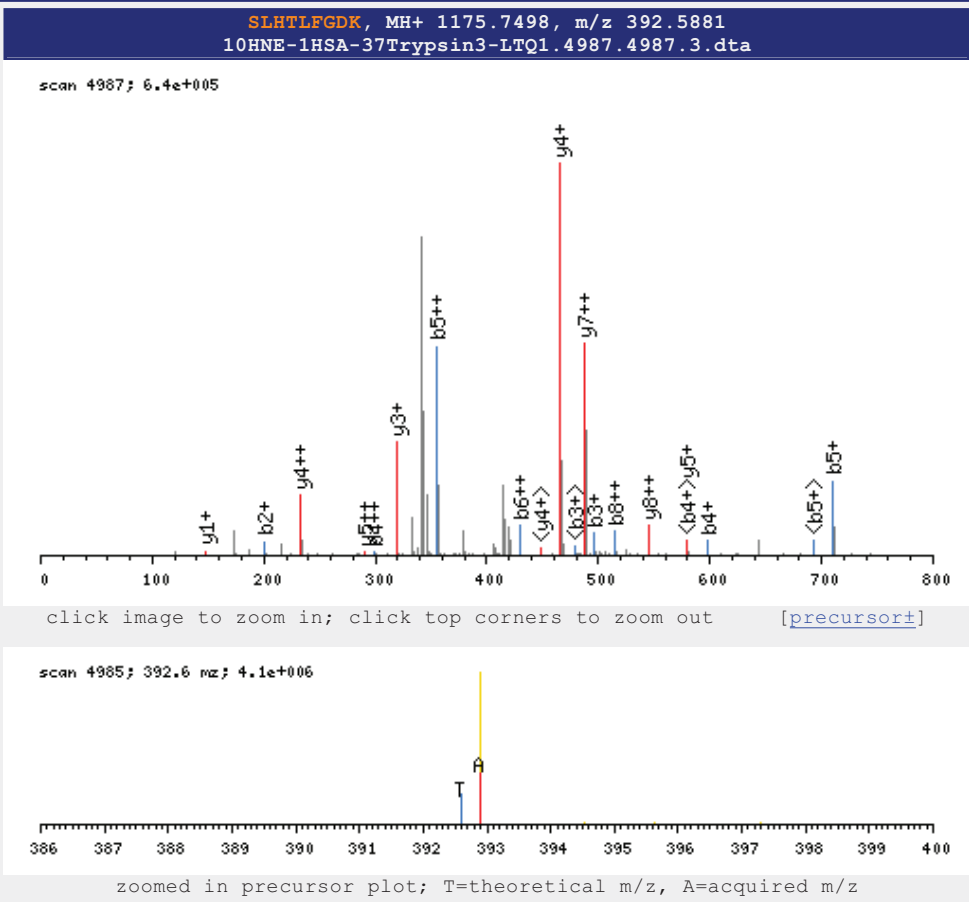

| b <sup>+</sup> | b <sup>2+</sup> | # | AA | # | y <sup>+</sup> | y <sup>2+</sup> | y <sup>3+</sup> |
|----------------|-----------------|---|----|---|----------------|-----------------|-----------------|
| 88.0399        | 44.5238         | 1 | S  | 9 |                |                 |                 |
| 201.1239       | 101.0659        | 2 | L  | 8 | 1088.7178      | 544.8628        | 363.5778        |
| 496.3957       | 248.7018        | 3 | H  | 7 | 975.6337       | 488.3208        | 325.8831        |
| 597.4434       | 299.2256        | 4 | T  | 6 | 680.3619       | 340.6849        | 227.4592        |
| 710.5274       | 355.7676        | 5 | L  | 5 | 579.3142       | 290.1610        | 193.7766        |
| 857.5959       | 429.3018        | 6 | F  | 4 | 466.2302       | 233.6190        | 156.0819        |
| 914.6173       | 457.8126        | 7 | G  | 3 | 319.1618       | 160.0848        | 107.0591        |
| 1029.6443      | 515.3260        | 8 | D  | 2 | 262.1403       | 131.5741        | 88.0520         |
|                |                 | 9 | K  | 1 | 147.1134       | 74.0606         | 49.7097         |

H(3) : +295.27

X-range: 200 - 1200  
 MassTol: Y-zoom: 0.950 1.00  
 ImageSize:  Sm  Lg  
 MassType:  AVG  MONO  
 Axis:  1  2  
 Label:  I  M  -  
 Ions: a  +  2+  3+  
 b  +  2+  3+  
 c  +  2+  3+  
 x  +  2+  3+  
 y  +  2+  3+  
 z  +  2+  3+  
 hide H<sub>2</sub>O/NH<sub>3</sub>   
 zoom 112-122   
 zoom 124-133   
 GO

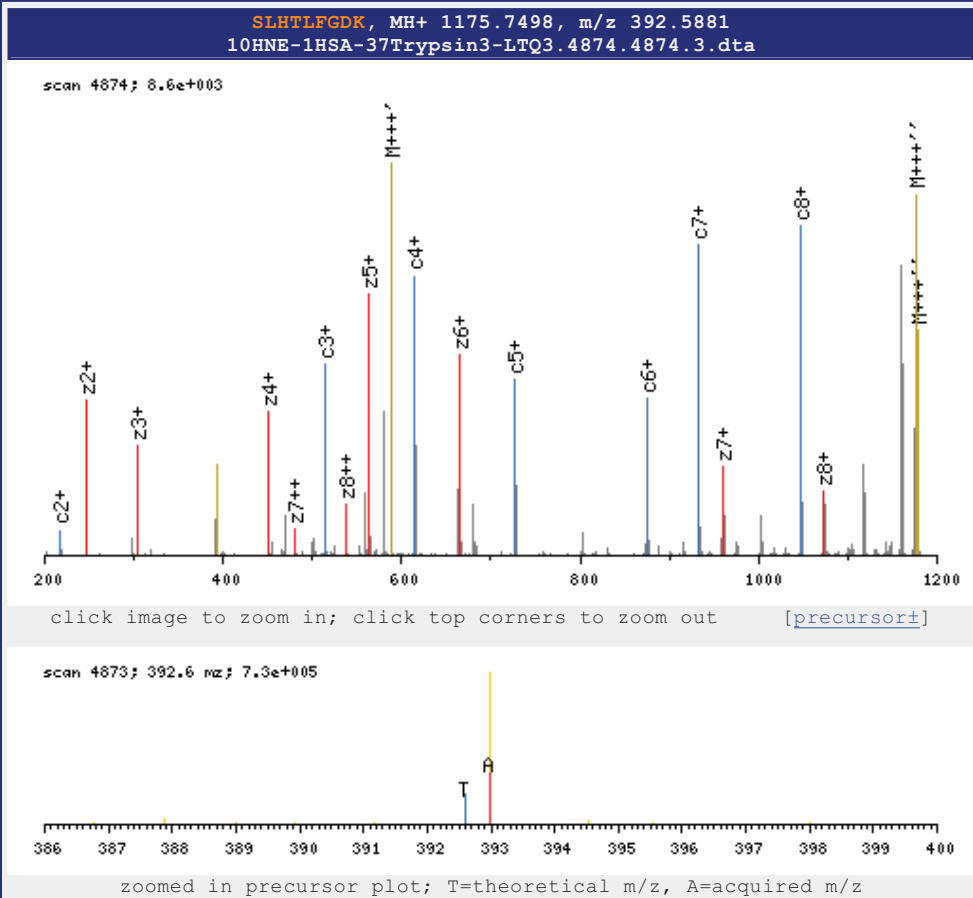

| c <sup>+</sup> | c <sup>2+</sup> | # | AA | # | z <sup>+</sup> | z <sup>2+</sup> | z <sup>3+</sup> |
|----------------|-----------------|---|----|---|----------------|-----------------|-----------------|
| 105.0664       | 53.0371         | 1 | S  | 9 |                |                 |                 |
| 218.1505       | 109.5791        | 2 | L  | 8 | 1072.6990      | 536.8534        | 358.2382        |
| 513.4222       | 257.2150        | 3 | H  | 7 | 959.6150       | 480.3114        | 320.5435        |
| 614.4699       | 307.7389        | 4 | T  | 6 | 664.3432       | 332.6755        | 222.1196        |
| 727.5540       | 364.2809        | 5 | L  | 5 | 563.2955       | 282.1517        | 188.4371        |
| 874.6224       | 437.8151        | 6 | F  | 4 | 450.2114       | 225.6096        | 150.7424        |
| 931.6439       | 466.3258        | 7 | G  | 3 | 303.1430       | 152.0754        | 101.7196        |
| 1046.6708      | 523.8393        | 8 | D  | 2 | 246.1216       | 123.5647        | 82.7124         |
|                |                 | 9 | K  | 1 | 131.0946       | 66.0512         | 44.3701         |

H(3):+295.27

X-range:

200 - 1200

MassTol: Y-zoom:

0.950 1.00

ImageSize:

Sm  Lg

MassType:

AVG  MONO

Axis:

1  2

Label:

I  M  -

Ions:

a  +  2+  3+

b  +  2+  3+

c  +  2+  3+

x  +  2+  3+

y  +  2+  3+

z  +  2+  3+

hide H<sub>2</sub>O/NH<sub>3</sub>

zoom 112-122

zoom 124-133

GO

SLHTLFGDKLCTVATLR, MH+ 2090.3772, m/z 697.4639  
10HNE-1HSA-37Trypsin5-LTQ3.5493.5493.3.dta

scan 5493; 2.8e+004

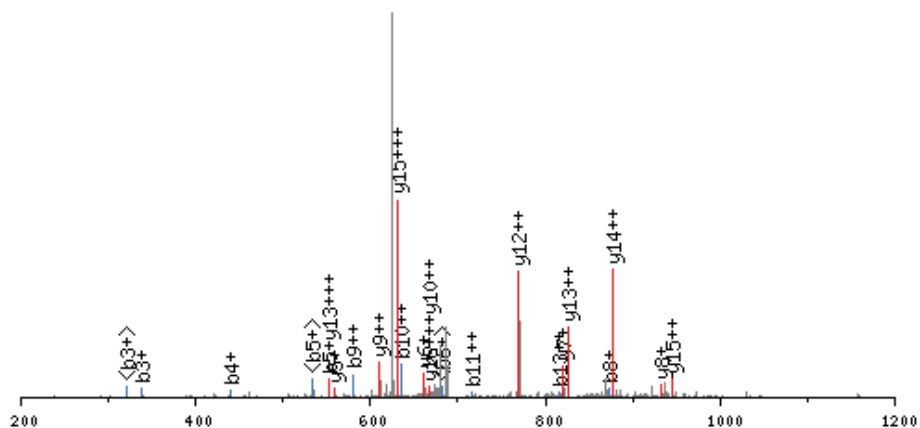

click image to zoom in; click top corners to zoom out [precursor±]

scan 5489; 697.5 m/z; 2.2e+005

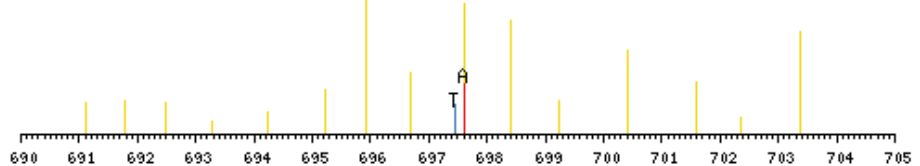

zoomed in precursor plot; T=theoretical m/z, A=acquired m/z

| b <sup>+</sup> | b <sup>2+</sup> | #  | AA | #  | y <sup>+</sup> | y <sup>2+</sup> | y <sup>3+</sup> |
|----------------|-----------------|----|----|----|----------------|-----------------|-----------------|
| 88.0399        | 44.5238         | 1  | S  | 17 |                |                 |                 |
| 201.1239       | 101.0659        | 2  | L  | 16 | 2003.3451      | 1002.1765       | 668.4536        |
| 338.1828       | 169.5953        | 3  | H  | 15 | 1890.2611      | 945.6344        | 630.7589        |
| 439.2305       | 220.1192        | 4  | T  | 14 | 1753.2022      | 877.1050        | 585.0726        |
| 552.3146       | 276.6612        | 5  | L  | 13 | 1652.1545      | 826.5812        | 551.3900        |
| 699.3830       | 350.1954        | 6  | F  | 12 | 1539.0704      | 770.0391        | 513.6954        |
| 756.4044       | 378.7061        | 7  | G  | 11 | 1392.0020      | 696.5049        | 464.6726        |
| 871.4314       | 436.2196        | 8  | D  | 10 | 1334.9805      | 667.9942        | 445.6654        |
| 1157.7362      | 579.3720        | 9  | K  | 9  | 1219.9536      | 610.4807        | 407.3231        |
| 1270.8202      | 635.9140        | 10 | L  | 8  | 933.6488       | 467.3283        | 311.8882        |
| 1430.9805      | 715.9942        | 11 | C  | 7  | 820.5647       | 410.7863        | 274.1935        |
| 1532.0282      | 766.5180        | 12 | T  | 6  | 660.4044       | 330.7061        | 220.8067        |
| 1631.0966      | 816.0522        | 13 | V  | 5  | 559.3568       | 280.1823        | 187.1241        |
| 1702.1337      | 851.5708        | 14 | A  | 4  | 460.2884       | 230.6481        | 154.1013        |
| 1803.1814      | 902.0946        | 15 | T  | 3  | 389.2512       | 195.1295        | 130.4223        |
| 1916.2655      | 958.6367        | 16 | L  | 2  | 288.2036       | 144.6057        | 96.7397         |
|                |                 | 17 | R  | 1  | 175.1195       | 88.0637         | 59.0451         |

K(9):+286.30 C(11):+160.16

X-range: 200 - 1800  
 MassTol: 0.950 Y-zoom: 1.00  
 ImageSize:  Sm  Lg  
 MassType:  AVG  MONO  
 Axis:  1  2  
 Label:  I  M  -  
 Ions: a  +  2+  3+  
 b  +  2+  3+  
 c  +  2+  3+  
 x  +  2+  3+  
 y  +  2+  3+  
 z  +  2+  3+  
 hide H<sub>2</sub>O/NH<sub>3</sub>   
 zoom 112-122   
 zoom 124-133   
 GO

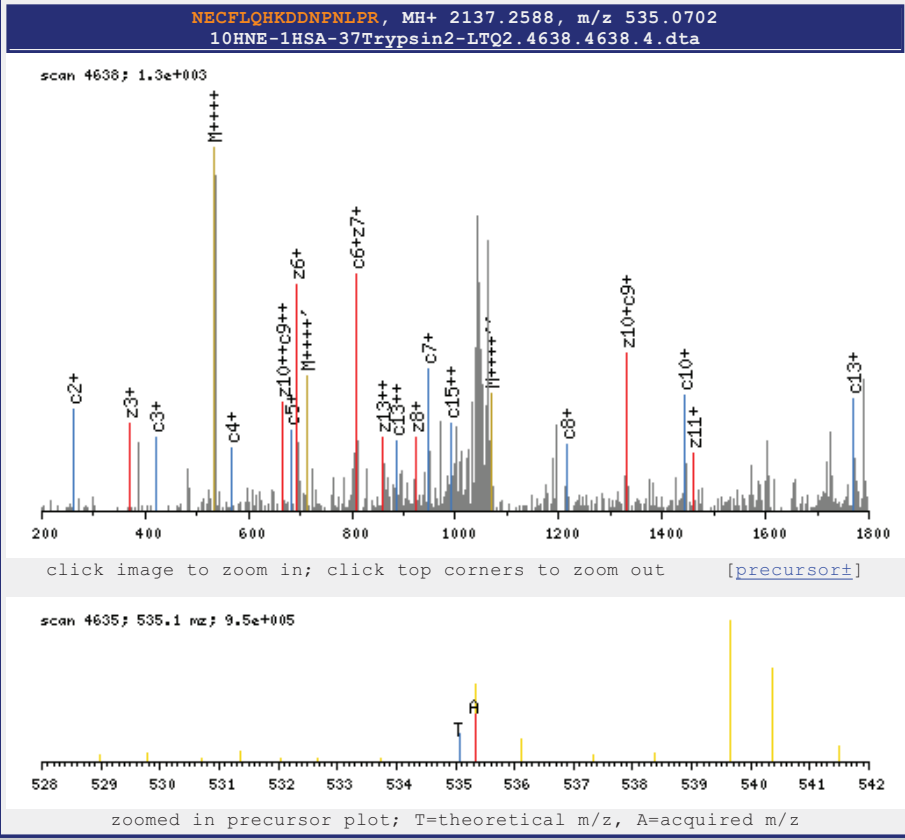

| c <sup>+</sup> | c <sup>2+</sup> | c <sup>3+</sup> | #  | AA | #  | z <sup>+</sup> | z <sup>2+</sup> | z <sup>3+</sup> |
|----------------|-----------------|-----------------|----|----|----|----------------|-----------------|-----------------|
| 132.0773       | 66.5426         | 44.6977         | 1  | N  | 16 |                |                 |                 |
| 261.1199       | 131.0639        | 87.7118         | 2  | E  | 15 | 2007.1972      | 1004.1025       | 669.7376        |
| 421.2802       | 211.1440        | 141.0986        | 3  | C  | 14 | 1878.1546      | 939.5812        | 626.7234        |
| 568.3486       | 284.6782        | 190.1214        | 4  | F  | 13 | 1717.9943      | 859.5011        | 573.3366        |
| 681.4327       | 341.2202        | 227.8161        | 5  | L  | 12 | 1570.9259      | 785.9669        | 524.3138        |
| 809.4913       | 405.2495        | 270.5023        | 6  | Q  | 11 | 1457.8418      | 729.4248        | 486.6192        |
| 946.5502       | 473.7790        | 316.1886        | 7  | H  | 10 | 1329.7832      | 665.3955        | 443.9330        |
| 1214.8444      | 607.9261        | 405.6200        | 8  | K  | 9  | 1192.7243      | 596.8661        | 398.2467        |
| 1329.8713      | 665.4396        | 443.9623        | 9  | D  | 8  | 924.4301       | 462.7190        | 308.8153        |
| 1444.8983      | 722.9530        | 482.3046        | 10 | D  | 7  | 809.4032       | 405.2055        | 270.4729        |
| 1558.9412      | 779.9745        | 520.3189        | 11 | N  | 6  | 694.3762       | 347.6920        | 232.1306        |
| 1655.9940      | 828.5009        | 552.6699        | 12 | P  | 5  | 580.3333       | 290.6706        | 194.1163        |
| 1770.0369      | 885.5224        | 590.6842        | 13 | N  | 4  | 483.2805       | 242.1442        | 161.7654        |
| 1883.1209      | 942.0644        | 628.3789        | 14 | L  | 3  | 369.2376       | 185.1227        | 123.7511        |
| 1980.1737      | 990.5908        | 660.7298        | 15 | P  | 2  | 256.1535       | 128.5807        | 86.0564         |
|                |                 |                 | 16 | R  | 1  | 159.1008       | 80.0543         | 53.7055         |

C(3):+160.16 K(8):+268.29

X-range: 0 - 0  
 MassTol: Y-zoom: 0.950 1.00  
 ImageSize: Sm Lg  
 MassType: AVG MONO  
 Axis: 1 2  
 Label: I M -  
 Ions: a + 2+ 3+  
 b + 2+ 3+  
 c + 2+ 3+  
 x + 2+ 3+  
 y + 2+ 3+  
 z + 2+ 3+  
 hide H<sub>2</sub>O/NH<sub>3</sub>  
 zoom 112-122  
 zoom 124-133  
 GO

LVRPEVDVMCTAFHDNEETFLK, MH+ 2808.6071, m/z 936.8739  
 10HNE-1HSA-37Trypsin2-LTQ3.5939.5939.3.dta

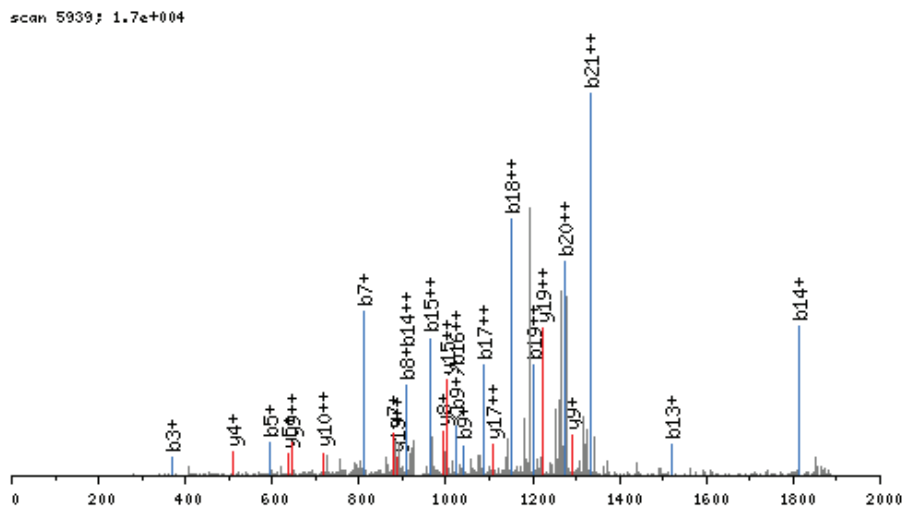

click image to zoom in; click top corners to zoom out [precursor±]

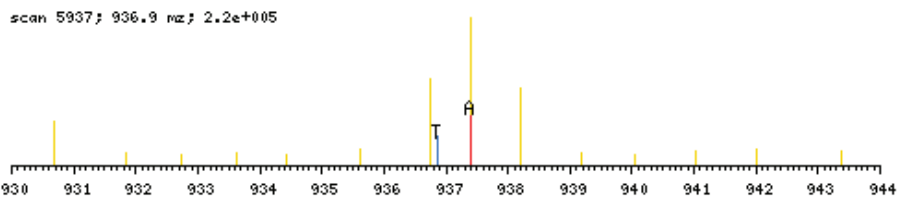

zoomed in precursor plot; T=theoretical m/z, A=acquired m/z

| b <sup>+</sup> | b <sup>2+</sup> | #  | AA | #  | y <sup>+</sup> | y <sup>2+</sup> | y <sup>3+</sup> |
|----------------|-----------------|----|----|----|----------------|-----------------|-----------------|
| 114.0919       | 57.5499         | 1  | L  | 22 |                |                 |                 |
| 213.1603       | 107.0841        | 2  | V  | 21 | 2695.5230      | 1348.2654       | 899.1795        |
| 369.2614       | 185.1346        | 3  | R  | 20 | 2596.4546      | 1298.7312       | 866.1567        |
| 466.3142       | 233.6610        | 4  | P  | 19 | 2440.3535      | 1220.6806       | 814.1230        |
| 595.3568       | 298.1823        | 5  | E  | 18 | 2343.3007      | 1172.1543       | 781.7721        |
| 694.4252       | 347.7165        | 6  | V  | 17 | 2214.2581      | 1107.6330       | 738.7579        |
| 809.4521       | 405.2300        | 7  | D  | 16 | 2115.1897      | 1058.0988       | 705.7351        |
| 908.5205       | 454.7642        | 8  | V  | 15 | 2000.1628      | 1000.5853       | 667.3928        |
| 1039.5610      | 520.2844        | 9  | M  | 14 | 1901.0943      | 951.0511        | 634.3700        |
| 1199.7213      | 600.3646        | 10 | C  | 13 | 1770.0539      | 885.5308        | 590.6898        |
| 1300.7690      | 650.8884        | 11 | T  | 12 | 1609.8936      | 805.4507        | 537.3031        |
| 1371.8061      | 686.4070        | 12 | A  | 11 | 1508.8459      | 754.9268        | 503.6205        |
| 1518.8745      | 759.9412        | 13 | F  | 10 | 1437.8088      | 719.4083        | 479.9415        |
| 1814.1463      | 907.5771        | 14 | H  | 9  | 1290.7403      | 645.8741        | 430.9187        |
| 1929.1733      | 965.0905        | 15 | D  | 8  | 995.4686       | 498.2382        | 332.4947        |
| 2043.2162      | 1022.1120       | 16 | N  | 7  | 880.4416       | 440.7247        | 294.1524        |
| 2172.2588      | 1086.6333       | 17 | E  | 6  | 766.3987       | 383.7033        | 256.1381        |
| 2301.3014      | 1151.1546       | 18 | E  | 5  | 637.3561       | 319.1820        | 213.1239        |
| 2402.3490      | 1201.6784       | 19 | T  | 4  | 508.3135       | 254.6607        | 170.1097        |
| 2549.4175      | 1275.2126       | 20 | F  | 3  | 407.2658       | 204.1368        | 136.4272        |
| 2662.5015      | 1331.7547       | 21 | L  | 2  | 260.1974       | 130.6026        | 87.4044         |
|                |                 | 22 | K  | 1  | 147.1134       | 74.0606         | 49.7097         |

C(10):+160.16 H(14):+295.27

X-range: 200 - 1800  
 MassTol: 0.950 Y-zoom: 2.00  
 ImageSize: Sm Lg  
 MassType: AVG MONO  
 Axis: 1 2  
 Label: I M -  
 Ions: a + 2+ 3+ b + 2+ 3+ c + 2+ 3+ x + 2+ 3+ y + 2+ 3+ z + 2+ 3+  
 hide H<sub>2</sub>O/NH<sub>3</sub> zoom 112-122 zoom 124-133  
 GO

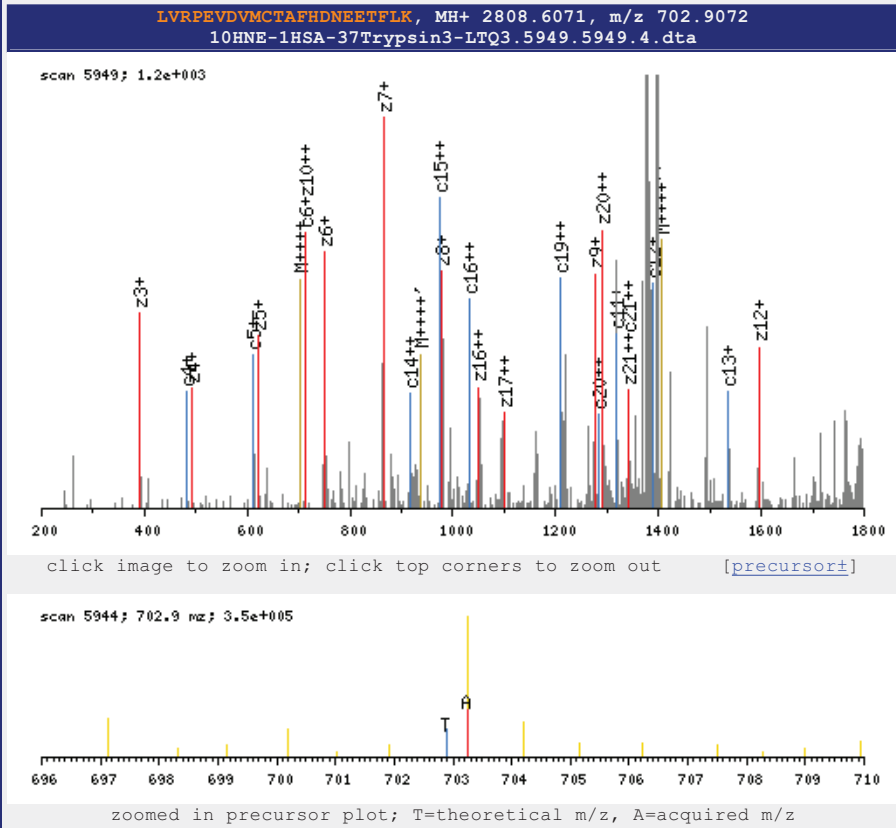

| c <sup>+</sup> | c <sup>2+</sup> | c <sup>3+</sup> | #  | AA | #  | z <sup>+</sup> | z <sup>2+</sup> | z <sup>3+</sup> |
|----------------|-----------------|-----------------|----|----|----|----------------|-----------------|-----------------|
| 131.1184       | 66.0631         | 44.3780         | 1  | L  | 22 |                |                 |                 |
| 230.1869       | 115.5973        | 77.4008         | 2  | V  | 21 | 2679.5043      | 1340.2560       | 893.8400        |
| 386.2880       | 193.6479        | 129.4345        | 3  | R  | 20 | 2580.4359      | 1290.7218       | 860.8172        |
| 483.3407       | 242.1743        | 161.7855        | 4  | P  | 19 | 2424.3347      | 1212.6713       | 808.7835        |
| 612.3833       | 306.6956        | 204.7997        | 5  | E  | 18 | 2327.2820      | 1164.1449       | 776.4325        |
| 711.4517       | 356.2298        | 237.8225        | 6  | V  | 17 | 2198.2394      | 1099.6236       | 733.4183        |
| 826.4787       | 413.7433        | 276.1648        | 7  | D  | 16 | 2099.1710      | 1050.0894       | 700.3955        |
| 925.5471       | 463.2775        | 309.1876        | 8  | V  | 15 | 1984.1440      | 992.5759        | 662.0532        |
| 1056.5876      | 528.7977        | 352.8677        | 9  | M  | 14 | 1885.0756      | 943.0417        | 629.0304        |
| 1216.7479      | 608.8779        | 406.2545        | 10 | C  | 13 | 1754.0351      | 877.5215        | 585.3503        |
| 1317.7956      | 659.4017        | 439.9371        | 11 | T  | 12 | 1593.8748      | 797.4413        | 531.9635        |
| 1388.8327      | 694.9202        | 463.6161        | 12 | A  | 11 | 1492.8271      | 746.9175        | 498.2809        |
| 1535.9011      | 768.4545        | 512.6389        | 13 | F  | 10 | 1421.7900      | 711.3989        | 474.6019        |
| 1831.1729      | 916.0903        | 611.0628        | 14 | H  | 9  | 1274.7216      | 637.8647        | 425.5791        |
| 1946.1998      | 973.6038        | 649.4052        | 15 | D  | 8  | 979.4498       | 490.2288        | 327.1552        |
| 2060.2427      | 1030.6253       | 687.4195        | 16 | N  | 7  | 864.4229       | 432.7154        | 288.8128        |
| 2189.2853      | 1095.1466       | 730.4337        | 17 | E  | 6  | 750.3800       | 375.6939        | 250.7985        |
| 2318.3279      | 1159.6679       | 773.4479        | 18 | E  | 5  | 621.3374       | 311.1726        | 207.7843        |
| 2419.3756      | 1210.1917       | 807.1304        | 19 | T  | 4  | 492.2948       | 246.6513        | 164.7701        |
| 2566.4440      | 1283.7259       | 856.1532        | 20 | F  | 3  | 391.2471       | 196.1275        | 131.0876        |
| 2679.5281      | 1340.2680       | 893.8479        | 21 | L  | 2  | 244.1787       | 122.5933        | 82.0648         |
|                |                 |                 | 22 | K  | 1  | 131.0946       | 66.0512         | 44.3701         |

C(10):+160.16 H(14):+295.27



X-range: 0 - 1200  
 MassTol: Y-zoom: 0.950 4.00  
 ImageSize:  Sm  Lg  
 Masstype:  AVG  MONO  
 Axis:  1  2  
 Label:  I  M  -  
 Ions: a  +  2+  3+  
 b  +  2+  3+  
 c  +  2+  3+  
 x  +  2+  3+  
 y  +  2+  3+  
 z  +  2+  3+  
 hide H<sub>2</sub>O/NH<sub>3</sub>   
 zoom 112-122   
 zoom 124-133   
 GO

KYLYEIAR, MH+ 1213.7988, m/z 607.4030  
 10HNE-1HSA-37Trypsin4-LTQ2.4655.4655.2.dta

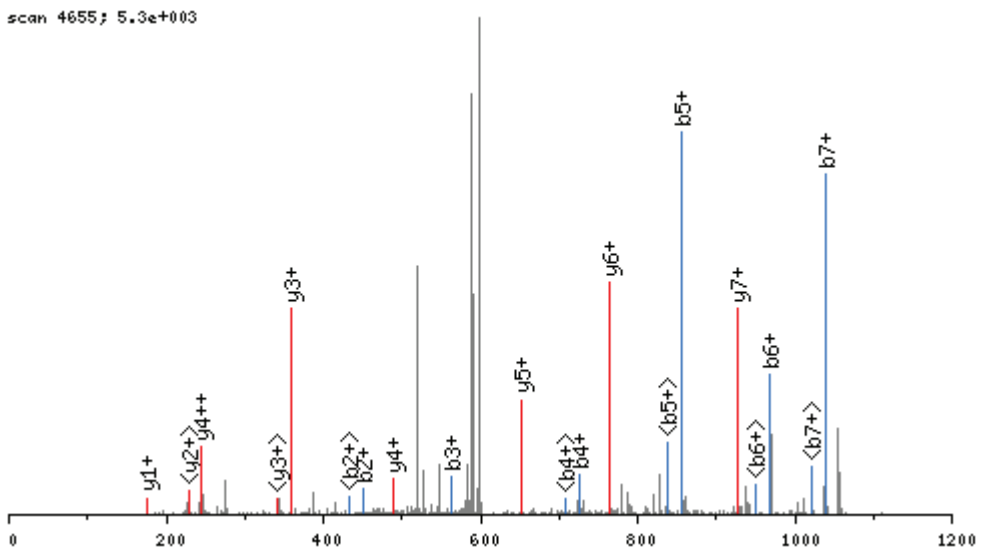

click image to zoom in; click top corners to zoom out [precursor±]

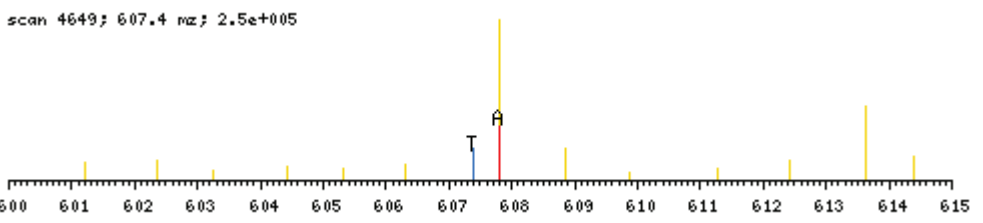

zoomed in precursor plot; T=theoretical m/z, A=acquired m/z

| b <sup>+</sup> | # AA | # | y <sup>+</sup> | y <sup>2+</sup>   |
|----------------|------|---|----------------|-------------------|
| 287.3126       | 1    | K | 8              |                   |
| 450.3759       | 2    | Y | 7              | 927.4940 464.2509 |
| 563.4600       | 3    | L | 6              | 764.4307 382.7192 |
| 726.5233       | 4    | Y | 5              | 651.3466 326.1772 |
| 855.5659       | 5    | E | 4              | 488.2833 244.6455 |
| 968.6500       | 6    | I | 3              | 359.2407 180.1243 |
| 1039.6871      | 7    | A | 2              | 246.1566 123.5822 |
|                | 8    | R | 1              | 175.1195 88.0637  |

K(1):+286.30

X-range: 0 - 0  
 MassTol: Y-zoom: 0.950 1.00  
 ImageSize:  Sm  Lg  
 MassType:  AVG  MONO  
 Axis:  1  2  
 Label:  I  M  -  
 Ions: a  +  2+  3+  
 b  +  2+  3+  
 c  +  2+  3+  
 x  +  2+  3+  
 y  +  2+  3+  
 z  +  2+  3+  
 hide H<sub>2</sub>O/NH<sub>3</sub>   
 zoom 112-122   
 zoom 124-133   
 GO

RHPYFYAPELLFFAK, MH+ 2057.2086, m/z 686.4077  
 10HNE-1HSA-37Trypsin5-LTQ3.6219.6219.3.dta

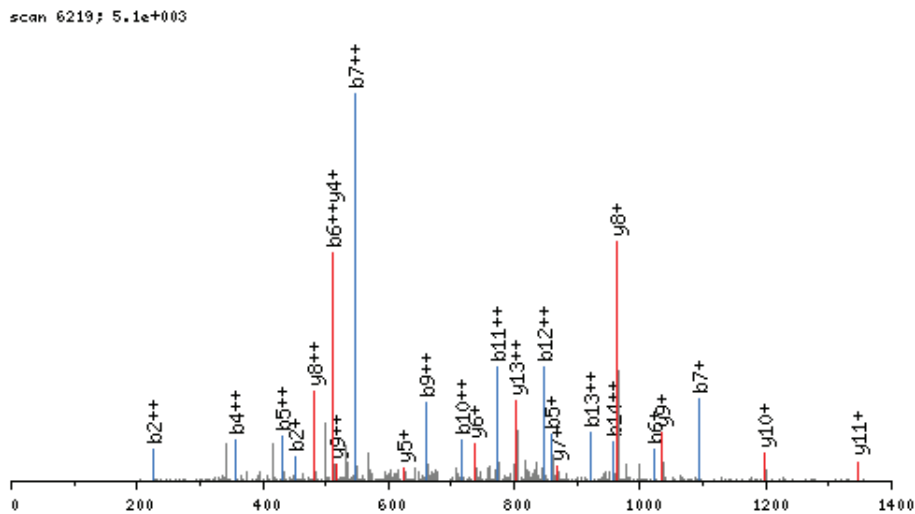

click image to zoom in; click top corners to zoom out [precursor±]

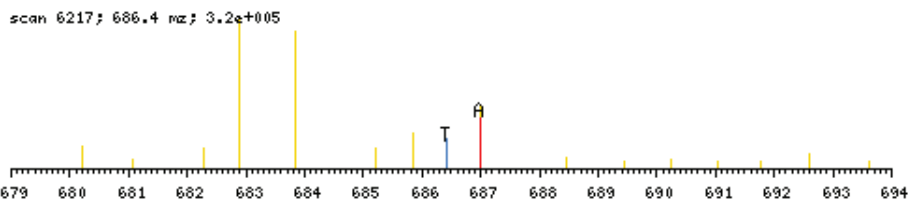

zoomed in precursor plot; T=theoretical m/z, A=acquired m/z

| b <sup>+</sup> | b <sup>2+</sup> | #  | AA | #  | y <sup>+</sup> | y <sup>2+</sup> | y <sup>3+</sup> |
|----------------|-----------------|----|----|----|----------------|-----------------|-----------------|
| 157.1089       | 79.0584         | 1  | R  | 15 |                |                 |                 |
| 452.3807       | 226.6943        | 2  | H  | 14 | 1901.1075      | 951.0577        | 634.3744        |
| 549.4335       | 275.2207        | 3  | P  | 13 | 1605.8357      | 803.4218        | 535.9505        |
| 712.4968       | 356.7523        | 4  | Y  | 12 | 1508.7830      | 754.8954        | 503.5995        |
| 859.5652       | 430.2865        | 5  | F  | 11 | 1345.7196      | 673.3637        | 449.2451        |
| 1022.6286      | 511.8182        | 6  | Y  | 10 | 1198.6512      | 599.8295        | 400.2223        |
| 1093.6657      | 547.3367        | 7  | A  | 9  | 1035.5879      | 518.2979        | 345.8678        |
| 1190.7184      | 595.8631        | 8  | P  | 8  | 964.5508       | 482.7793        | 322.1888        |
| 1319.7610      | 660.3844        | 9  | E  | 7  | 867.4980       | 434.2529        | 289.8379        |
| 1432.8451      | 716.9265        | 10 | L  | 6  | 738.4554       | 369.7316        | 246.8237        |
| 1545.9291      | 773.4685        | 11 | L  | 5  | 625.3714       | 313.1896        | 209.1290        |
| 1692.9976      | 847.0027        | 12 | F  | 4  | 512.2873       | 256.6476        | 171.4343        |
| 1840.0660      | 920.5369        | 13 | F  | 3  | 365.2189       | 183.1134        | 122.4115        |
| 1911.1031      | 956.0555        | 14 | A  | 2  | 218.1505       | 109.5791        | 73.3887         |
|                |                 | 15 | K  | 1  | 147.1134       | 74.0606         | 49.7097         |

H(2) : +295.27

X-range:

200 - 2000

MassTol: Y-zoom:

0.950 1.00

ImageSize:

 Sm  Lg

MassType:

 AVG  MONO

Axis:

 1  2

Label:

 I  M  -

Ions:

a  +  2+  3+b  +  2+  3+c  +  2+  3+x  +  2+  3+y  +  2+  3+z  +  2+  3+hide H<sub>2</sub>O/NH<sub>3</sub> zoom 112-122 zoom 124-133 

GO

RHPYFYAPELLFFAK, MH+ 2057.2086, m/z 686.4077  
10HNE-1HSA-37Trypsin5-LTQ4.8861.8861.3.dta

scan 8861; 1.3e+003

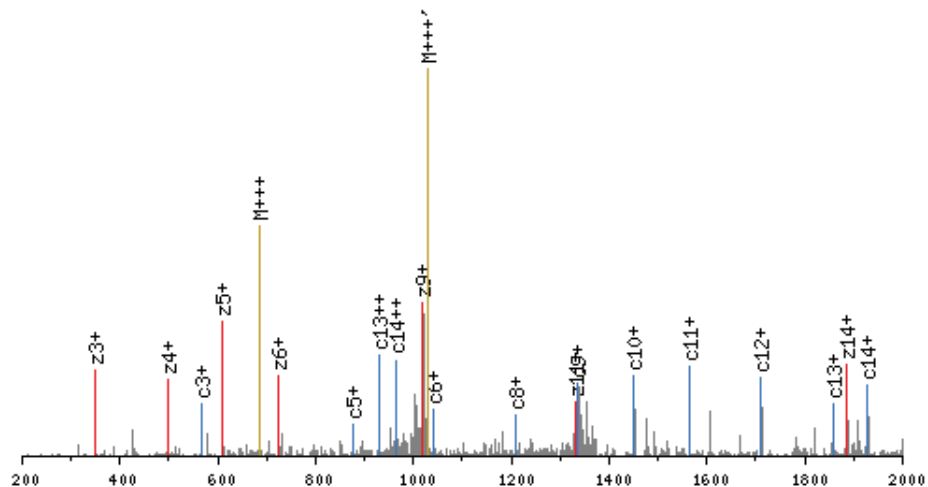

click image to zoom in; click top corners to zoom out [precursor±]

scan 8856; 686.4 m/z; 6.1e+005

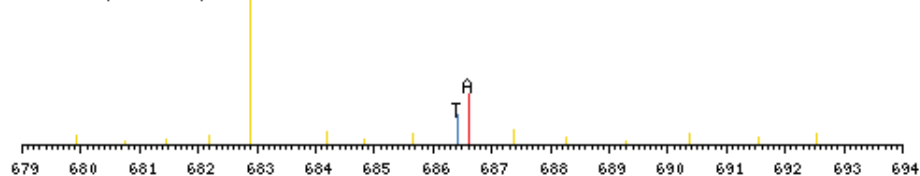

zoomed in precursor plot; T=theoretical m/z, A=acquired m/z

| c <sup>+</sup> | c <sup>2+</sup> | #  | AA | #  | z <sup>+</sup> | z <sup>2+</sup> | z <sup>3+</sup> |
|----------------|-----------------|----|----|----|----------------|-----------------|-----------------|
| 174.1355       | 87.5717         | 1  | R  | 15 |                |                 |                 |
| 469.4073       | 235.2075        | 2  | H  | 14 | 1885.0888      | 943.0483        | 629.0348        |
| 566.4600       | 283.7339        | 3  | P  | 13 | 1589.8170      | 795.4124        | 530.6109        |
| 729.5234       | 365.2656        | 4  | Y  | 12 | 1492.7642      | 746.8860        | 498.2600        |
| 876.5918       | 438.7998        | 5  | F  | 11 | 1329.7009      | 665.3544        | 443.9055        |
| 1039.6551      | 520.3315        | 6  | Y  | 10 | 1182.6325      | 591.8202        | 394.8827        |
| 1110.6922      | 555.8500        | 7  | A  | 9  | 1019.5692      | 510.2885        | 340.5283        |
| 1207.7450      | 604.3764        | 8  | P  | 8  | 948.5321       | 474.7699        | 316.8492        |
| 1336.7876      | 668.8977        | 9  | E  | 7  | 851.4793       | 426.2436        | 284.4983        |
| 1449.8716      | 725.4397        | 10 | L  | 6  | 722.4367       | 361.7223        | 241.4841        |
| 1562.9557      | 781.9818        | 11 | L  | 5  | 609.3526       | 305.1802        | 203.7894        |
| 1710.0241      | 855.5160        | 12 | F  | 4  | 496.2686       | 248.6382        | 166.0947        |
| 1857.0925      | 929.0502        | 13 | F  | 3  | 349.2002       | 175.1040        | 117.0719        |
| 1928.1296      | 964.5687        | 14 | A  | 2  | 202.1317       | 101.5698        | 68.0491         |
|                |                 | 15 | K  | 1  | 131.0946       | 66.0512         | 44.3701         |

H(2) : +295.27

X-range:

200 - 1400

MassTol: Y-zoom:

0.950 1.00

ImageSize:

Sm  Lg

MassType:

AVG  MONO

Axis:

1  2

Label:

I  M  -

Ions:

a  +  2+  3+

b  +  2+  3+

c  +  2+  3+

x  +  2+  3+

y  +  2+  3+

z  +  2+  3+

hide H<sub>2</sub>O/NH<sub>3</sub>

zoom 112-122

zoom 124-133

GO

RHPYFYAPELLFPAKR, MH+ 2213.3097, m/z 738.4414  
10HNE-1HSA-37Trypsin5-LTQ1.5395.5395.3.dta

scan 5395; 1.7e+003

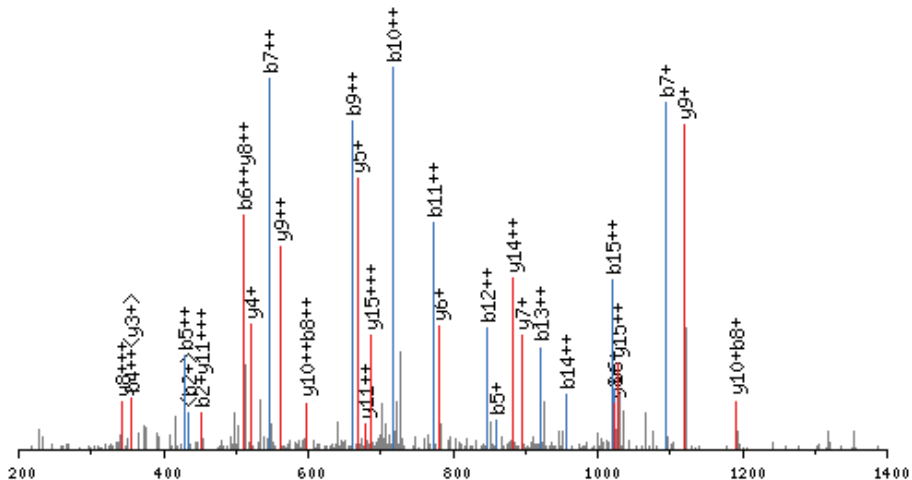

click image to zoom in; click top corners to zoom out [\[precursor±\]](#)

scan 5391; 738.4 m/z; 7.6e+005

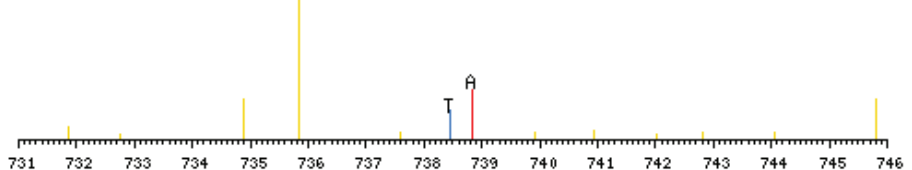

zoomed in precursor plot; T=theoretical m/z, A=acquired m/z

| b <sup>+</sup> | b <sup>2+</sup> | #  | AA | #  | y <sup>+</sup> | y <sup>2+</sup> | y <sup>3+</sup> |
|----------------|-----------------|----|----|----|----------------|-----------------|-----------------|
| 157.1089       | 79.0584         | 1  | R  | 16 |                |                 |                 |
| 452.3807       | 226.6943        | 2  | H  | 15 | 2057.2086      | 1029.1082       | 686.4081        |
| 549.4335       | 275.2207        | 3  | P  | 14 | 1761.9368      | 881.4723        | 587.9842        |
| 712.4968       | 356.7523        | 4  | Y  | 13 | 1664.8841      | 832.9460        | 555.6332        |
| 859.5652       | 430.2865        | 5  | F  | 12 | 1501.8207      | 751.4143        | 501.2788        |
| 1022.6286      | 511.8182        | 6  | Y  | 11 | 1354.7523      | 677.8801        | 452.2560        |
| 1093.6657      | 547.3367        | 7  | A  | 10 | 1191.6890      | 596.3484        | 397.9016        |
| 1190.7184      | 595.8631        | 8  | P  | 9  | 1120.6519      | 560.8299        | 374.2225        |
| 1319.7610      | 660.3844        | 9  | E  | 8  | 1023.5991      | 512.3035        | 341.8716        |
| 1432.8451      | 716.9265        | 10 | L  | 7  | 894.5565       | 447.7822        | 298.8574        |
| 1545.9291      | 773.4685        | 11 | L  | 6  | 781.4725       | 391.2401        | 261.1627        |
| 1692.9976      | 847.0027        | 12 | F  | 5  | 668.3884       | 334.6981        | 223.4680        |
| 1840.0660      | 920.5369        | 13 | F  | 4  | 521.3200       | 261.1639        | 174.4452        |
| 1911.1031      | 956.0555        | 14 | A  | 3  | 374.2516       | 187.6297        | 125.4224        |
| 2039.1981      | 1020.1029       | 15 | K  | 2  | 303.2145       | 152.1111        | 101.7434        |
|                |                 | 16 | R  | 1  | 175.1195       | 88.0637         | 59.0451         |

H(2):+295.27

X-range: 400 - 1800  
 MassTol: Y-zoom: 0.950 1.70  
 ImageSize:  Sm  Lg  
 MassType:  AVG  MONO  
 Axis:  1  2  
 Label:  I  M  -  
 Ions: a  +  2+  3+  
 b  +  2+  3+  
 c  +  2+  3+  
 x  +  2+  3+  
 y  +  2+  3+  
 z  +  2+  3+  
 hide H<sub>2</sub>O/NH<sub>3</sub>   
 zoom 112-122   
 zoom 124-133   
 GO

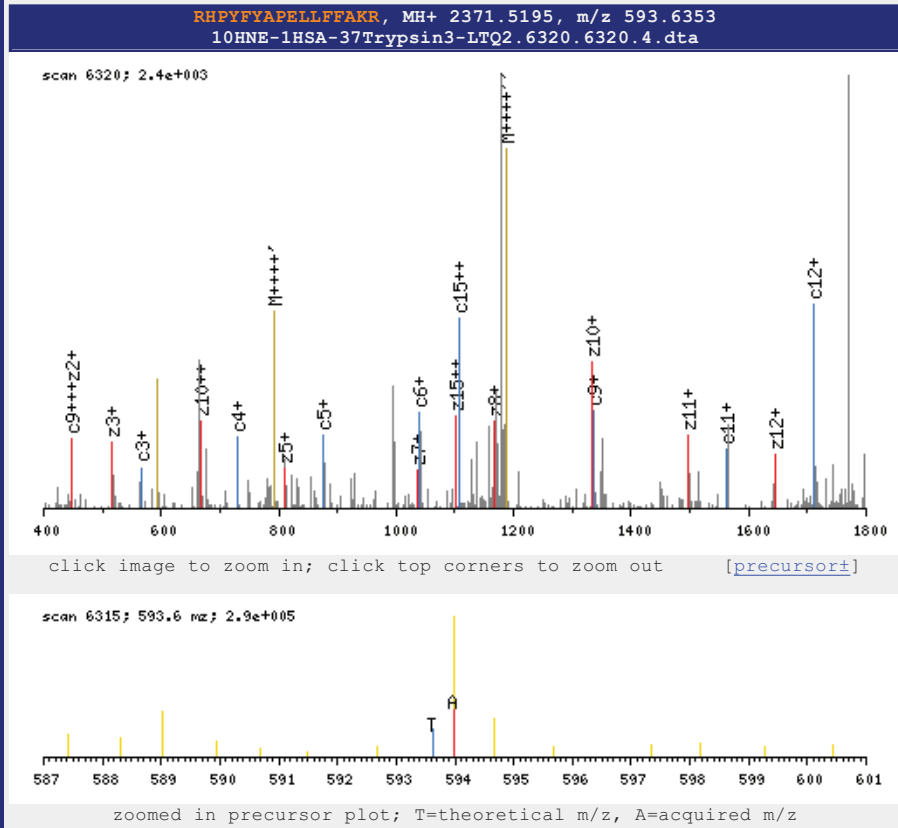

| c <sup>+</sup> | c <sup>2+</sup> | c <sup>3+</sup> | #  | AA | #  | z <sup>+</sup> | z <sup>2+</sup> | z <sup>3+</sup> |
|----------------|-----------------|-----------------|----|----|----|----------------|-----------------|-----------------|
| 174.1355       | 87.5717         | 58.7170         | 1  | R  | 16 |                |                 |                 |
| 469.4073       | 235.2075        | 157.1410        | 2  | H  | 15 | 2199.3997      | 1100.2038       | 733.8051        |
| 566.4600       | 283.7339        | 189.4919        | 3  | P  | 14 | 1904.1279      | 952.5679        | 635.3812        |
| 729.5234       | 365.2656        | 243.8463        | 4  | Y  | 13 | 1807.0752      | 904.0415        | 603.0303        |
| 876.5918       | 438.7998        | 292.8691        | 5  | F  | 12 | 1644.0118      | 822.5098        | 548.6758        |
| 1039.6551      | 520.3315        | 347.2236        | 6  | Y  | 11 | 1496.9434      | 748.9756        | 499.6530        |
| 1110.6922      | 555.8500        | 370.9026        | 7  | A  | 10 | 1333.8801      | 667.4440        | 445.2986        |
| 1207.7450      | 604.3764        | 403.2535        | 8  | P  | 9  | 1262.8430      | 631.9254        | 421.6195        |
| 1336.7876      | 668.8977        | 446.2677        | 9  | E  | 8  | 1165.7902      | 583.3990        | 389.2686        |
| 1449.8716      | 725.4397        | 483.9624        | 10 | L  | 7  | 1036.7476      | 518.8777        | 346.2544        |
| 1562.9557      | 781.9818        | 521.6571        | 11 | L  | 6  | 923.6636       | 462.3357        | 308.5597        |
| 1710.0241      | 855.5160        | 570.6799        | 12 | F  | 5  | 810.5795       | 405.7937        | 270.8650        |
| 1857.0925      | 929.0502        | 619.7027        | 13 | F  | 4  | 663.5111       | 332.2595        | 221.8422        |
| 1928.1296      | 964.5687        | 643.3818        | 14 | A  | 3  | 516.4427       | 258.7252        | 172.8194        |
| 2214.4344      | 1107.7211       | 738.8167        | 15 | K  | 2  | 445.4056       | 223.2067        | 149.1404        |
|                |                 |                 | 16 | R  | 1  | 159.1008       | 80.0543         | 53.7055         |

H(2):+295.27 K(15):+286.30

X-range: 200 - 1800  
 MassTol: Y-zoom: 0.950 1.00  
 ImageSize:  Sm  Lg  
 MassType:  AVG  MONO  
 Axis:  1  2  
 Label:  I  M  -  
 Ions: a  +  2+  3+  
 b  +  2+  3+  
 c  +  2+  3+  
 x  +  2+  3+  
 y  +  2+  3+  
 z  +  2+  3+  
 hide H<sub>2</sub>O/NH<sub>3</sub>   
 zoom 112-122   
 zoom 124-133   
 GO

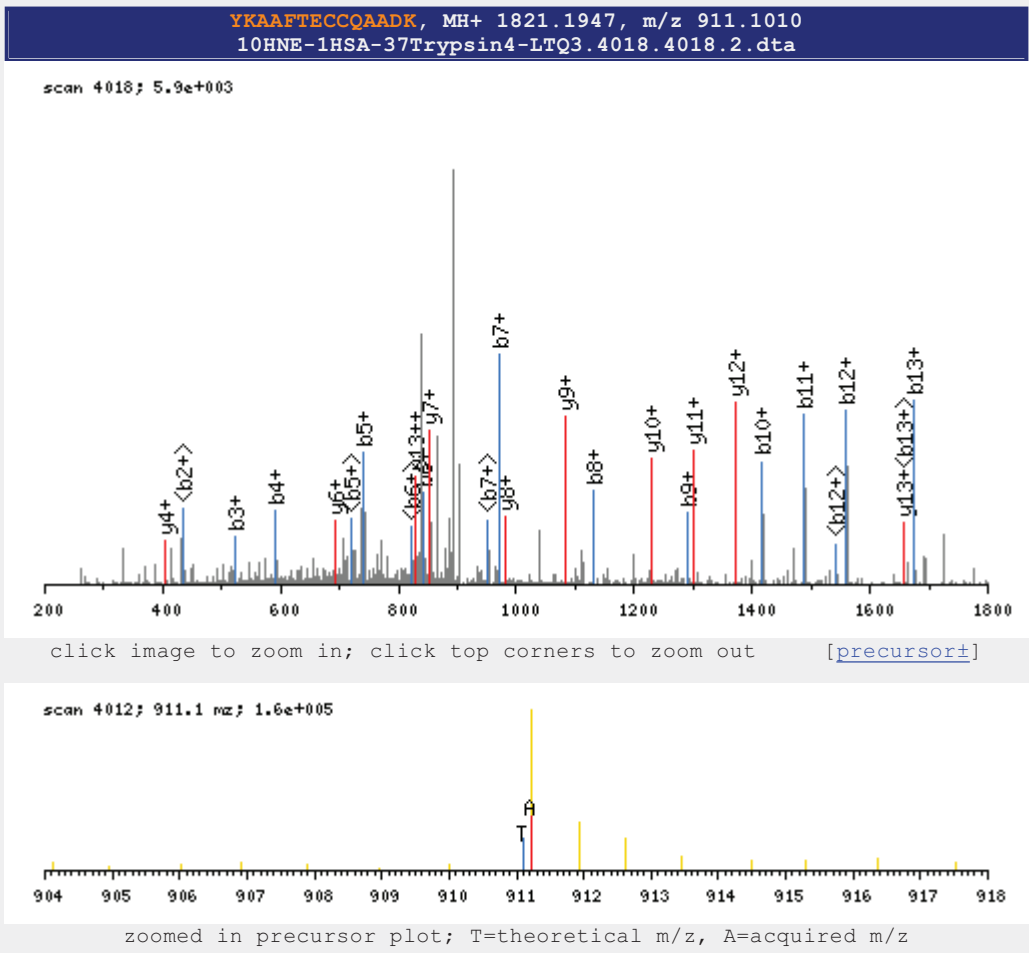

| b <sup>+</sup> | #  | AA | #  | y <sup>+</sup> | y <sup>2+</sup> |
|----------------|----|----|----|----------------|-----------------|
| 164.0712       | 1  | Y  | 14 |                |                 |
| 450.3759       | 2  | K  | 13 | 1658.1314      | 829.5696        |
| 521.4130       | 3  | A  | 12 | 1371.8266      | 686.4172        |
| 592.4502       | 4  | A  | 11 | 1300.7895      | 650.8987        |
| 739.5186       | 5  | F  | 10 | 1229.7524      | 615.3801        |
| 840.5663       | 6  | T  | 9  | 1082.6840      | 541.8459        |
| 969.6088       | 7  | E  | 8  | 981.6363       | 491.3221        |
| 1129.7691      | 8  | C  | 7  | 852.5937       | 426.8008        |
| 1289.9294      | 9  | C  | 6  | 692.4334       | 346.7206        |
| 1417.9880      | 10 | Q  | 5  | 532.2731       | 266.6405        |
| 1489.0251      | 11 | A  | 4  | 404.2145       | 202.6112        |
| 1560.0623      | 12 | A  | 3  | 333.1774       | 167.0926        |
| 1675.0892      | 13 | D  | 2  | 262.1403       | 131.5741        |
|                | 14 | K  | 1  | 147.1134       | 74.0606         |

K(2):+286.30 C(8):+160.16 C(9):+160.16

X-range: 200 - 1800  
 MassTol: Y-zoom: 0.950 1.00  
 ImageSize: Sm Lg  
 MassType: AVG MONO  
 Axis: 1 2  
 Label: I M -  
 Ions: a + 2+ 3+  
 b + 2+ 3+  
 c + 2+ 3+  
 x + 2+ 3+  
 y + 2+ 3+  
 z + 2+ 3+  
 hide H<sub>2</sub>O/NH<sub>3</sub>  
 zoom 112-122  
 zoom 124-133  
 GO

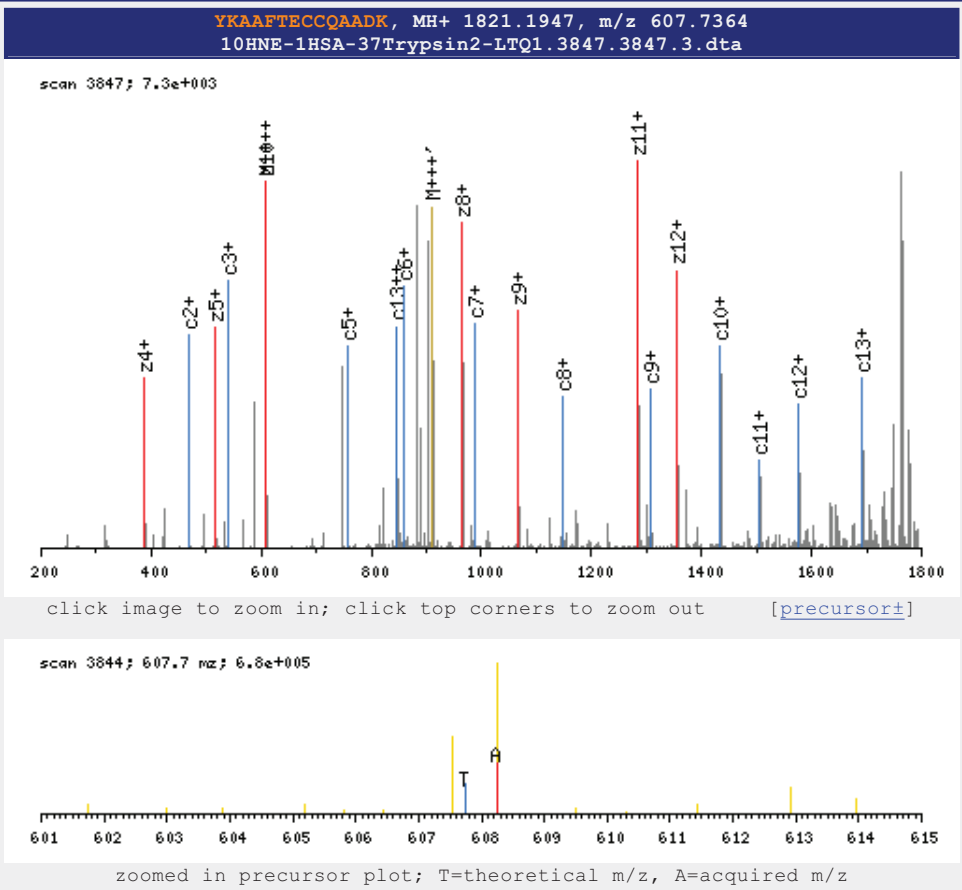

| c <sup>+</sup> | c <sup>2+</sup> | #  | AA | #  | z <sup>+</sup> | z <sup>2+</sup> | z <sup>3+</sup> |
|----------------|-----------------|----|----|----|----------------|-----------------|-----------------|
| 181.0977       | 91.0528         | 1  | Y  | 14 |                |                 |                 |
| 467.4025       | 234.2052        | 2  | K  | 13 | 1642.1127      | 821.5602        | 548.0428        |
| 538.4396       | 269.7237        | 3  | A  | 12 | 1355.8079      | 678.4079        | 452.6078        |
| 609.4767       | 305.2423        | 4  | A  | 11 | 1284.7708      | 642.8893        | 428.9288        |
| 756.5451       | 378.7765        | 5  | F  | 10 | 1213.7337      | 607.3707        | 405.2498        |
| 857.5928       | 429.3003        | 6  | T  | 9  | 1066.6652      | 533.8365        | 356.2270        |
| 986.6354       | 493.8216        | 7  | E  | 8  | 965.6176       | 483.3127        | 322.5444        |
| 1146.7957      | 573.9018        | 8  | C  | 7  | 836.5750       | 418.7914        | 279.5302        |
| 1306.9560      | 653.9819        | 9  | C  | 6  | 676.4147       | 338.7113        | 226.1434        |
| 1435.0146      | 718.0112        | 10 | Q  | 5  | 516.2544       | 258.6311        | 172.7567        |
| 1506.0517      | 753.5298        | 11 | A  | 4  | 388.1958       | 194.6018        | 130.0705        |
| 1577.0888      | 789.0483        | 12 | A  | 3  | 317.1587       | 159.0833        | 106.3914        |
| 1692.1157      | 846.5618        | 13 | D  | 2  | 246.1216       | 123.5647        | 82.7124         |
|                |                 | 14 | K  | 1  | 131.0946       | 66.0512         | 44.3701         |

K(2):+286.30 C(8):+160.16 C(9):+160.16

X-range: 200 - 1100  
 MassTol: Y-zoom: 0.950 4.00  
 ImageSize: Sm Lg  
 MassType: AVG MONO  
 Axis: 1 2  
 Label: I M -  
 Ions: a + 2+ 3+  
 b  +  2+  3+  
 c  +  2+  3+  
 x  +  2+  3+  
 y  +  2+  3+  
 z  +  2+  3+  
 hide H<sub>2</sub>O/NH<sub>3</sub>   
 zoom 112-122   
 zoom 124-133   
 GO

YKAAFTECCQADK, MH+ 1803.1842, m/z 601.7329  
 10HNE-1HSA-37Trypsin3-LTQ2.4214.4214.3.dta

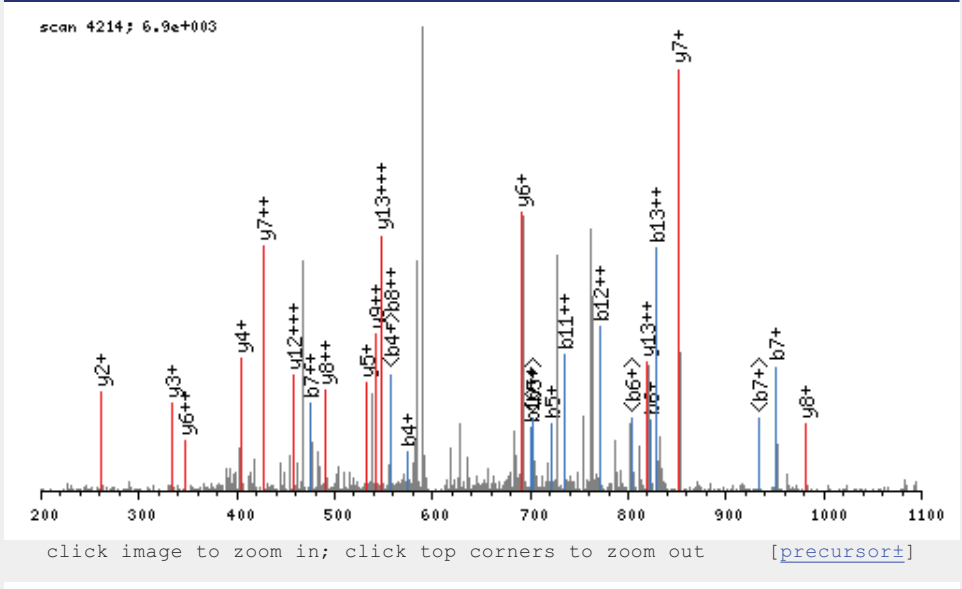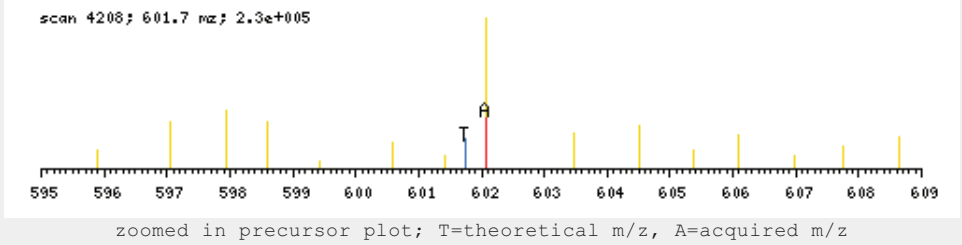

| b <sup>+</sup> | b <sup>2+</sup> | #  | AA | #  | y <sup>+</sup> | y <sup>2+</sup> | y <sup>3+</sup> |
|----------------|-----------------|----|----|----|----------------|-----------------|-----------------|
| 164.0712       | 82.5395         | 1  | Y  | 14 |                |                 |                 |
| 432.3654       | 216.6866        | 2  | K  | 13 | 1640.1208      | 820.5643        | 547.3788        |
| 503.4025       | 252.2052        | 3  | A  | 12 | 1371.8266      | 686.4172        | 457.9474        |
| 574.4396       | 287.7237        | 4  | A  | 11 | 1300.7895      | 650.8987        | 434.2684        |
| 721.5080       | 361.2579        | 5  | F  | 10 | 1229.7524      | 615.3801        | 410.5893        |
| 822.5557       | 411.7818        | 6  | T  | 9  | 1082.6840      | 541.8459        | 361.5665        |
| 951.5983       | 476.3031        | 7  | E  | 8  | 981.6363       | 491.3221        | 327.8840        |
| 1111.7586      | 556.3832        | 8  | C  | 7  | 852.5937       | 426.8008        | 284.8698        |
| 1271.9189      | 636.4634        | 9  | C  | 6  | 692.4334       | 346.7206        | 231.4830        |
| 1399.9775      | 700.4926        | 10 | Q  | 5  | 532.2731       | 266.6405        | 178.0963        |
| 1471.0146      | 736.0112        | 11 | A  | 4  | 404.2145       | 202.6112        | 135.4101        |
| 1542.0517      | 771.5298        | 12 | A  | 3  | 333.1774       | 167.0926        | 111.7310        |
| 1657.0786      | 829.0432        | 13 | D  | 2  | 262.1403       | 131.5741        | 88.0520         |
|                |                 | 14 | K  | 1  | 147.1134       | 74.0606         | 49.7097         |

K(2):+268.29 C(8):+160.16 C(9):+160.16



X-range:

200 - 1800

MassTol: Y-zoom:

0.950 1.00

ImageSize:

Sm  Lg

MassType:

AVG  MONO

Axis:

1  2

Label:

I  M  -

Ions:

a  +  2+  3+

b  +  2+  3+

c  +  2+  3+

x  +  2+  3+

y  +  2+  3+

z  +  2+  3+

hide H<sub>2</sub>O/NH<sub>3</sub>

zoom 112-122

zoom 124-133

GO

YKAAFTECCQADK, MH+ 1803.1842, m/z 601.7329  
10HNE-1HSA-37Trypsin5-LTQ4.4295.4295.3.dta

scan 4295; 3.6e+003

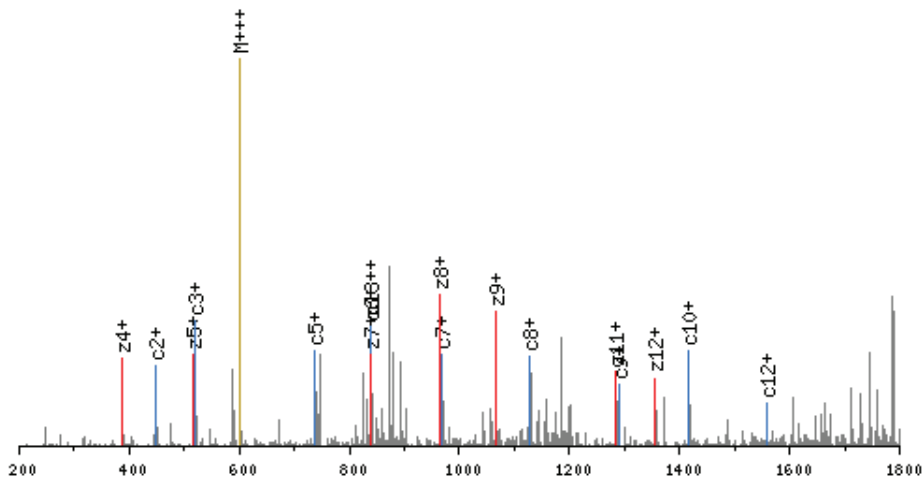

click image to zoom in; click top corners to zoom out [precursor±]

scan 4292; 601.7 m/z; 3.3e+005

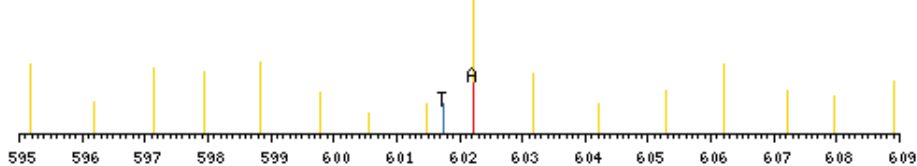

zoomed in precursor plot; T=theoretical m/z, A=acquired m/z

| c <sup>+</sup> | c <sup>2+</sup> | #  | AA | #  | z <sup>+</sup> | z <sup>2+</sup> | z <sup>3+</sup> |
|----------------|-----------------|----|----|----|----------------|-----------------|-----------------|
| 181.0977       | 91.0528         | 1  | Y  | 14 |                |                 |                 |
| 449.3919       | 225.1999        | 2  | K  | 13 | 1624.1021      | 812.5550        | 542.0393        |
| 520.4290       | 260.7184        | 3  | A  | 12 | 1355.8079      | 678.4079        | 452.6078        |
| 591.4661       | 296.2370        | 4  | A  | 11 | 1284.7708      | 642.8893        | 428.9288        |
| 738.5346       | 369.7712        | 5  | F  | 10 | 1213.7337      | 607.3707        | 405.2498        |
| 839.5822       | 420.2950        | 6  | T  | 9  | 1066.6652      | 533.8365        | 356.2270        |
| 968.6248       | 484.8163        | 7  | E  | 8  | 965.6176       | 483.3127        | 322.5444        |
| 1128.7851      | 564.8965        | 8  | C  | 7  | 836.5750       | 418.7914        | 279.5302        |
| 1288.9454      | 644.9766        | 9  | C  | 6  | 676.4147       | 338.7113        | 226.1434        |
| 1417.0040      | 709.0059        | 10 | Q  | 5  | 516.2544       | 258.6311        | 172.7567        |
| 1488.0411      | 744.5245        | 11 | A  | 4  | 388.1958       | 194.6018        | 130.0705        |
| 1559.0782      | 780.0430        | 12 | A  | 3  | 317.1587       | 159.0833        | 106.3914        |
| 1674.1052      | 837.5565        | 13 | D  | 2  | 246.1216       | 123.5647        | 82.7124         |
|                |                 | 14 | K  | 1  | 131.0946       | 66.0512         | 44.3701         |

K(2):+268.29 C(8):+160.16 C(9):+160.16

X-range:

0 - 0

MassTol: Y-zoom:

0.950 1.00

ImageSize:

Sm  Lg

MassType:

AVG  MONO

Axis:

1  2

Label:

I  M  -

Ions:

a  +  2+  3+

b  +  2+  3+

c  +  2+  3+

x  +  2+  3+

y  +  2+  3+

z  +  2+  3+

hide H<sub>2</sub>O/NH<sub>3</sub>

zoom 112-122

zoom 124-133

GO

LKASLQK, MH+ 1105.8743, m/z 369.2963  
10HNE-1HSA-37Trypsin5-LTQ4.3307.3307.3.dta

scan 3307; 2.5e+004

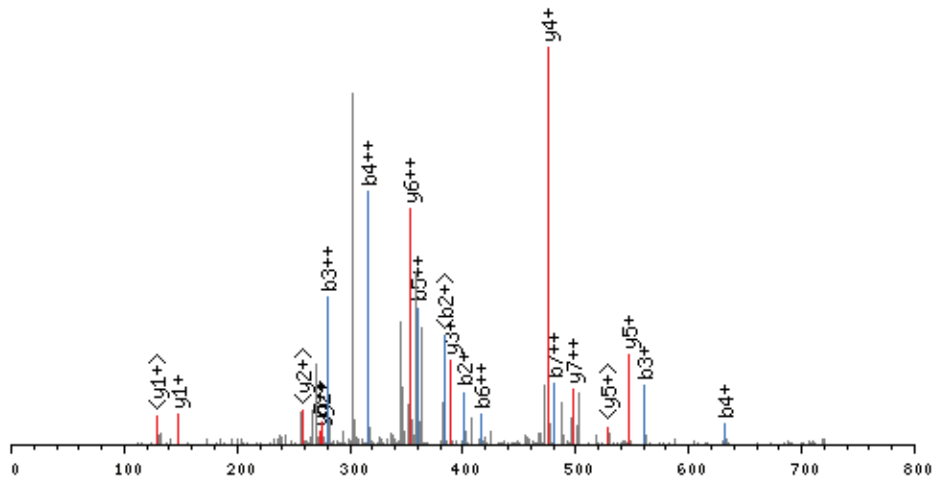

click image to zoom in; click top corners to zoom out [[precursor±](#)]

scan 3305; 369.3 m/z; 8.2e+005

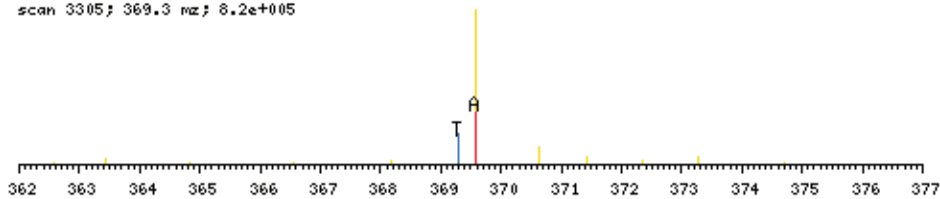

zoomed in precursor plot; T=theoretical m/z, A=acquired m/z

| b <sup>+</sup> | b <sup>2+</sup> | # | AA # | y <sup>+</sup> | y <sup>2+</sup> | y <sup>3+</sup> |
|----------------|-----------------|---|------|----------------|-----------------|-----------------|
| 114.0919       | 57.5499         | 1 | L 8  |                |                 |                 |
| 400.3967       | 200.7022        | 2 | K 7  | 992.7902       | 496.8990        | 331.6020        |
| 560.5570       | 280.7824        | 3 | C 6  | 706.4854       | 353.7466        | 236.1670        |
| 631.5941       | 316.3010        | 4 | A 5  | 546.3251       | 273.6665        | 182.7803        |
| 718.6261       | 359.8170        | 5 | S 4  | 475.2880       | 238.1479        | 159.1012        |
| 831.7102       | 416.3590        | 6 | L 3  | 388.2560       | 194.6319        | 130.0905        |
| 959.7688       | 480.3883        | 7 | Q 2  | 275.1719       | 138.0899        | 92.3959         |
|                |                 | 8 | K 1  | 147.1134       | 74.0606         | 49.7097         |

K(2):+286.30 C(3):+160.16

X-range: 0 -0  
 MassTol: Y-zoom: 0.950 1.00  
 ImageSize:  Sm  Lg  
 MassType:  AVG  MONO  
 Axis:  1  2  
 Label:  I  M  -  
 Ions: a  +  2+  3+  
 b  +  2+  3+  
 c  +  2+  3+  
 x  +  2+  3+  
 y  +  2+  3+  
 z  +  2+  3+  
 hide H<sub>2</sub>O/NH<sub>3</sub>   
 zoom 112-122   
 zoom 124-133   
 GO

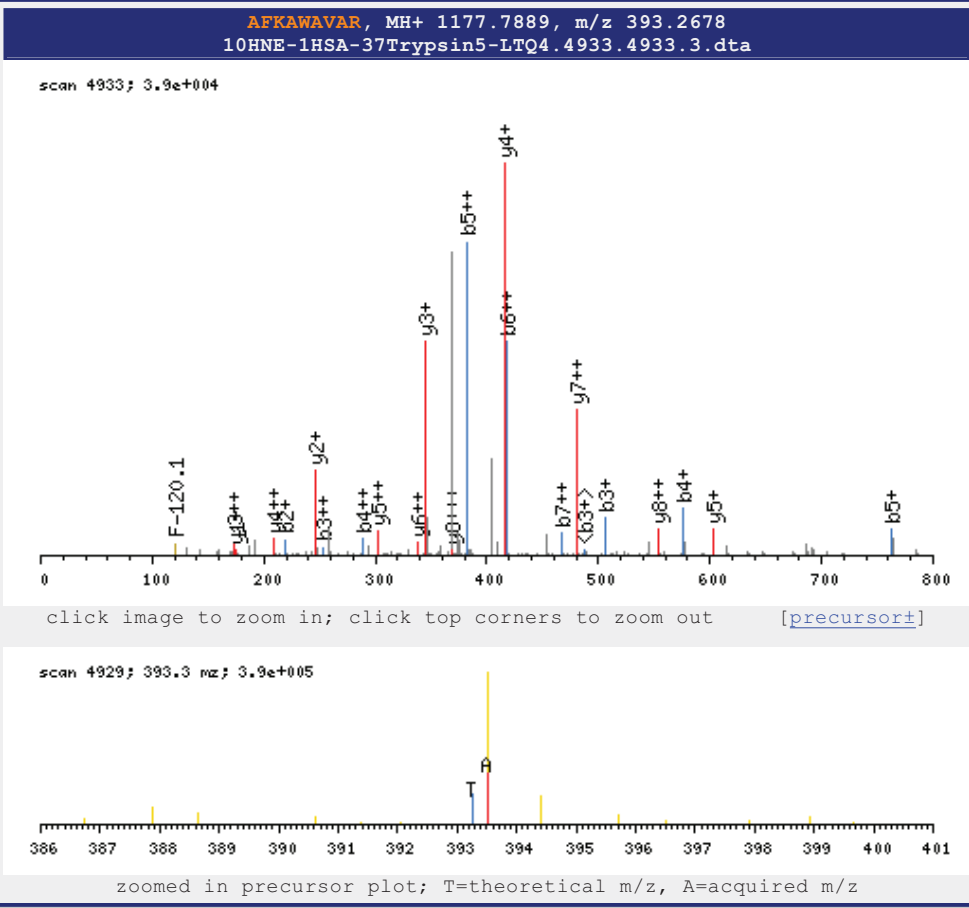

| b <sup>+</sup> | b <sup>2+</sup> | # | AA # | y <sup>+</sup> | y <sup>2+</sup> | y <sup>3+</sup>   |
|----------------|-----------------|---|------|----------------|-----------------|-------------------|
| 72.0449        | 36.5264         | 1 | A    | 9              |                 |                   |
| 219.1134       | 110.0606        | 2 | F    | 8              | 1106.7518       | 553.8798 369.5891 |
| 505.4181       | 253.2130        | 3 | K    | 7              | 959.6833        | 480.3456 320.5663 |
| 576.4552       | 288.7315        | 4 | A    | 6              | 673.3786        | 337.1932 225.1314 |
| 762.5346       | 381.7712        | 5 | W    | 5              | 602.3415        | 301.6746 201.4524 |
| 833.5717       | 417.2897        | 6 | A    | 4              | 416.2621        | 208.6350 139.4259 |
| 932.6401       | 466.8240        | 7 | V    | 3              | 345.2250        | 173.1164 115.7469 |
| 1003.6772      | 502.3425        | 8 | A    | 2              | 246.1566        | 123.5822 82.7241  |
|                |                 | 9 | R    | 1              | 175.1195        | 88.0637 59.0451   |

K(3) : +286.30

X-range:

100 - 1300

MassTol: Y-zoom:

0.950 1.00

ImageSize:

Sm  Lg

MassType:

AVG  MONO

Axis:

1  2

Label:

I  M  -

Ions:

a  +  2+  3+

b  +  2+  3+

c  +  2+  3+

x  +  2+  3+

y  +  2+  3+

z  +  2+  3+

hide H<sub>2</sub>O/NH<sub>3</sub>

zoom 112-122

zoom 124-133

GO

AEFAEVSKLVTDLTK, MH+ 1809.1052, m/z 603.7066  
10HNE-1HSA-37Trypsin5-LTQ1.5822.5822.3.dta

scan 5822; 1.1e+004

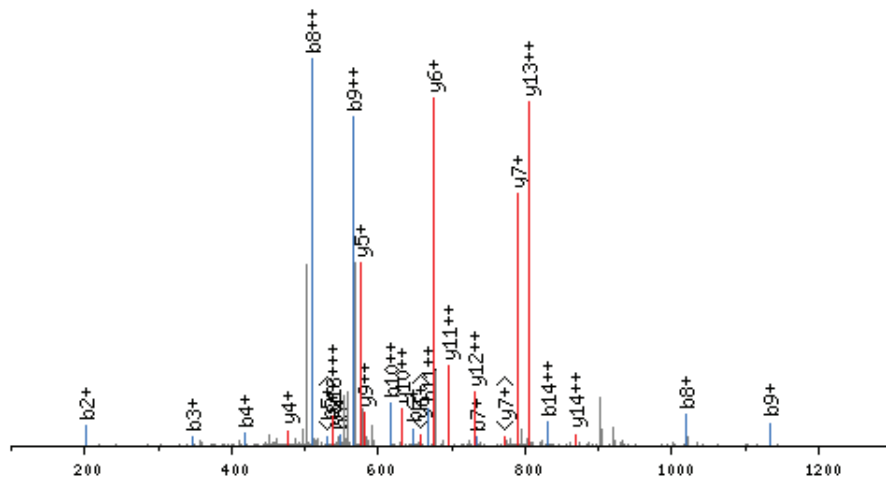

click image to zoom in; click top corners to zoom out [[precursor±](#)]

scan 5818; 603.7 m/z; 1.0e+005

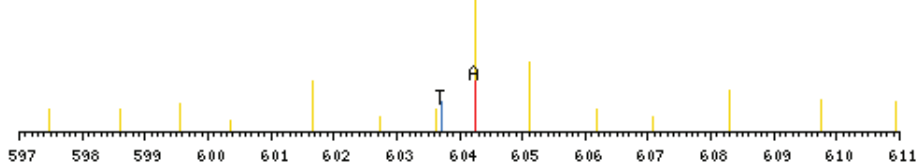

zoomed in precursor plot; T=theoretical m/z, A=acquired m/z

| b <sup>+</sup> | b <sup>2+</sup> | #  | AA | #  | y <sup>+</sup> | y <sup>2+</sup> | y <sup>3+</sup> |
|----------------|-----------------|----|----|----|----------------|-----------------|-----------------|
| 72.0449        | 36.5264         | 1  | A  | 15 |                |                 |                 |
| 201.0875       | 101.0477        | 2  | E  | 14 | 1738.0681      | 869.5380        | 580.0279        |
| 348.1559       | 174.5819        | 3  | F  | 13 | 1609.0255      | 805.0167        | 537.0137        |
| 419.1931       | 210.1004        | 4  | A  | 12 | 1461.9571      | 731.4825        | 487.9909        |
| 548.2357       | 274.6217        | 5  | E  | 11 | 1390.9200      | 695.9639        | 464.3119        |
| 647.3041       | 324.1559        | 6  | V  | 10 | 1261.8774      | 631.4426        | 421.2977        |
| 734.3361       | 367.6720        | 7  | S  | 9  | 1162.8090      | 581.9084        | 388.2749        |
| 1020.6409      | 510.8244        | 8  | K  | 8  | 1075.7770      | 538.3924        | 359.2642        |
| 1133.7249      | 567.3664        | 9  | L  | 7  | 789.4722       | 395.2400        | 263.8293        |
| 1232.7934      | 616.9006        | 10 | V  | 6  | 676.3881       | 338.6980        | 226.1346        |
| 1333.8410      | 667.4244        | 11 | T  | 5  | 577.3197       | 289.1638        | 193.1118        |
| 1448.8680      | 724.9379        | 12 | D  | 4  | 476.2720       | 238.6399        | 159.4292        |
| 1561.9520      | 781.4799        | 13 | L  | 3  | 361.2451       | 181.1265        | 121.0869        |
| 1662.9997      | 832.0038        | 14 | T  | 2  | 248.1610       | 124.5844        | 83.3922         |
|                |                 | 15 | K  | 1  | 147.1134       | 74.0606         | 49.7097         |

K(8) : +286.30

X-range: 800 - 1900  
 MassTol: Y-zoom: 0.950 1.00  
 ImageSize:  Sm  Lg  
 MasType:  AVG  MONO  
 Axis:  1  2  
 Label:  I  M  -  
 Ions: a  +  2+  3+  
 b  +  2+  3+  
 c  +  2+  3+  
 x  +  2+  3+  
 y  +  2+  3+  
 z  +  2+  3+  
 hide H<sub>2</sub>O/NH<sub>3</sub>   
 zoom 112-122   
 zoom 124-133   
 GO

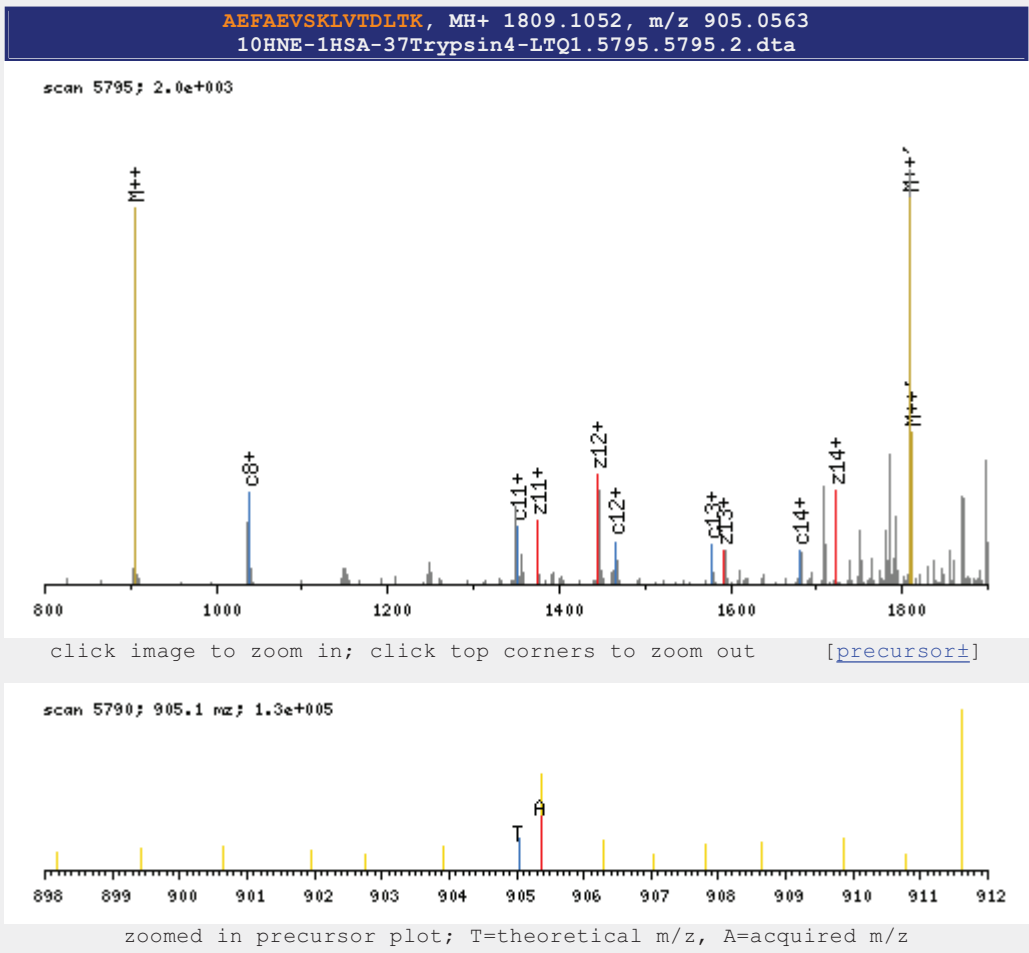

| c <sup>+</sup> | #  | AA | #  | z <sup>+</sup> | z <sup>2+</sup> |
|----------------|----|----|----|----------------|-----------------|
| 89.0715        | 1  | A  | 15 |                |                 |
| 218.1141       | 2  | E  | 14 | 1722.0494      | 861.5286        |
| 365.1825       | 3  | F  | 13 | 1593.0068      | 797.0073        |
| 436.2196       | 4  | A  | 12 | 1445.9384      | 723.4731        |
| 565.2622       | 5  | E  | 11 | 1374.9013      | 687.9546        |
| 664.3306       | 6  | V  | 10 | 1245.8587      | 623.4333        |
| 751.3626       | 7  | S  | 9  | 1146.7903      | 573.8991        |
| 1037.6674      | 8  | K  | 8  | 1059.7583      | 530.3830        |
| 1150.7515      | 9  | L  | 7  | 773.4535       | 387.2306        |
| 1249.8199      | 10 | V  | 6  | 660.3694       | 330.6886        |
| 1350.8676      | 11 | T  | 5  | 561.3010       | 281.1544        |
| 1465.8945      | 12 | D  | 4  | 460.2533       | 230.6306        |
| 1578.9786      | 13 | L  | 3  | 345.2264       | 173.1171        |
| 1680.0263      | 14 | T  | 2  | 232.1423       | 116.5751        |
|                | 15 | K  | 1  | 131.0946       | 66.0512         |

K(8) :+286.30

X-range:

400 - 1800

MassTol: Y-zoom:

0.950 1.00

ImageSize:

Sm  Lg

MassType:

AVG  MONO

Axis:

1  2

Label:

I  M  -

Ions:

a  +  2+  3+

b  +  2+  3+

c  +  2+  3+

x  +  2+  3+

y  +  2+  3+

z  +  2+  3+

hide H<sub>2</sub>O/NH<sub>3</sub>

zoom 112-122

zoom 124-133

GO

LVTDLTKVHTECCHDLECADRR, MH+ 3174.1035, m/z 1058.7060  
10HNE-1HSA-3Trypsin4-LTQ2.4030.4030.3.dta

scan 4030; 1.0e+004

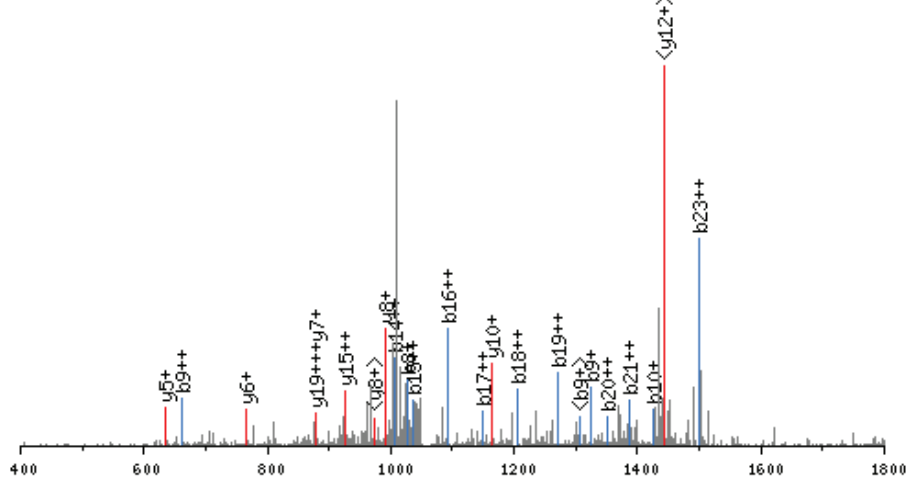

click image to zoom in; click top corners to zoom out [precursor±]

scan 4026; 1058.7 m/z; 2.1e+005

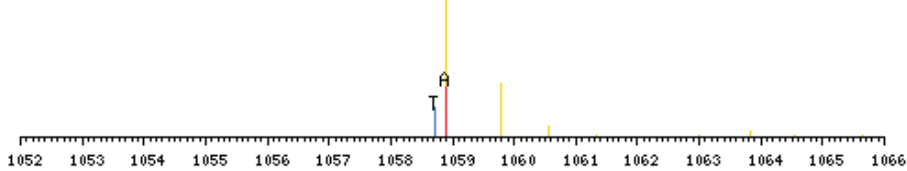

zoomed in precursor plot; T=theoretical m/z, A=acquired m/z

| b <sup>+</sup> | b <sup>2+</sup> | #  | AA | #  | y <sup>+</sup> | y <sup>2+</sup> | y <sup>3+</sup> |
|----------------|-----------------|----|----|----|----------------|-----------------|-----------------|
| 114.0919       | 57.5499         | 1  | L  | 24 |                |                 |                 |
| 213.1603       | 107.0841        | 2  | V  | 23 | 3061.0195      | 1531.0136       | 1021.0117       |
| 314.2080       | 157.6079        | 3  | T  | 22 | 2961.9511      | 1481.4794       | 987.9889        |
| 429.2349       | 215.1214        | 4  | D  | 21 | 2860.9034      | 1430.9556       | 954.3063        |
| 542.3190       | 271.6634        | 5  | L  | 20 | 2745.8764      | 1373.4421       | 915.9640        |
| 643.3667       | 322.1872        | 6  | T  | 19 | 2632.7924      | 1316.9001       | 878.2693        |
| 929.6714       | 465.3396        | 7  | K  | 18 | 2531.7447      | 1266.3763       | 844.5868        |
| 1028.7399      | 514.8738        | 8  | V  | 17 | 2245.4399      | 1123.2239       | 749.1519        |
| 1324.0116      | 662.5097        | 9  | H  | 16 | 2146.3715      | 1073.6897       | 716.1290        |
| 1425.0593      | 713.0336        | 10 | T  | 15 | 1851.0997      | 926.0538        | 617.7051        |
| 1554.1019      | 777.5549        | 11 | E  | 14 | 1750.0520      | 875.5299        | 584.0226        |
| 1714.2622      | 857.6350        | 12 | C  | 13 | 1621.0094      | 811.0086        | 541.0084        |
| 1874.4225      | 937.7152        | 13 | C  | 12 | 1460.8491      | 730.9285        | 487.6216        |
| 2011.4814      | 1006.2446       | 14 | H  | 11 | 1300.6888      | 650.8483        | 434.2348        |
| 2068.5029      | 1034.7554       | 15 | G  | 10 | 1163.6299      | 582.3189        | 388.5485        |
| 2183.5298      | 1092.2688       | 16 | D  | 9  | 1106.6085      | 553.8081        | 369.5414        |
| 2296.6139      | 1148.8109       | 17 | L  | 8  | 991.5815       | 496.2947        | 331.1991        |
| 2409.6980      | 1205.3529       | 18 | L  | 7  | 878.4975       | 439.7526        | 293.5044        |
| 2538.7406      | 1269.8742       | 19 | E  | 6  | 765.4134       | 383.2106        | 255.8097        |
| 2698.9009      | 1349.9543       | 20 | C  | 5  | 636.3708       | 318.6893        | 212.7955        |
| 2769.9380      | 1385.4729       | 21 | A  | 4  | 476.2105       | 238.6092        | 159.4087        |
| 2884.9649      | 1442.9864       | 22 | D  | 3  | 405.1734       | 203.0906        | 135.7297        |
| 2999.9919      | 1500.4998       | 23 | D  | 2  | 290.1464       | 145.5771        | 97.3874         |
|                |                 | 24 | R  | 1  | 175.1195       | 88.0637         | 59.0451         |

K(7):+286.30 H(9):+295.27 C(12):+160.16 C(13):+160.16  
C(20):+160.16

X-range: 400 - 1900  
 MassTol: Y-zoom: 0.950 1.00  
 ImageSize:  Sm  Lg  
 MassType:  AVG  MONO  
 Axis:  1  2  
 Label:  I  M  -  
 Ions: a  +  2+  3+  
 b  +  2+  3+  
 c  +  2+  3+  
 x  +  2+  3+  
 y  +  2+  3+  
 z  +  2+  3+  
 hide H<sub>2</sub>O/NH<sub>3</sub>   
 zoom 112-122   
 zoom 124-133   
 GO

VHTECCHGDLLECADDR, MH+ 2245.4399, m/z 749.1515  
 10HNE-1HSA-37Trypsin2-LTQ2.4160.4160.3.dta

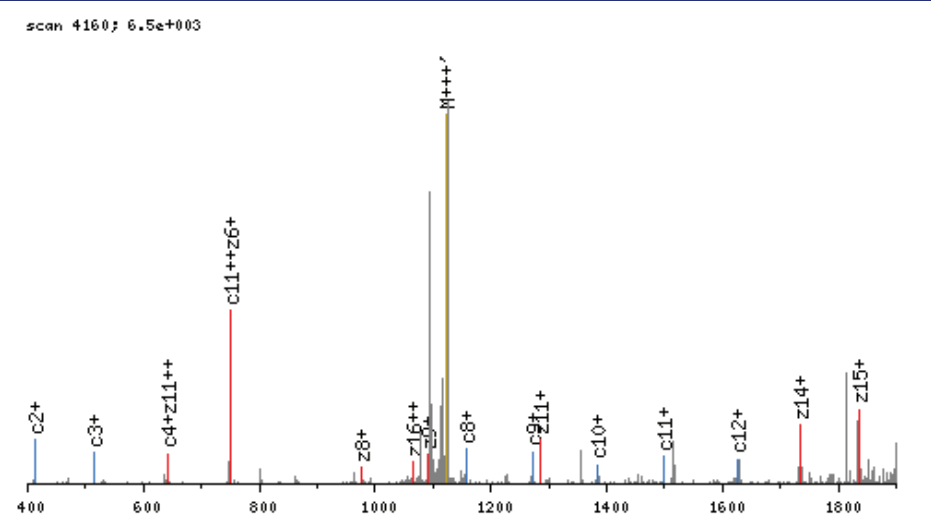

click image to zoom in; click top corners to zoom out [\[precursor±\]](#)

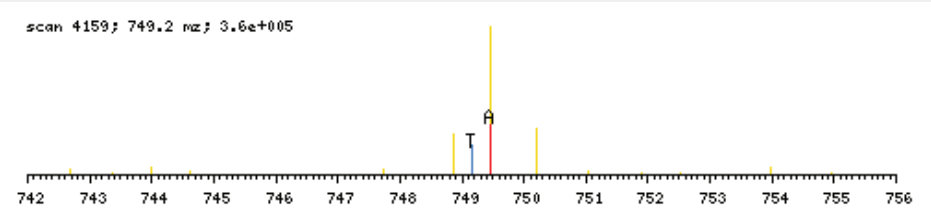

zoomed in precursor plot; T=theoretical m/z, A=acquired m/z

| c <sup>+</sup> | c <sup>2+</sup> | #  | AA | #  | z <sup>+</sup> | z <sup>2+</sup> | z <sup>3+</sup> |
|----------------|-----------------|----|----|----|----------------|-----------------|-----------------|
| 117.1028       | 59.0553         | 1  | V  | 17 |                |                 |                 |
| 412.3746       | 206.6912        | 2  | H  | 16 | 2130.3528      | 1065.6803       | 710.7895        |
| 513.4222       | 257.2150        | 3  | T  | 15 | 1835.0810      | 918.0444        | 612.3655        |
| 642.4648       | 321.7363        | 4  | E  | 14 | 1734.0333      | 867.5206        | 578.6830        |
| 802.6251       | 401.8165        | 5  | C  | 13 | 1604.9907      | 802.9993        | 535.6688        |
| 962.7854       | 481.8966        | 6  | C  | 12 | 1444.8304      | 722.9191        | 482.2820        |
| 1099.8444      | 550.4261        | 7  | H  | 11 | 1284.6701      | 642.8390        | 428.8953        |
| 1156.8658      | 578.9368        | 8  | G  | 10 | 1147.6112      | 574.3095        | 383.2090        |
| 1271.8928      | 636.4503        | 9  | D  | 9  | 1090.5897      | 545.7988        | 364.2018        |
| 1384.9768      | 692.9923        | 10 | L  | 8  | 975.5628       | 488.2853        | 325.8595        |
| 1498.0609      | 749.5344        | 11 | L  | 7  | 862.4787       | 431.7433        | 288.1648        |
| 1627.1035      | 814.0557        | 12 | E  | 6  | 749.3947       | 375.2012        | 250.4701        |
| 1787.2638      | 894.1358        | 13 | C  | 5  | 620.3521       | 310.6800        | 207.4559        |
| 1858.3009      | 929.6544        | 14 | A  | 4  | 460.1918       | 230.5998        | 154.0691        |
| 1973.3278      | 987.1678        | 15 | D  | 3  | 389.1547       | 195.0812        | 130.3901        |
| 2088.3548      | 1044.6813       | 16 | D  | 2  | 274.1277       | 137.5678        | 92.0478         |
|                |                 | 17 | R  | 1  | 159.1008       | 80.0543         | 53.7055         |

H(2):+295.27 C(5):+160.16 C(6):+160.16 C(13):+160.16

X-range: 200 - 1400  
 MassTol: Y-zoom: 0.950 1.00  
 ImageSize:  Sm  Lg  
 MassType:  AVG  MONO  
 Axis:  1  2  
 Label:  I  M  -  
 Ions: a  +  2+  3+  
 b  +  2+  3+  
 c  +  2+  3+  
 x  +  2+  3+  
 y  +  2+  3+  
 z  +  2+  3+  
 hide H<sub>2</sub>O/NH<sub>3</sub>   
 zoom 112-122   
 zoom 124-133   
 GO

VHTECCHGDLLECADDR, MH+ 2403.6528, m/z 801.8891  
 10HNE-1HSA-37Trypsin5-LTQ4.5591.5591.3.dta

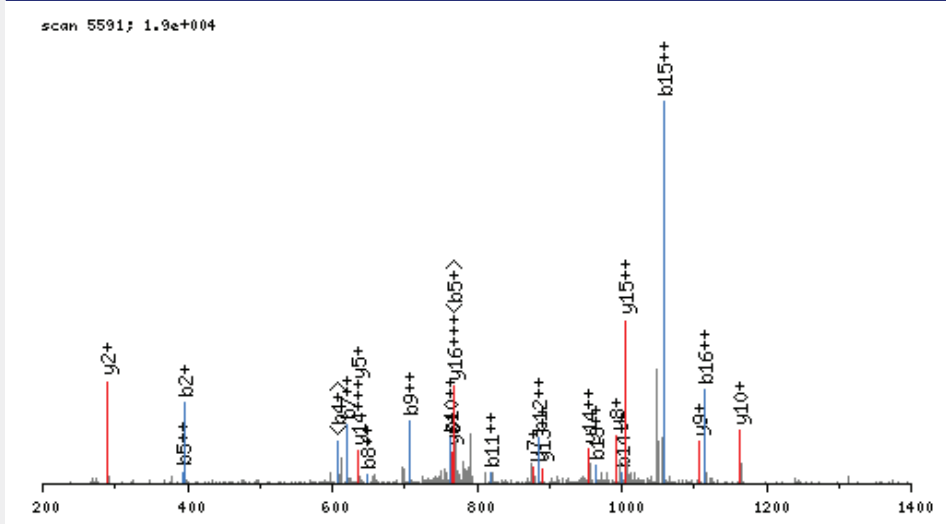

click image to zoom in; click top corners to zoom out [precursor±]

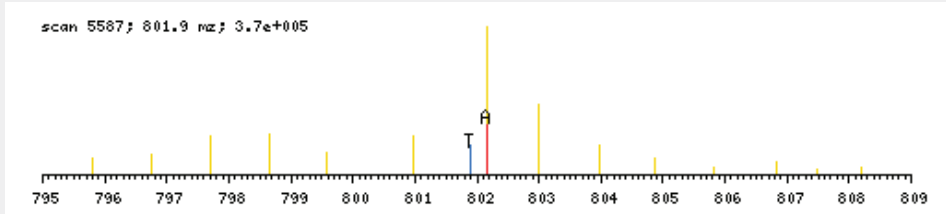

zoomed in precursor plot; T=theoretical m/z, A=acquired m/z

| b <sup>+</sup> | b <sup>2+</sup> | #  | AA | #  | y <sup>+</sup> | y <sup>2+</sup> | y <sup>3+</sup> |
|----------------|-----------------|----|----|----|----------------|-----------------|-----------------|
| 100.0762       | 50.5420         | 1  | V  | 17 |                |                 |                 |
| 395.3480       | 198.1779        | 2  | H  | 16 | 2304.5844      | 1152.7961       | 768.8667        |
| 496.3957       | 248.7018        | 3  | T  | 15 | 2009.3126      | 1005.1602       | 670.4427        |
| 625.4383       | 313.2231        | 4  | E  | 14 | 1908.2649      | 954.6364        | 636.7602        |
| 785.5986       | 393.3032        | 5  | C  | 13 | 1779.2223      | 890.1151        | 593.7460        |
| 945.7589       | 473.3834        | 6  | C  | 12 | 1619.0620      | 810.0349        | 540.3592        |
| 1241.0307      | 621.0192        | 7  | H  | 11 | 1458.9017      | 729.9548        | 486.9725        |
| 1298.0521      | 649.5300        | 8  | G  | 10 | 1163.6299      | 582.3189        | 388.5485        |
| 1413.0791      | 707.0435        | 9  | D  | 9  | 1106.6085      | 553.8081        | 369.5414        |
| 1526.1631      | 763.5855        | 10 | L  | 8  | 991.5815       | 496.2947        | 331.1991        |
| 1639.2472      | 820.1275        | 11 | L  | 7  | 878.4975       | 439.7526        | 293.5044        |
| 1768.2898      | 884.6488        | 12 | E  | 6  | 765.4134       | 383.2106        | 255.8097        |
| 1928.4501      | 964.7290        | 13 | C  | 5  | 636.3708       | 318.6893        | 212.7955        |
| 1999.4872      | 1000.2475       | 14 | A  | 4  | 476.2105       | 238.6092        | 159.4087        |
| 2114.5142      | 1057.7610       | 15 | D  | 3  | 405.1734       | 203.0906        | 135.7297        |
| 2229.5411      | 1115.2745       | 16 | D  | 2  | 290.1464       | 145.5771        | 97.3874         |
|                |                 | 17 | R  | 1  | 175.1195       | 88.0637         | 59.0451         |

H(2):+295.27 C(5):+160.16 C(6):+160.16 H(7):+295.27  
 C(13):+160.16



X-range:

200 - 2000

MassTol: Y-zoom:

0.950 1.00

ImageSize:

Sm  Lg

MassType:

AVG  MONO

Axis:

1  2

Label:

I  M  -

Ions:

a  +  2+  3+

b  +  2+  3+

c  +  2+  3+

x  +  2+  3+

y  +  2+  3+

z  +  2+  3+

hide H<sub>2</sub>O/NH<sub>3</sub>

zoom 112-122

zoom 124-133

GO

VHTECCHGDLLECADDR, MH+ 2403.6528, m/z 801.8891  
10HNE-1HSA-37Trypsin5-LTQ4.5590.5590.3.dta

scan 5590; 1.2e+003

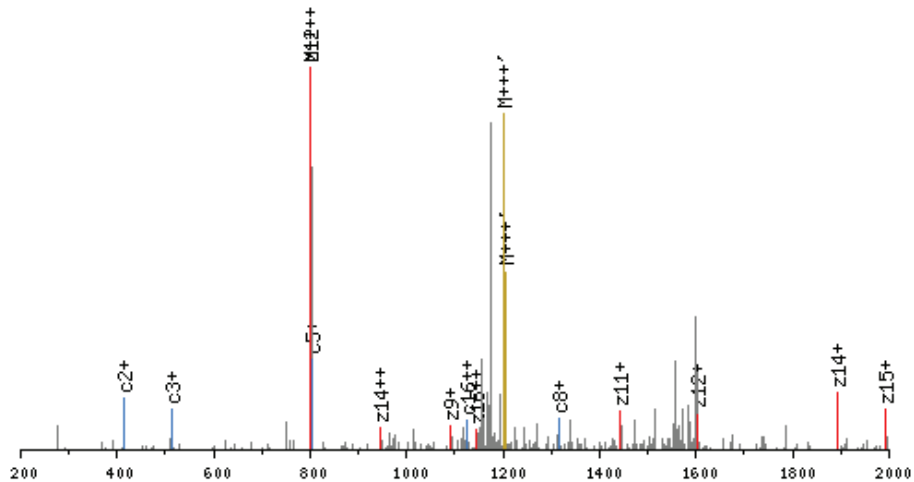

click image to zoom in; click top corners to zoom out [\[precursor±\]](#)

scan 5587; 801.9 m/z; 3.7e+005

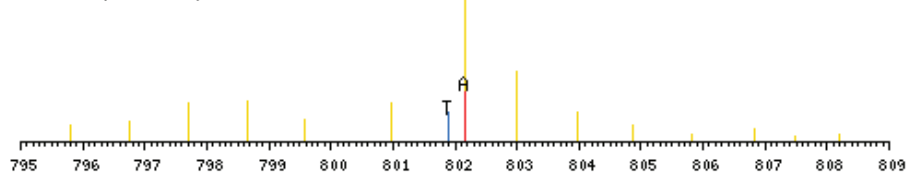

zoomed in precursor plot; T=theoretical m/z, A=acquired m/z

| C <sup>+</sup> | C <sup>2+</sup> | #  | AA | #  | Z <sup>+</sup> | Z <sup>2+</sup> | Z <sup>3+</sup> |
|----------------|-----------------|----|----|----|----------------|-----------------|-----------------|
| 117.1028       | 59.0553         | 1  | V  | 17 |                |                 |                 |
| 412.3746       | 206.6912        | 2  | H  | 16 | 2288.5656      | 1144.7867       | 763.5271        |
| 513.4222       | 257.2150        | 3  | T  | 15 | 1993.2939      | 997.1508        | 665.1032        |
| 642.4648       | 321.7363        | 4  | E  | 14 | 1892.2462      | 946.6270        | 631.4206        |
| 802.6251       | 401.8165        | 5  | C  | 13 | 1763.2036      | 882.1057        | 588.4064        |
| 962.7854       | 481.8966        | 6  | C  | 12 | 1603.0433      | 802.0256        | 535.0196        |
| 1258.0572      | 629.5325        | 7  | H  | 11 | 1442.8830      | 721.9454        | 481.6329        |
| 1315.0787      | 658.0433        | 8  | G  | 10 | 1147.6112      | 574.3095        | 383.2090        |
| 1430.1056      | 715.5567        | 9  | D  | 9  | 1090.5897      | 545.7988        | 364.2018        |
| 1543.1897      | 772.0988        | 10 | L  | 8  | 975.5628       | 488.2853        | 325.8595        |
| 1656.2738      | 828.6408        | 11 | L  | 7  | 862.4787       | 431.7433        | 288.1648        |
| 1785.3163      | 893.1621        | 12 | E  | 6  | 749.3947       | 375.2012        | 250.4701        |
| 1945.4766      | 973.2422        | 13 | C  | 5  | 620.3521       | 310.6800        | 207.4559        |
| 2016.5138      | 1008.7608       | 14 | A  | 4  | 460.1918       | 230.5998        | 154.0691        |
| 2131.5407      | 1066.2743       | 15 | D  | 3  | 389.1547       | 195.0812        | 130.3901        |
| 2246.5676      | 1123.7877       | 16 | D  | 2  | 274.1277       | 137.5678        | 92.0478         |
|                |                 | 17 | R  | 1  | 159.1008       | 80.0543         | 53.7055         |

H(2):+295.27 C(5):+160.16 C(6):+160.16 H(7):+295.27  
C(13):+160.16

X-range: 300 - 1600  
 MassTol: Y-zoom: 0.950 1.00  
 ImageSize:  Sm  Lg  
 MassType:  AVG  MONO  
 Axis:  1  2  
 Label:  I  M  -  
 Ions: a  +  2+  3+  
 b  +  2+  3+  
 c  +  2+  3+  
 x  +  2+  3+  
 y  +  2+  3+  
 z  +  2+  3+  
 hide H<sub>2</sub>O/NH<sub>3</sub>   
 zoom 112-122   
 zoom 124-133   
 GO

VHTECCHGDLLECADRADLAK, MH+ 2901.9330, m/z 967.9825  
 10HNE-1HSA-37Trypsin4-LTQ3.5096.5096.3.dta

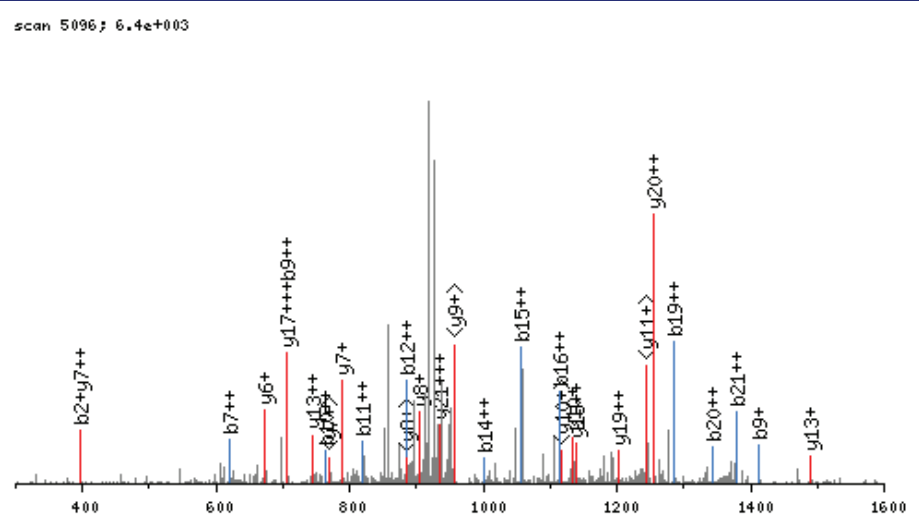

click image to zoom in; click top corners to zoom out [precursor±]

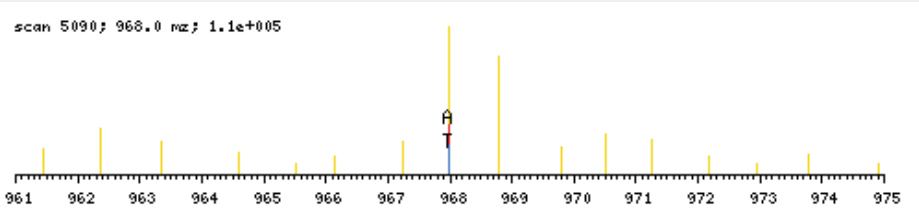

zoomed in precursor plot; T=theoretical m/z, A=acquired m/z

| b <sup>+</sup> | b <sup>2+</sup> | #  | AA | #  | y <sup>+</sup> | y <sup>2+</sup> | y <sup>3+</sup> |
|----------------|-----------------|----|----|----|----------------|-----------------|-----------------|
| 100.0762       | 50.5420         | 1  | V  | 22 |                |                 |                 |
| 395.3480       | 198.1779        | 2  | H  | 21 | 2802.8646      | 1401.9362       | 934.9601        |
| 496.3957       | 248.7018        | 3  | T  | 20 | 2507.5928      | 1254.3003       | 836.5361        |
| 625.4383       | 313.2231        | 4  | E  | 19 | 2406.5451      | 1203.7765       | 802.8536        |
| 785.5986       | 393.3032        | 5  | C  | 18 | 2277.5025      | 1139.2552       | 759.8394        |
| 945.7589       | 473.3834        | 6  | C  | 17 | 2117.3422      | 1059.1750       | 706.4526        |
| 1241.0307      | 621.0192        | 7  | H  | 16 | 1957.1819      | 979.0949        | 653.0659        |
| 1298.0521      | 649.5300        | 8  | G  | 15 | 1661.9101      | 831.4590        | 554.6419        |
| 1413.0791      | 707.0435        | 9  | D  | 14 | 1604.8887      | 802.9482        | 535.6348        |
| 1526.1631      | 763.5855        | 10 | L  | 13 | 1489.8617      | 745.4348        | 497.2925        |
| 1639.2472      | 820.1275        | 11 | L  | 12 | 1376.7777      | 688.8927        | 459.5978        |
| 1768.2898      | 884.6488        | 12 | E  | 11 | 1263.6936      | 632.3507        | 421.9031        |
| 1928.4501      | 964.7290        | 13 | C  | 10 | 1134.6510      | 567.8294        | 378.8889        |
| 1999.4872      | 1000.2475       | 14 | A  | 9  | 974.4907       | 487.7493        | 325.5021        |
| 2114.5142      | 1057.7610       | 15 | D  | 8  | 903.4536       | 452.2307        | 301.8231        |
| 2229.5411      | 1115.2745       | 16 | D  | 7  | 788.4266       | 394.7172        | 263.4808        |
| 2385.6422      | 1193.3250       | 17 | R  | 6  | 673.3997       | 337.2038        | 225.1384        |
| 2456.6793      | 1228.8436       | 18 | A  | 5  | 517.2986       | 259.1532        | 173.1047        |
| 2571.7063      | 1286.3570       | 19 | D  | 4  | 446.2615       | 223.6346        | 149.4257        |
| 2684.7903      | 1342.8991       | 20 | L  | 3  | 331.2345       | 166.1212        | 111.0834        |
| 2755.8274      | 1378.4176       | 21 | A  | 2  | 218.1505       | 109.5791        | 73.3887         |
|                |                 | 22 | K  | 1  | 147.1134       | 74.0606         | 49.7097         |

H(2):+295.27 C(5):+160.16 C(6):+160.16 H(7):+295.27  
 C(13):+160.16

X-range: 200 - 1800  
 MassTol: Y-zoom: 0.950 2.00  
 ImageSize:  Sm  Lg  
 MassType:  AVG  MONO  
 Axis:  1  2  
 Label:  I  M  -  
 Ions: a  +  2+  3+  
 b  +  2+  3+  
 c  +  2+  3+  
 x  +  2+  3+  
 y  +  2+  3+  
 z  +  2+  3+  
 hide H<sub>2</sub>O/NH<sub>3</sub>   
 zoom 112-122   
 zoom 124-133   
 GO

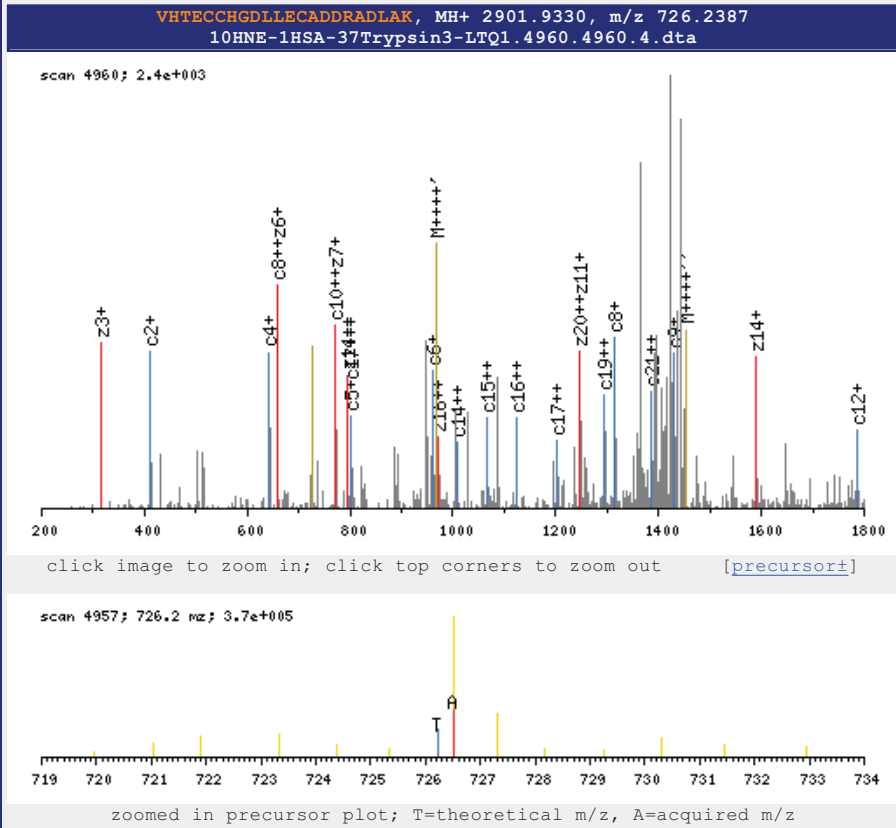

| c <sup>+</sup> | c <sup>2+</sup> | c <sup>3+</sup> | #  | AA | #  | z <sup>+</sup> | z <sup>2+</sup> | z <sup>3+</sup> |
|----------------|-----------------|-----------------|----|----|----|----------------|-----------------|-----------------|
| 117.1028       | 59.0553         | 39.7061         | 1  | V  | 22 |                |                 |                 |
| 412.3746       | 206.6912        | 138.1301        | 2  | H  | 21 | 2786.8458      | 1393.9268       | 929.6205        |
| 513.4222       | 257.2150        | 171.8126        | 3  | T  | 20 | 2491.5741      | 1246.2909       | 831.1966        |
| 642.4648       | 321.7363        | 214.8268        | 4  | E  | 19 | 2390.5264      | 1195.7671       | 797.5140        |
| 802.6251       | 401.8165        | 268.2136        | 5  | C  | 18 | 2261.4838      | 1131.2458       | 754.4998        |
| 962.7854       | 481.8966        | 321.6004        | 6  | C  | 17 | 2101.3235      | 1051.1657       | 701.1130        |
| 1258.0572      | 629.5325        | 420.0243        | 7  | H  | 16 | 1941.1632      | 971.0855        | 647.7263        |
| 1315.0787      | 658.0433        | 439.0314        | 8  | G  | 15 | 1645.8914      | 823.4496        | 549.3024        |
| 1430.1056      | 715.5567        | 477.3738        | 9  | D  | 14 | 1588.8699      | 794.9389        | 530.2952        |
| 1543.1897      | 772.0988        | 515.0684        | 10 | L  | 13 | 1473.8430      | 737.4254        | 491.9529        |
| 1656.2738      | 828.6408        | 552.7631        | 11 | L  | 12 | 1360.7589      | 680.8834        | 454.2582        |
| 1785.3163      | 893.1621        | 595.7773        | 12 | E  | 11 | 1247.6749      | 624.3413        | 416.5635        |
| 1945.4766      | 973.2422        | 649.1641        | 13 | C  | 10 | 1118.6323      | 559.8200        | 373.5493        |
| 2016.5138      | 1008.7608       | 672.8431        | 14 | A  | 9  | 958.4720       | 479.7399        | 320.1625        |
| 2131.5407      | 1066.2743       | 711.1855        | 15 | D  | 8  | 887.4349       | 444.2213        | 296.4835        |
| 2246.5676      | 1123.7877       | 749.5278        | 16 | D  | 7  | 772.4079       | 386.7079        | 258.1412        |
| 2402.6688      | 1201.8383       | 801.5615        | 17 | R  | 6  | 657.3810       | 329.1944        | 219.7989        |
| 2473.7059      | 1237.3568       | 825.2405        | 18 | A  | 5  | 501.2799       | 251.1438        | 167.7652        |
| 2588.7328      | 1294.8703       | 863.5828        | 19 | D  | 4  | 430.2427       | 215.6253        | 144.0861        |
| 2701.8169      | 1351.4124       | 901.2775        | 20 | L  | 3  | 315.2158       | 158.1118        | 105.7438        |
| 2772.8540      | 1386.9309       | 924.9565        | 21 | A  | 2  | 202.1317       | 101.5698        | 68.0491         |
|                |                 |                 | 22 | K  | 1  | 131.0946       | 66.0512         | 44.3701         |

H(2):+295.27 C(5):+160.16 C(6):+160.16 H(7):+295.27 C(13):+160.16

X-range:

200 - 1400

MassTol: Y-zoom:

0.950 1.00

ImageSize:

Sm  Lg

MassType:

AVG  MONO

Axis:

1  2

Label:

I  M  -

Ions:

a  +  2+  3+

b  +  2+  3+

c  +  2+  3+

x  +  2+  3+

y  +  2+  3+

z  +  2+  3+

hide H<sub>2</sub>O/NH<sub>3</sub>

zoom 112-122

zoom 124-133

GO

ADLAKYICENQDSISSK, MH+ 2100.2623, m/z 700.7589  
10HNE-1HSA-37Trypsin5-LTQ3.4681.3.dta

scan 4681; 2.3e+003

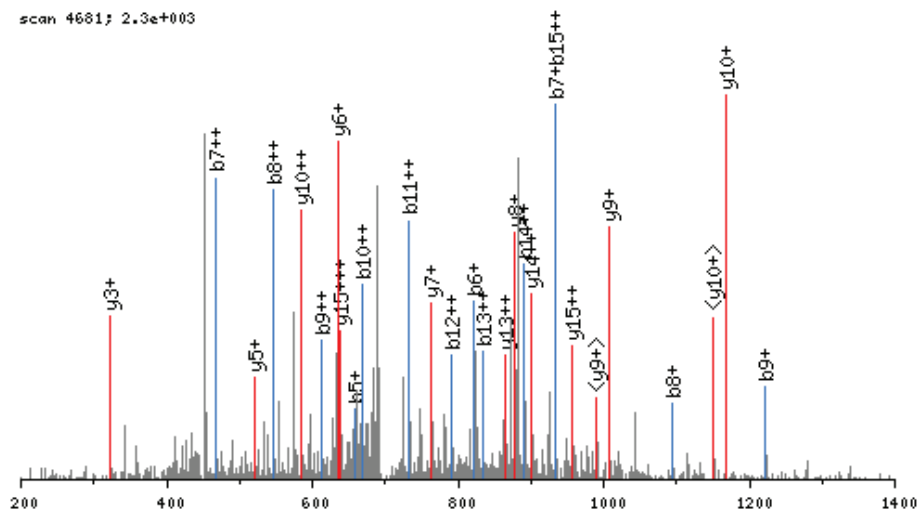

click image to zoom in; click top corners to zoom out [precursor±]

scan 4677; 700.8 m/z; 2.4e+005

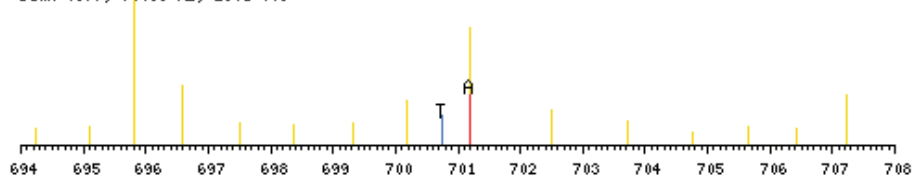

zoomed in precursor plot; T=theoretical m/z, A=acquired m/z

| b <sup>+</sup> | b <sup>2+</sup> | #  | AA | #  | y <sup>+</sup> | y <sup>2+</sup> | y <sup>3+</sup> |
|----------------|-----------------|----|----|----|----------------|-----------------|-----------------|
| 72.0449        | 36.5264         | 1  | A  | 17 |                |                 |                 |
| 187.0719       | 94.0399         | 2  | D  | 16 | 2029.2251      | 1015.1165       | 677.0803        |
| 300.1559       | 150.5819        | 3  | L  | 15 | 1914.1982      | 957.6030        | 638.7379        |
| 371.1931       | 186.1004        | 4  | A  | 14 | 1801.1141      | 901.0610        | 601.0433        |
| 657.4978       | 329.2528        | 5  | K  | 13 | 1730.0770      | 865.5424        | 577.3642        |
| 820.5612       | 410.7845        | 6  | Y  | 12 | 1443.7722      | 722.3900        | 481.9293        |
| 933.6452       | 467.3265        | 7  | I  | 11 | 1280.7089      | 640.8584        | 427.5749        |
| 1093.8055      | 547.4067        | 8  | C  | 10 | 1167.6248      | 584.3163        | 389.8802        |
| 1222.8481      | 611.9280        | 9  | E  | 9  | 1007.4645      | 504.2362        | 336.4934        |
| 1336.8911      | 668.9494        | 10 | N  | 8  | 878.4220       | 439.7149        | 293.4792        |
| 1464.9496      | 732.9787        | 11 | Q  | 7  | 764.3790       | 382.6934        | 255.4649        |
| 1579.9766      | 790.4922        | 12 | D  | 6  | 636.3204       | 318.6641        | 212.7787        |
| 1667.0086      | 834.0082        | 13 | S  | 5  | 521.2935       | 261.1507        | 174.4364        |
| 1780.0927      | 890.5502        | 14 | I  | 4  | 434.2615       | 217.6346        | 145.4257        |
| 1867.1247      | 934.0663        | 15 | S  | 3  | 321.1774       | 161.0926        | 107.7310        |
| 1954.1567      | 977.5823        | 16 | S  | 2  | 234.1454       | 117.5766        | 78.7203         |
|                |                 | 17 | K  | 1  | 147.1134       | 74.0606         | 49.7097         |

K(5):+286.30 C(8):+160.16

X-range:

400 - 1800

MassTol: Y-zoom:

0.950 1.00

ImageSize:

Sm  Lg

MassType:

AVG  MONO

Axis:

1  2

Label:

I  M  -

Ions:

a  +  2+  3+

b  +  2+  3+

c  +  2+  3+

x  +  2+  3+

y  +  2+  3+

z  +  2+  3+

hide H<sub>2</sub>O/NH<sub>3</sub>

zoom 112-122

zoom 124-133

GO

ADLAKYICENQDSISSK, MH+ 2100.2623, m/z 700.7589  
10HNE-1HSA-37Trypsin3-LTQ2.4855.4855.3.dta

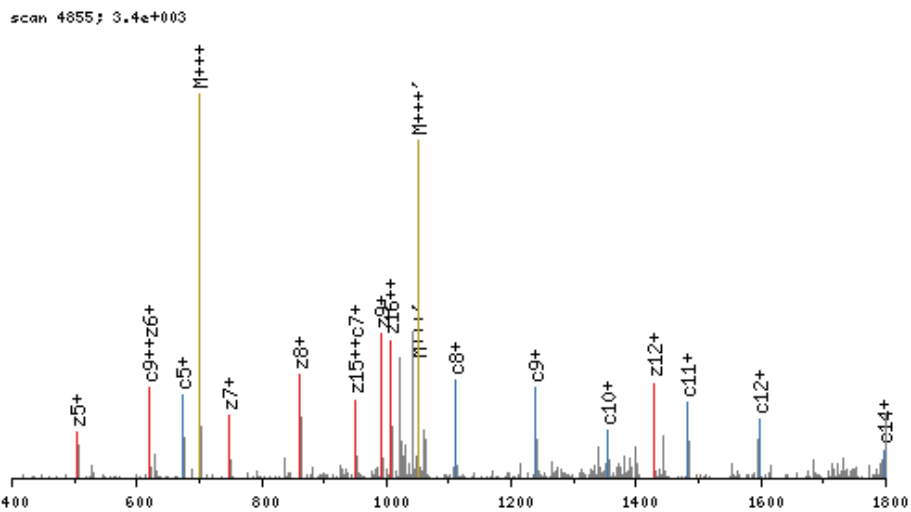

click image to zoom in; click top corners to zoom out [precursor±]

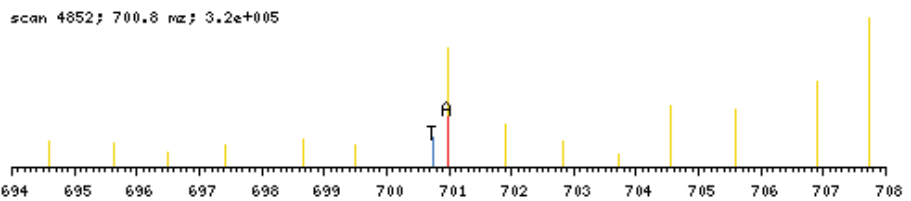

zoomed in precursor plot; T=theoretical m/z, A=acquired m/z

| c <sup>+</sup> | c <sup>2+</sup> | #  | AA | #  | z <sup>+</sup> | z <sup>2+</sup> | z <sup>3+</sup> |
|----------------|-----------------|----|----|----|----------------|-----------------|-----------------|
| 89.0715        | 45.0397         | 1  | A  | 17 |                |                 |                 |
| 204.0984       | 102.5531        | 2  | D  | 16 | 2013.2064      | 1007.1071       | 671.7407        |
| 317.1825       | 159.0952        | 3  | L  | 15 | 1898.1795      | 949.5936        | 633.3984        |
| 388.2196       | 194.6137        | 4  | A  | 14 | 1785.0954      | 893.0516        | 595.7037        |
| 674.5244       | 337.7661        | 5  | K  | 13 | 1714.0583      | 857.5331        | 572.0246        |
| 837.5877       | 419.2978        | 6  | Y  | 12 | 1427.7535      | 714.3807        | 476.5897        |
| 950.6718       | 475.8398        | 7  | I  | 11 | 1264.6902      | 632.8490        | 422.2353        |
| 1110.8321      | 555.9200        | 8  | C  | 10 | 1151.6061      | 576.3070        | 384.5406        |
| 1239.8747      | 620.4412        | 9  | E  | 9  | 991.4458       | 496.2268        | 331.1538        |
| 1353.9176      | 677.4627        | 10 | N  | 8  | 862.4032       | 431.7055        | 288.1396        |
| 1481.9762      | 741.4920        | 11 | Q  | 7  | 748.3603       | 374.6841        | 250.1253        |
| 1597.0031      | 799.0055        | 12 | D  | 6  | 620.3017       | 310.6548        | 207.4391        |
| 1684.0352      | 842.5215        | 13 | S  | 5  | 505.2748       | 253.1413        | 169.0968        |
| 1797.1192      | 899.0635        | 14 | I  | 4  | 418.2427       | 209.6253        | 140.0861        |
| 1884.1512      | 942.5795        | 15 | S  | 3  | 305.1587       | 153.0833        | 102.3914        |
| 1971.1833      | 986.0955        | 16 | S  | 2  | 218.1267       | 109.5672        | 73.3808         |
|                |                 | 17 | K  | 1  | 131.0946       | 66.0512         | 44.3701         |

K(5):+286.30 C(8):+160.16

X-range: 400 - 1800  
 MassTol: Y-zoom: 0.950 1.00  
 ImageSize: Sm Lg  
 MassType: AVG MONO  
 Axis: 1 2  
 Label: I M -  
 Ions: a + 2+ 3+  
 b  +  2+  3+  
 c  +  2+  3+  
 x  +  2+  3+  
 y  +  2+  3+  
 z  +  2+  3+  
 hide H<sub>2</sub>O/NH<sub>3</sub>   
 zoom 112-122   
 zoom 124-133   
 GO

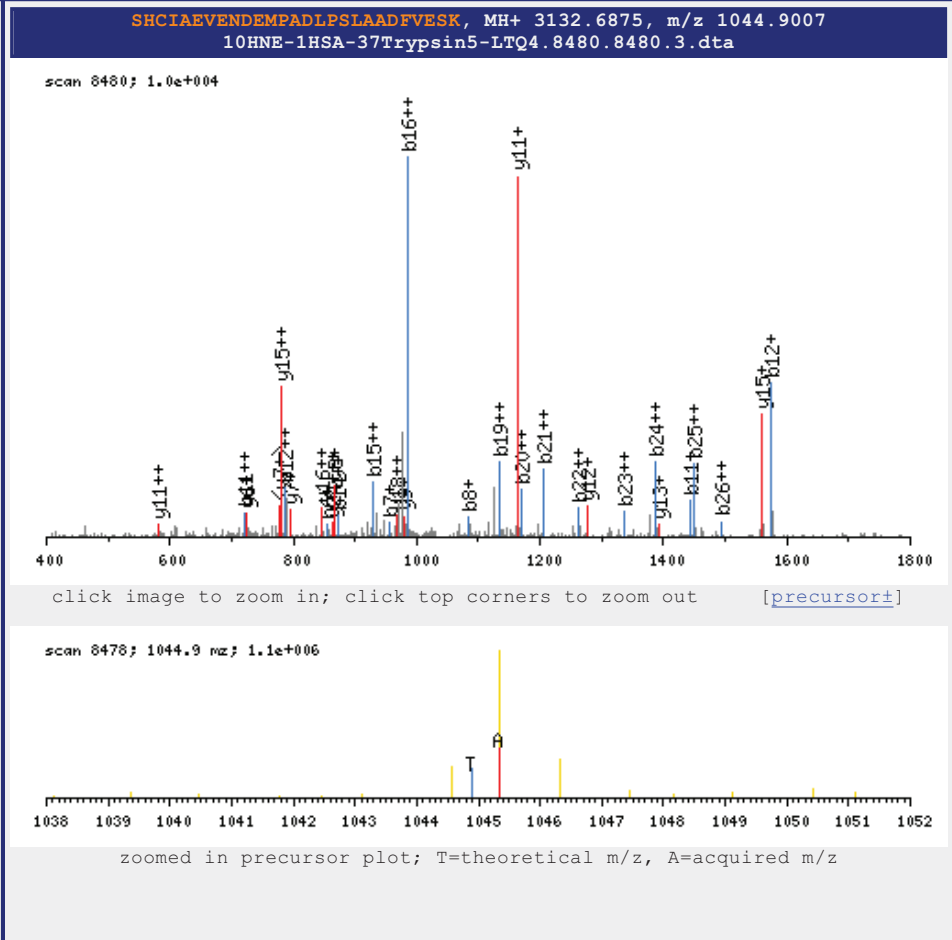

| b <sup>+</sup> | b <sup>2+</sup> | #  | AA | #  | y <sup>+</sup> | y <sup>2+</sup> | y <sup>3+</sup> |
|----------------|-----------------|----|----|----|----------------|-----------------|-----------------|
| 88.0399        | 44.5238         | 1  | S  | 27 |                |                 |                 |
| 383.3116       | 192.1597        | 2  | H  | 26 | 3045.6555      | 1523.3317       | 1015.8904       |
| 543.4719       | 272.2399        | 3  | C  | 25 | 2750.3837      | 1375.6958       | 917.4665        |
| 656.5560       | 328.7819        | 4  | I  | 24 | 2590.2234      | 1295.6156       | 864.0797        |
| 727.5931       | 364.3005        | 5  | A  | 23 | 2477.1394      | 1239.0736       | 826.3850        |
| 856.6357       | 428.8218        | 6  | E  | 22 | 2406.1023      | 1203.5550       | 802.7060        |
| 955.7041       | 478.3560        | 7  | V  | 21 | 2277.0597      | 1139.0337       | 759.6918        |
| 1084.7467      | 542.8773        | 8  | E  | 20 | 2177.9913      | 1089.4995       | 726.6690        |
| 1198.7896      | 599.8987        | 9  | N  | 19 | 2048.9487      | 1024.9782       | 683.6548        |
| 1313.8166      | 657.4122        | 10 | D  | 18 | 1934.9057      | 967.9568        | 645.6405        |
| 1442.8592      | 721.9335        | 11 | E  | 17 | 1819.8788      | 910.4433        | 607.2981        |
| 1573.8997      | 787.4537        | 12 | M  | 16 | 1690.8362      | 845.9220        | 564.2839        |
| 1670.9524      | 835.9801        | 13 | P  | 15 | 1559.7957      | 780.4018        | 520.6038        |
| 1741.9895      | 871.4987        | 14 | A  | 14 | 1462.7430      | 731.8754        | 488.2529        |
| 1857.0165      | 929.0122        | 15 | D  | 13 | 1391.7058      | 696.3568        | 464.5738        |
| 1970.1005      | 985.5542        | 16 | L  | 12 | 1276.6789      | 638.8434        | 426.2315        |
| 2067.1533      | 1034.0806       | 17 | P  | 11 | 1163.5948      | 582.3013        | 388.5368        |
| 2154.1853      | 1077.5966       | 18 | S  | 10 | 1066.5421      | 533.7749        | 356.1859        |
| 2267.2694      | 1134.1386       | 19 | L  | 9  | 979.5100       | 490.2589        | 327.1752        |
| 2338.3065      | 1169.6572       | 20 | A  | 8  | 866.4260       | 433.7169        | 289.4805        |
| 2409.3436      | 1205.1757       | 21 | A  | 7  | 795.3889       | 398.1983        | 265.8015        |
| 2524.3706      | 1262.6892       | 22 | D  | 6  | 724.3517       | 362.6798        | 242.1225        |
| 2671.4390      | 1336.2234       | 23 | F  | 5  | 609.3248       | 305.1663        | 203.7802        |
| 2770.5074      | 1385.7576       | 24 | V  | 4  | 462.2564       | 231.6321        | 154.7573        |
| 2899.5500      | 1450.2789       | 25 | E  | 3  | 363.1880       | 182.0979        | 121.7345        |
| 2986.5820      | 1493.7949       | 26 | S  | 2  | 234.1454       | 117.5766        | 78.7203         |
|                |                 | 27 | K  | 1  | 147.1134       | 74.0606         | 49.7097         |

H (2) :+295.27 C (3) :+160.16

X-range: 500 - 2000  
 MassTol: Y-zoom: 0.950 1.00  
 ImageSize:  Sm  Lg  
 MassType:  AVG  MONO  
 Axis:  1  2  
 Label:  I  M  -  
 Ions: a  +  2+  3+  
 b  +  2+  3+  
 c  +  2+  3+  
 x  +  2+  3+  
 y  +  2+  3+  
 z  +  2+  3+  
 hide H<sub>2</sub>O/NH<sub>3</sub>   
 zoom 112-122   
 zoom 124-133   
 GO

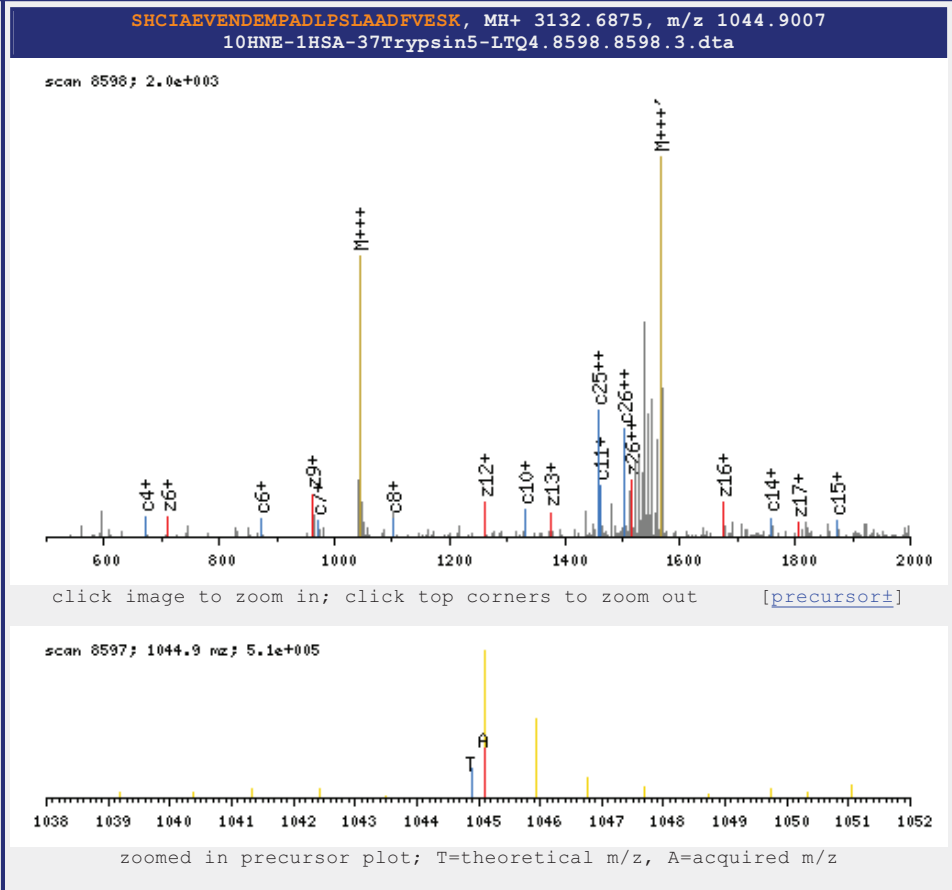

| c <sup>+</sup> | c <sup>2+</sup> | #  | AA | #  | z <sup>+</sup> | z <sup>2+</sup> | z <sup>3+</sup> |
|----------------|-----------------|----|----|----|----------------|-----------------|-----------------|
| 105.0664       | 53.0371         | 1  | S  | 27 |                |                 |                 |
| 400.3382       | 200.6730        | 2  | H  | 26 | 3029.6368      | 1515.3223       | 1010.5508       |
| 560.4985       | 280.7532        | 3  | C  | 25 | 2734.3650      | 1367.6864       | 912.1269        |
| 673.5825       | 337.2952        | 4  | I  | 24 | 2574.2047      | 1287.6063       | 858.7401        |
| 744.6197       | 372.8137        | 5  | A  | 23 | 2461.1207      | 1231.0642       | 821.0454        |
| 873.6623       | 437.3350        | 6  | E  | 22 | 2390.0835      | 1195.5457       | 797.3664        |
| 972.7307       | 486.8692        | 7  | V  | 21 | 2261.0409      | 1131.0244       | 754.3522        |
| 1101.7733      | 551.3905        | 8  | E  | 20 | 2161.9725      | 1081.4902       | 721.3294        |
| 1215.8162      | 608.4120        | 9  | N  | 19 | 2032.9299      | 1016.9689       | 678.3152        |
| 1330.8431      | 665.9255        | 10 | D  | 18 | 1918.8870      | 959.9474        | 640.3009        |
| 1459.8857      | 730.4468        | 11 | E  | 17 | 1803.8601      | 902.4339        | 601.9586        |
| 1590.9262      | 795.9670        | 12 | M  | 16 | 1674.8175      | 837.9126        | 558.9444        |
| 1687.9790      | 844.4934        | 13 | P  | 15 | 1543.7770      | 772.3924        | 515.2642        |
| 1759.0161      | 880.0120        | 14 | A  | 14 | 1446.7242      | 723.8660        | 482.9133        |
| 1874.0430      | 937.5254        | 15 | D  | 13 | 1375.6871      | 688.3475        | 459.2343        |
| 1987.1271      | 994.0675        | 16 | L  | 12 | 1260.6602      | 630.8340        | 420.8919        |
| 2084.1799      | 1042.5938       | 17 | P  | 11 | 1147.5761      | 574.2920        | 383.1973        |
| 2171.2119      | 1086.1099       | 18 | S  | 10 | 1050.5233      | 525.7656        | 350.8463        |
| 2284.2960      | 1142.6519       | 19 | L  | 9  | 963.4913       | 482.2496        | 321.8357        |
| 2355.3331      | 1178.1704       | 20 | A  | 8  | 850.4072       | 425.7075        | 284.1410        |
| 2426.3702      | 1213.6890       | 21 | A  | 7  | 779.3701       | 390.1890        | 260.4619        |
| 2541.3971      | 1271.2025       | 22 | D  | 6  | 708.3330       | 354.6704        | 236.7829        |
| 2688.4655      | 1344.7367       | 23 | F  | 5  | 593.3061       | 297.1570        | 198.4406        |
| 2787.5339      | 1394.2709       | 24 | V  | 4  | 446.2377       | 223.6227        | 149.4178        |
| 2916.5765      | 1458.7922       | 25 | E  | 3  | 347.1693       | 174.0885        | 116.3950        |
| 3003.6086      | 1502.3082       | 26 | S  | 2  | 218.1267       | 109.5672        | 73.3808         |
|                |                 | 27 | K  | 1  | 131.0946       | 66.0512         | 44.3701         |

H(2):+295.27 C(3):+160.16

X-range: 400 - 1800  
 MassTol: Y-zoom: 0.950 1.00  
 ImageSize:  Sm  Lg  
 MassType:  AVG  MONO  
 Axis:  1  2  
 Label:  I  M  -  
 Ions: a  +  2+  3+  
 b  +  2+  3+  
 c  +  2+  3+  
 x  +  2+  3+  
 y  +  2+  3+  
 z  +  2+  3+  
 hide H<sub>2</sub>O/NH<sub>3</sub>   
 zoom 112-122   
 zoom 124-133   
 GO

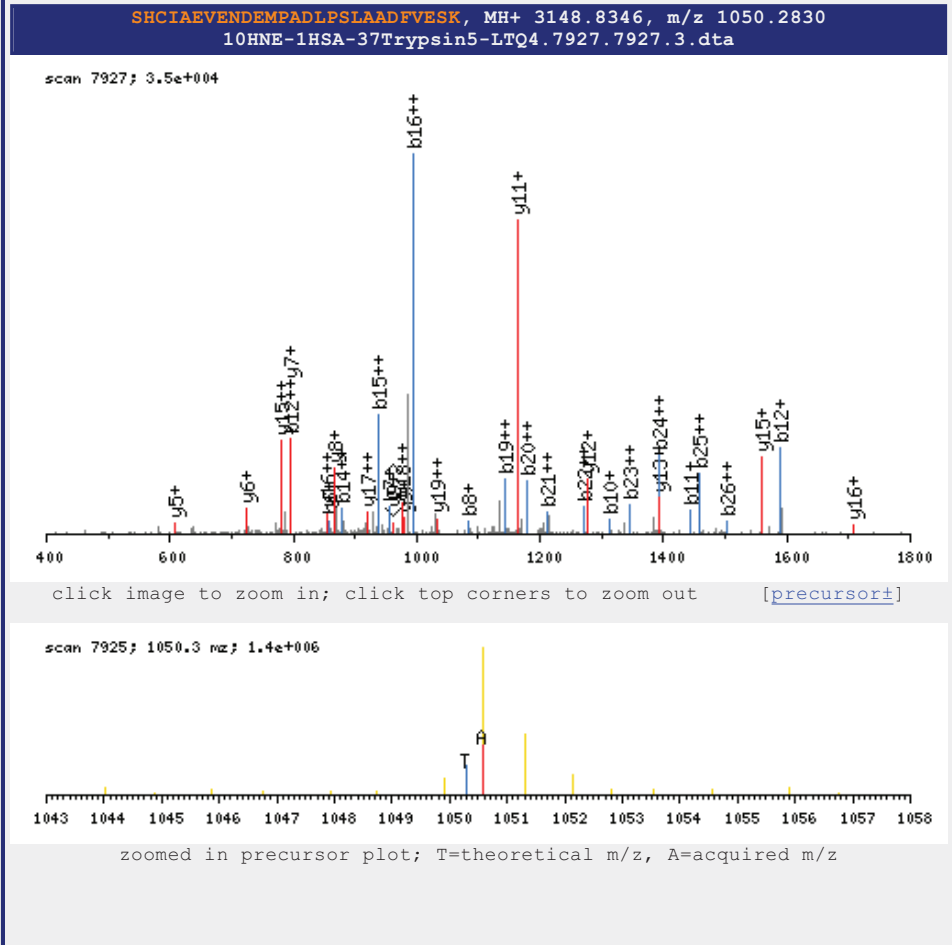

| b <sup>+</sup> | b <sup>2+</sup> | #  | AA | #  | y <sup>+</sup> | y <sup>2+</sup> | y <sup>3+</sup> |
|----------------|-----------------|----|----|----|----------------|-----------------|-----------------|
| 88.0399        | 44.5238         | 1  | S  | 27 |                |                 |                 |
| 383.3116       | 192.1597        | 2  | H  | 26 | 3061.8026      | 1531.4052       | 1021.2727       |
| 543.4719       | 272.2399        | 3  | C  | 25 | 2766.5308      | 1383.7693       | 922.8488        |
| 656.5560       | 328.7819        | 4  | I  | 24 | 2606.3705      | 1303.6891       | 869.4620        |
| 727.5931       | 364.3005        | 5  | A  | 23 | 2493.2864      | 1247.1471       | 831.7674        |
| 856.6357       | 428.8218        | 6  | E  | 22 | 2422.2493      | 1211.6286       | 808.0883        |
| 955.7041       | 478.3560        | 7  | V  | 21 | 2293.2067      | 1147.1073       | 765.0741        |
| 1084.7467      | 542.8773        | 8  | E  | 20 | 2194.1383      | 1097.5731       | 732.0513        |
| 1198.7896      | 599.8987        | 9  | N  | 19 | 2065.0957      | 1033.0518       | 689.0371        |
| 1313.8166      | 657.4122        | 10 | D  | 18 | 1951.0528      | 976.0303        | 651.0228        |
| 1442.8592      | 721.9335        | 11 | E  | 17 | 1836.0258      | 918.5168        | 612.6805        |
| 1590.0467      | 795.5273        | 12 | M  | 16 | 1706.9832      | 853.9955        | 569.6663        |
| 1687.0995      | 844.0536        | 13 | P  | 15 | 1559.7957      | 780.4018        | 520.6038        |
| 1758.1366      | 879.5722        | 14 | A  | 14 | 1462.7430      | 731.8754        | 488.2529        |
| 1873.1635      | 937.0857        | 15 | D  | 13 | 1391.7058      | 696.3568        | 464.5738        |
| 1986.2476      | 993.6277        | 16 | L  | 12 | 1276.6789      | 638.8434        | 426.2315        |
| 2083.3003      | 1042.1541       | 17 | P  | 11 | 1163.5948      | 582.3013        | 388.5368        |
| 2170.3324      | 1085.6701       | 18 | S  | 10 | 1066.5421      | 533.7749        | 356.1859        |
| 2283.4164      | 1142.2121       | 19 | L  | 9  | 979.5100       | 490.2589        | 327.1752        |
| 2354.4535      | 1177.7307       | 20 | A  | 8  | 866.4260       | 433.7169        | 289.4805        |
| 2425.4907      | 1213.2492       | 21 | A  | 7  | 795.3889       | 398.1983        | 265.8015        |
| 2540.5176      | 1270.7627       | 22 | D  | 6  | 724.3517       | 362.6798        | 242.1225        |
| 2687.5860      | 1344.2969       | 23 | F  | 5  | 609.3248       | 305.1663        | 203.7802        |
| 2786.6544      | 1393.8311       | 24 | V  | 4  | 462.2564       | 231.6321        | 154.7573        |
| 2915.6970      | 1458.3524       | 25 | E  | 3  | 363.1880       | 182.0979        | 121.7345        |
| 3002.7291      | 1501.8684       | 26 | S  | 2  | 234.1454       | 117.5766        | 78.7203         |
|                |                 | 27 | K  | 1  | 147.1134       | 74.0606         | 49.7097         |

H (2) :+295.27 C (3) :+160.16 M (12) :+147.19



X-range: 400 - 2000  
 MassTol: Y-zoom: 0.950 1.00  
 ImageSize:  Sm  Lg  
 MassType:  AVG  MONO  
 Axis:  1  2  
 Label:  I  M  -  
 Ions: a  +  2+  3+  
 b  +  2+  3+  
 c  +  2+  3+  
 x  +  2+  3+  
 y  +  2+  3+  
 z  +  2+  3+  
 hide H<sub>2</sub>O/NH<sub>3</sub>   
 zoom 112-122   
 zoom 124-133   
 GO

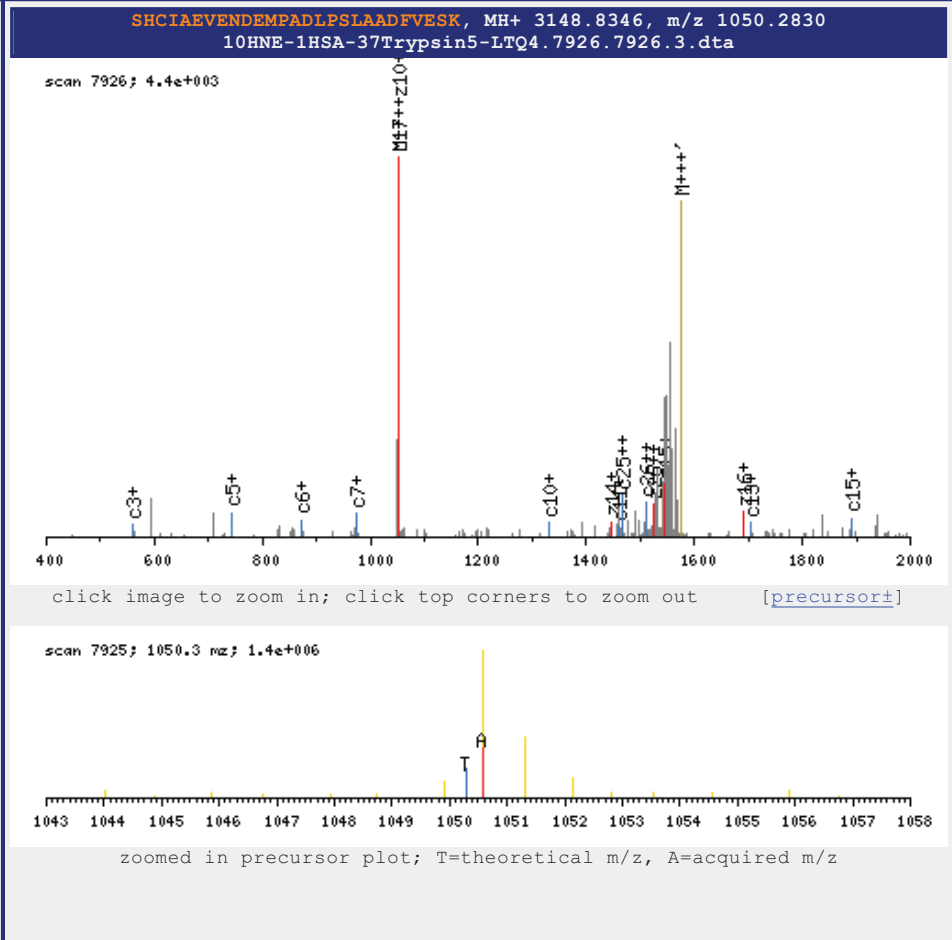

| c <sup>+</sup> | c <sup>2+</sup> | #  | AA | #  | z <sup>+</sup> | z <sup>2+</sup> | z <sup>3+</sup> |
|----------------|-----------------|----|----|----|----------------|-----------------|-----------------|
| 105.0664       | 53.0371         | 1  | S  | 27 |                |                 |                 |
| 400.3382       | 200.6730        | 2  | H  | 26 | 3045.7838      | 1523.3958       | 1015.9332       |
| 560.4985       | 280.7532        | 3  | C  | 25 | 2750.5120      | 1375.7599       | 917.5092        |
| 673.5825       | 337.2952        | 4  | I  | 24 | 2590.3517      | 1295.6798       | 864.1225        |
| 744.6197       | 372.8137        | 5  | A  | 23 | 2477.2677      | 1239.1378       | 826.4278        |
| 873.6623       | 437.3350        | 6  | E  | 22 | 2406.2306      | 1203.6192       | 802.7487        |
| 972.7307       | 486.8692        | 7  | V  | 21 | 2277.1880      | 1139.0979       | 759.7345        |
| 1101.7733      | 551.3905        | 8  | E  | 20 | 2178.1196      | 1089.5637       | 726.7117        |
| 1215.8162      | 608.4120        | 9  | N  | 19 | 2049.0770      | 1025.0424       | 683.6975        |
| 1330.8431      | 665.9255        | 10 | D  | 18 | 1935.0340      | 968.0209        | 645.6832        |
| 1459.8857      | 730.4468        | 11 | E  | 17 | 1820.0071      | 910.5075        | 607.3409        |
| 1607.0732      | 804.0405        | 12 | M  | 16 | 1690.9645      | 845.9862        | 564.3267        |
| 1704.1260      | 852.5669        | 13 | P  | 15 | 1543.7770      | 772.3924        | 515.2642        |
| 1775.1631      | 888.0855        | 14 | A  | 14 | 1446.7242      | 723.8660        | 482.9133        |
| 1890.1901      | 945.5989        | 15 | D  | 13 | 1375.6871      | 688.3475        | 459.2343        |
| 2003.2741      | 1002.1410       | 16 | L  | 12 | 1260.6602      | 630.8340        | 420.8919        |
| 2100.3269      | 1050.6674       | 17 | P  | 11 | 1147.5761      | 574.2920        | 383.1973        |
| 2187.3589      | 1094.1834       | 18 | S  | 10 | 1050.5233      | 525.7656        | 350.8463        |
| 2300.4430      | 1150.7254       | 19 | L  | 9  | 963.4913       | 482.2496        | 321.8357        |
| 2371.4801      | 1186.2440       | 20 | A  | 8  | 850.4072       | 425.7075        | 284.1410        |
| 2442.5172      | 1221.7625       | 21 | A  | 7  | 779.3701       | 390.1890        | 260.4619        |
| 2557.5442      | 1279.2760       | 22 | D  | 6  | 708.3330       | 354.6704        | 236.7829        |
| 2704.6126      | 1352.8102       | 23 | F  | 5  | 593.3061       | 297.1570        | 198.4406        |
| 2803.6810      | 1402.3444       | 24 | V  | 4  | 446.2377       | 223.6227        | 149.4178        |
| 2932.7236      | 1466.8657       | 25 | E  | 3  | 347.1693       | 174.0885        | 116.3950        |
| 3019.7556      | 1510.3817       | 26 | S  | 2  | 218.1267       | 109.5672        | 73.3808         |
|                |                 | 27 | K  | 1  | 131.0946       | 66.0512         | 44.3701         |

H (2) :+295.27 C (3) :+160.16 M (12) :+147.19

X-range:

0 - 0

MassTol: Y-zoom:

0.950 1.00

ImageSize:

Sm  Lg

MassType:

AVG  MONO

Axis:

1  2

Label:

I  M  -

Ions:

a  +  2+  3+

b  +  2+  3+

c  +  2+  3+

x  +  2+  3+

y  +  2+  3+

z  +  2+  3+

hide H<sub>2</sub>O/NH<sub>3</sub>

zoom 112-122

zoom 124-133

GO

RHPDYSVLLLR, MH+ 1626.0565, m/z 542.6903  
10HNE-1HSA-37Trypsin5-LTQ3.4975.4975.3.dta

scan 4975; 1.8e+005

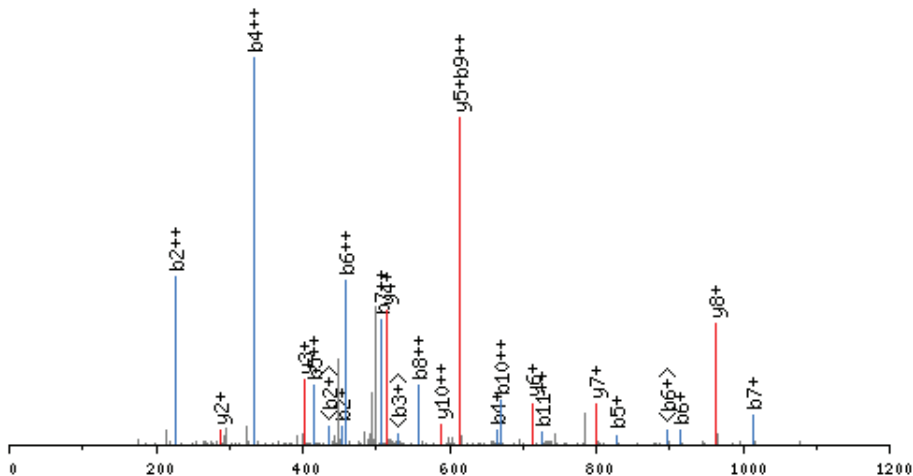

click image to zoom in; click top corners to zoom out [precursor±]

scan 4971; 542.7 m/z; 1.0e+006

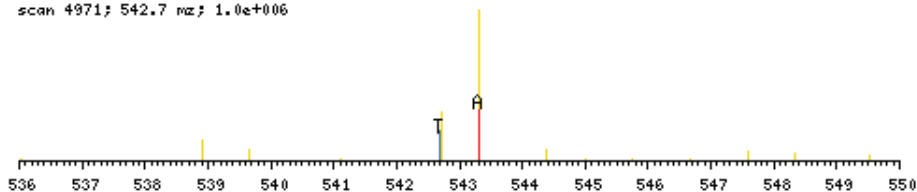

zoomed in precursor plot; T=theoretical m/z, A=acquired m/z

| b <sup>+</sup> | b <sup>2+</sup> | #  | AA | #  | y <sup>+</sup> | y <sup>2+</sup> | y <sup>3+</sup> |
|----------------|-----------------|----|----|----|----------------|-----------------|-----------------|
| 157.1089       | 79.0584         | 1  | R  | 12 |                |                 |                 |
| 452.3807       | 226.6943        | 2  | H  | 11 | 1469.9554      | 735.4816        | 490.6570        |
| 549.4335       | 275.2207        | 3  | P  | 10 | 1174.6836      | 587.8457        | 392.2331        |
| 664.4604       | 332.7341        | 4  | D  | 9  | 1077.6308      | 539.3193        | 359.8822        |
| 827.5238       | 414.2658        | 5  | Y  | 8  | 962.6039       | 481.8059        | 321.5398        |
| 914.5558       | 457.7818        | 6  | S  | 7  | 799.5405       | 400.2742        | 267.1854        |
| 1013.6242      | 507.3160        | 7  | V  | 6  | 712.5085       | 356.7582        | 238.1747        |
| 1112.6926      | 556.8502        | 8  | V  | 5  | 613.4401       | 307.2240        | 205.1519        |
| 1225.7767      | 613.3922        | 9  | L  | 4  | 514.3717       | 257.6898        | 172.1291        |
| 1338.8607      | 669.9343        | 10 | L  | 3  | 401.2876       | 201.1477        | 134.4344        |
| 1451.9448      | 726.4763        | 11 | L  | 2  | 288.2036       | 144.6057        | 96.7397         |
|                |                 | 12 | R  | 1  | 175.1195       | 88.0637         | 59.0451         |

H(2) : +295.27

X-range:

300 - 1700

MassTol: Y-zoom:

0.950 1.00

ImageSize:

Sm  Lg

MassType:

AVG  MONO

Axis:

1  2

Label:

I  M  -

Ions:

a  +  2+  3+

b  +  2+  3+

c  +  2+  3+

x  +  2+  3+

y  +  2+  3+

z  +  2+  3+

hide H<sub>2</sub>O/NH<sub>3</sub>

zoom 112-122

zoom 124-133

GO

RHPDYSVLLLR, MH+ 1626.0565, m/z 542.6903  
10HNE-1HSA-37Trypsin3-LTQ3.5329.5329.3.dta

scan 5329; 1.3e+005

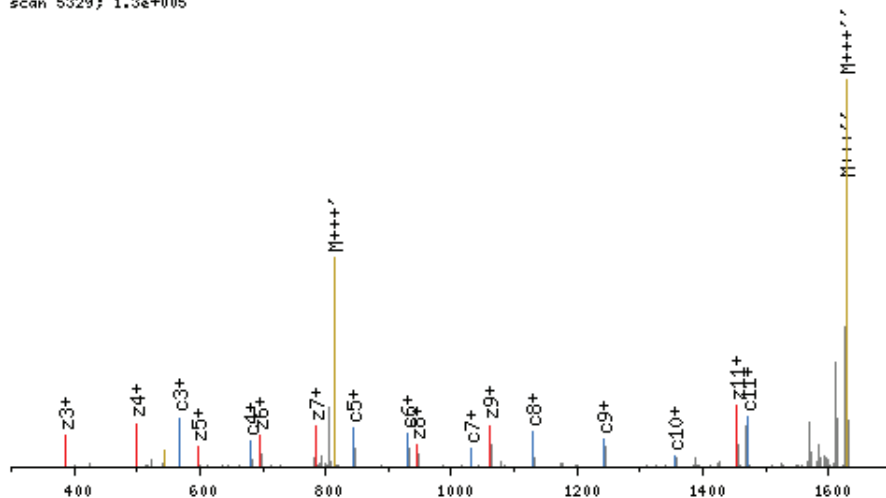

click image to zoom in; click top corners to zoom out [precursor±]

scan 5328; 542.7 m/z; 3.2e+006

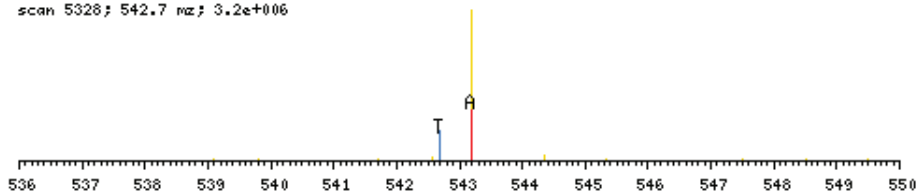

zoomed in precursor plot; T=theoretical m/z, A=acquired m/z

| c <sup>+</sup> | c <sup>2+</sup> | #  | AA | #  | z <sup>+</sup> | z <sup>2+</sup> | z <sup>3+</sup> |
|----------------|-----------------|----|----|----|----------------|-----------------|-----------------|
| 174.1355       | 87.5717         | 1  | R  | 12 |                |                 |                 |
| 469.4073       | 235.2075        | 2  | H  | 11 | 1453.9366      | 727.4722        | 485.3174        |
| 566.4600       | 283.7339        | 3  | P  | 10 | 1158.6649      | 579.8363        | 386.8935        |
| 681.4870       | 341.2474        | 4  | D  | 9  | 1061.6121      | 531.3100        | 354.5426        |
| 844.5503       | 422.7791        | 5  | Y  | 8  | 946.5852       | 473.7965        | 316.2003        |
| 931.5823       | 466.2951        | 6  | S  | 7  | 783.5218       | 392.2648        | 261.8458        |
| 1030.6507      | 515.8293        | 7  | V  | 6  | 696.4898       | 348.7488        | 232.8351        |
| 1129.7192      | 565.3635        | 8  | V  | 5  | 597.4214       | 299.2146        | 199.8123        |
| 1242.8032      | 621.9055        | 9  | L  | 4  | 498.3530       | 249.6804        | 166.7895        |
| 1355.8873      | 678.4476        | 10 | L  | 3  | 385.2689       | 193.1384        | 129.0949        |
| 1468.9713      | 734.9896        | 11 | L  | 2  | 272.1848       | 136.5963        | 91.4002         |
|                |                 | 12 | R  | 1  | 159.1008       | 80.0543         | 53.7055         |

H (2) : +295.27

X-range:

200 - 1000

MassTol: Y-zoom:

0.950 1.00

ImageSize:

Sm  Lg

MassType:

AVG  MONO

Axis:

1  2

Label:

I  M  -

Ions:

a  +  2+  3+

b  +  2+  3+

c  +  2+  3+

x  +  2+  3+

y  +  2+  3+

z  +  2+  3+

hide H<sub>2</sub>O/NH<sub>3</sub>

zoom 112-122

zoom 124-133

GO

HPDYSVLLLR, MH+ 1469.9554, m/z 490.6566  
10HNE-1HSA-37Trypsin4-LTQ1.5285.5285.3.dta

scan 5285; 5.8e+003

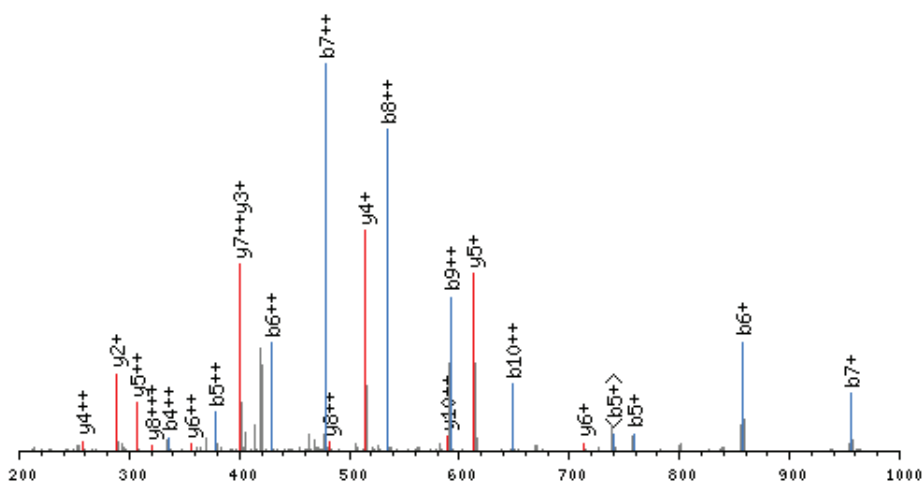

click image to zoom in; click top corners to zoom out [precursor±]

scan 5279; 490.7 m/z; 7.0e+004

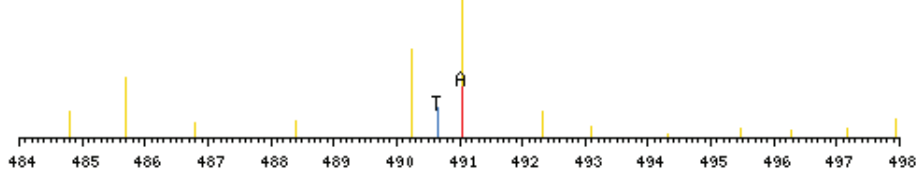

zoomed in precursor plot; T=theoretical m/z, A=acquired m/z

| b <sup>+</sup> | b <sup>2+</sup> | #  | AA | #  | y <sup>+</sup> | y <sup>2+</sup> | y <sup>3+</sup> |
|----------------|-----------------|----|----|----|----------------|-----------------|-----------------|
| 296.2796       | 148.6437        | 1  | H  | 11 |                |                 |                 |
| 393.3324       | 197.1701        | 2  | P  | 10 | 1174.6836      | 587.8457        | 392.2331        |
| 508.3593       | 254.6836        | 3  | D  | 9  | 1077.6308      | 539.3193        | 359.8822        |
| 671.4226       | 336.2152        | 4  | Y  | 8  | 962.6039       | 481.8059        | 321.5398        |
| 758.4547       | 379.7312        | 5  | S  | 7  | 799.5405       | 400.2742        | 267.1854        |
| 857.5231       | 429.2655        | 6  | V  | 6  | 712.5085       | 356.7582        | 238.1747        |
| 956.5915       | 478.7997        | 7  | V  | 5  | 613.4401       | 307.2240        | 205.1519        |
| 1069.6756      | 535.3417        | 8  | L  | 4  | 514.3717       | 257.6898        | 172.1291        |
| 1182.7596      | 591.8837        | 9  | L  | 3  | 401.2876       | 201.1477        | 134.4344        |
| 1295.8437      | 648.4258        | 10 | L  | 2  | 288.2036       | 144.6057        | 96.7397         |
|                |                 | 11 | R  | 1  | 175.1195       | 88.0637         | 59.0451         |

H(1) : +295.27

X-range:

400 - 1400

MassTol: Y-zoom:

0.950 1.00

ImageSize:

Sm  Lg

MassType:

AVG  MONO

Axis:

1  2

Label:

I  M  -

Ions:

a  +  2+  3+

b  +  2+  3+

c  +  2+  3+

x  +  2+  3+

y  +  2+  3+

z  +  2+  3+

hide H<sub>2</sub>O/NH<sub>3</sub>

zoom 112-122

zoom 124-133

GO

HPDYSVLLLRLLAKTYETLEK, MH+ 2747.6421, m/z 916.5522  
10HNE-1HSA-37Trypsin5-LTQ1.5575.5575.3.dta

scan 5575; 2.2e+004

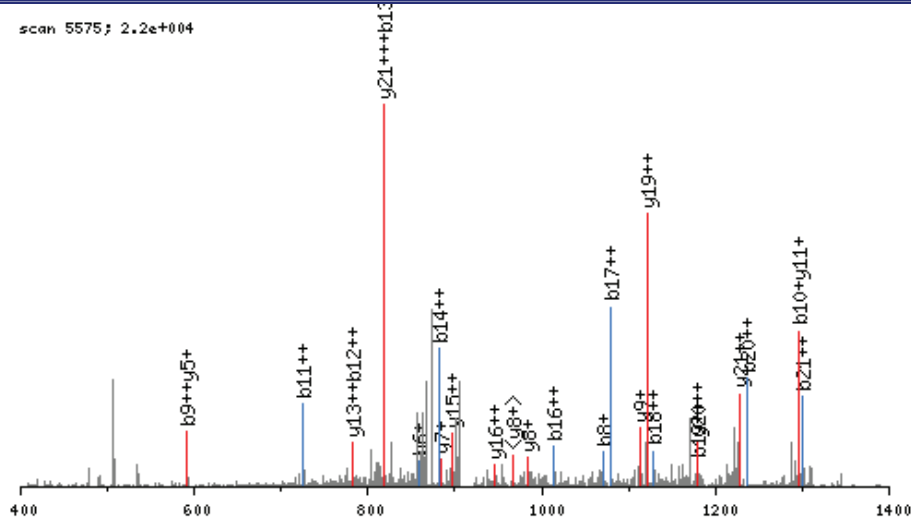

click image to zoom in; click top corners to zoom out [precursor±]

scan 5573; 916.6 m/z; 4.7e+005

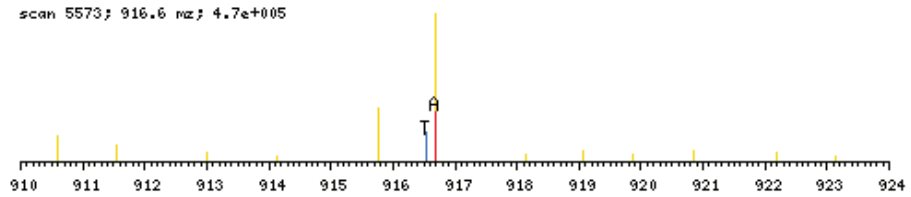

zoomed in precursor plot; T=theoretical m/z, A=acquired m/z

| b <sup>+</sup> | b <sup>2+</sup> | #  | AA | #  | y <sup>+</sup> | y <sup>2+</sup> | y <sup>3+</sup> |
|----------------|-----------------|----|----|----|----------------|-----------------|-----------------|
| 296.2796       | 148.6437        | 1  | H  | 22 |                |                 |                 |
| 393.3324       | 197.1701        | 2  | P  | 21 | 2452.3703      | 1226.6891       | 818.1287        |
| 508.3593       | 254.6836        | 3  | D  | 20 | 2355.3175      | 1178.1627       | 785.7777        |
| 671.4226       | 336.2152        | 4  | Y  | 19 | 2240.2906      | 1120.6492       | 747.4354        |
| 758.4547       | 379.7312        | 5  | S  | 18 | 2077.2273      | 1039.1175       | 693.0810        |
| 857.5231       | 429.2655        | 6  | V  | 17 | 1990.1952      | 995.6015        | 664.0703        |
| 956.5915       | 478.7997        | 7  | V  | 16 | 1891.1268      | 946.0673        | 631.0475        |
| 1069.6756      | 535.3417        | 8  | L  | 15 | 1792.0584      | 896.5331        | 598.0247        |
| 1182.7596      | 591.8837        | 9  | L  | 14 | 1678.9743      | 839.9911        | 560.3300        |
| 1295.8437      | 648.4258        | 10 | L  | 13 | 1565.8903      | 783.4491        | 522.6353        |
| 1451.9448      | 726.4763        | 11 | R  | 12 | 1452.8062      | 726.9070        | 484.9406        |
| 1565.0289      | 783.0183        | 12 | L  | 11 | 1296.7051      | 648.8565        | 432.9069        |
| 1636.0660      | 818.5369        | 13 | A  | 10 | 1183.6210      | 592.3144        | 395.2122        |
| 1764.1609      | 882.5844        | 14 | K  | 9  | 1112.5839      | 556.7959        | 371.5332        |
| 1865.2086      | 933.1082        | 15 | T  | 8  | 984.4890       | 492.7484        | 328.8349        |
| 2028.2719      | 1014.6399       | 16 | Y  | 7  | 883.4413       | 442.2246        | 295.1523        |
| 2157.3145      | 1079.1612       | 17 | E  | 6  | 720.3780       | 360.6929        | 240.7979        |
| 2258.3622      | 1129.6850       | 18 | T  | 5  | 591.3354       | 296.1716        | 197.7837        |
| 2359.4099      | 1180.2089       | 19 | T  | 4  | 490.2877       | 245.6478        | 164.1011        |
| 2472.4940      | 1236.7509       | 20 | L  | 3  | 389.2400       | 195.1239        | 130.4186        |
| 2601.5366      | 1301.2722       | 21 | E  | 2  | 276.1559       | 138.5819        | 92.7239         |
|                |                 | 22 | K  | 1  | 147.1134       | 74.0606         | 49.7097         |

H(1):+295.27

X-range: 200 - 1800  
 MassTol: 0.950 Y-zoom: 1.00  
 ImageSize:  Sm  Lg  
 MassType:  AVG  MONO  
 Axis:  1  2  
 Label:  I  M  -  
 Ions: a  +  2+  3+  
 b  +  2+  3+  
 c  +  2+  3+  
 x  +  2+  3+  
 y  +  2+  3+  
 z  +  2+  3+  
 hide H<sub>2</sub>O/NH<sub>3</sub>   
 zoom 112-122   
 zoom 124-133   
 GO

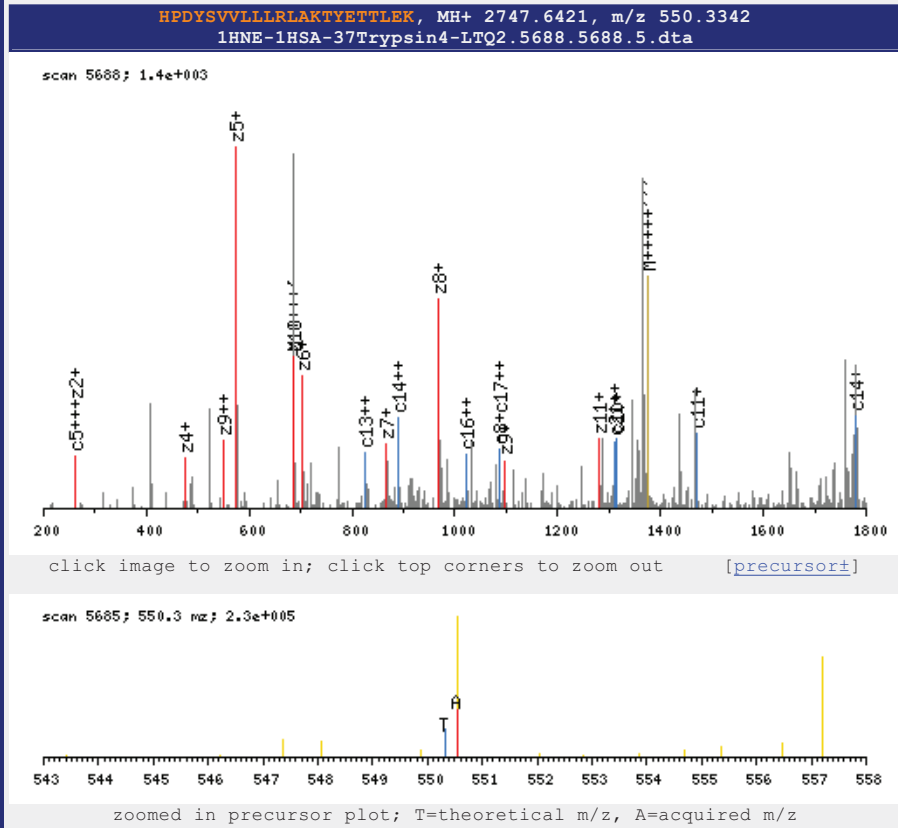

| c <sup>+</sup> | c <sup>2+</sup> | c <sup>3+</sup> | #  | AA | #  | z <sup>+</sup> | z <sup>2+</sup> | z <sup>3+</sup> |
|----------------|-----------------|-----------------|----|----|----|----------------|-----------------|-----------------|
| 313.3062       | 157.1570        | 105.1073        | 1  | H  | 22 |                |                 |                 |
| 410.3589       | 205.6834        | 137.4582        | 2  | P  | 21 | 2436.3516      | 1218.6797       | 812.7891        |
| 525.3859       | 263.1968        | 175.8005        | 3  | D  | 20 | 2339.2988      | 1170.1533       | 780.4382        |
| 688.4492       | 344.7285        | 230.1549        | 4  | Y  | 19 | 2224.2719      | 1112.6398       | 742.0958        |
| 775.4812       | 388.2445        | 259.1656        | 5  | S  | 18 | 2061.2085      | 1031.1082       | 687.7414        |
| 874.5496       | 437.7787        | 292.1884        | 6  | V  | 17 | 1974.1765      | 987.5922        | 658.7307        |
| 973.6180       | 487.3129        | 325.2112        | 7  | V  | 16 | 1875.1081      | 938.0580        | 625.7079        |
| 1086.7021      | 543.8550        | 362.9059        | 8  | L  | 15 | 1776.0397      | 888.5238        | 592.6851        |
| 1199.7862      | 600.3970        | 400.6006        | 9  | L  | 14 | 1662.9556      | 831.9817        | 554.9904        |
| 1312.8702      | 656.9390        | 438.2953        | 10 | L  | 13 | 1549.8716      | 775.4397        | 517.2957        |
| 1468.9713      | 734.9896        | 490.3290        | 11 | R  | 12 | 1436.7875      | 718.8977        | 479.6010        |
| 1582.0554      | 791.5316        | 528.0237        | 12 | L  | 11 | 1280.6864      | 640.8471        | 427.5673        |
| 1653.0925      | 827.0502        | 551.7027        | 13 | A  | 10 | 1167.6023      | 584.3051        | 389.8727        |
| 1781.1875      | 891.0977        | 594.4010        | 14 | K  | 9  | 1096.5652      | 548.7865        | 366.1936        |
| 1882.2352      | 941.6215        | 628.0836        | 15 | T  | 8  | 968.4702       | 484.7390        | 323.4953        |
| 2045.2985      | 1023.1532       | 682.4380        | 16 | Y  | 7  | 867.4226       | 434.2152        | 289.8127        |
| 2174.3411      | 1087.6745       | 725.4522        | 17 | E  | 6  | 704.3592       | 352.6835        | 235.4583        |
| 2275.3888      | 1138.1983       | 759.1348        | 18 | T  | 5  | 575.3166       | 288.1622        | 192.4441        |
| 2376.4364      | 1188.7221       | 792.8174        | 19 | T  | 4  | 474.2690       | 237.6384        | 158.7615        |
| 2489.5205      | 1245.2642       | 830.5121        | 20 | L  | 3  | 373.2213       | 187.1146        | 125.0790        |
| 2618.5631      | 1309.7855       | 873.5263        | 21 | E  | 2  | 260.1372       | 130.5725        | 87.3843         |
|                |                 |                 | 22 | K  | 1  | 131.0946       | 66.0512         | 44.3701         |

H(1):+295.27

X-range:

200 - 900

MassTol: Y-zoom:

0.950 1.00

ImageSize:

Sm  Lg

MassType:

AVG  MONO

Axis:

1  2

Label:

I  M  -

Ions:

a  +  2+  3+

b  +  2+  3+

c  +  2+  3+

x  +  2+  3+

y  +  2+  3+

z  +  2+  3+

hide H<sub>2</sub>O/NH<sub>3</sub>

zoom 112-122

zoom 124-133

GO

LAKTYETLEK, MH+ 1454.9149, m/z 485.6432  
1HNE-1HSA-37Trypsin5-LTQ1.4046.4046.3.dta

scan 4046; 3.1e+003

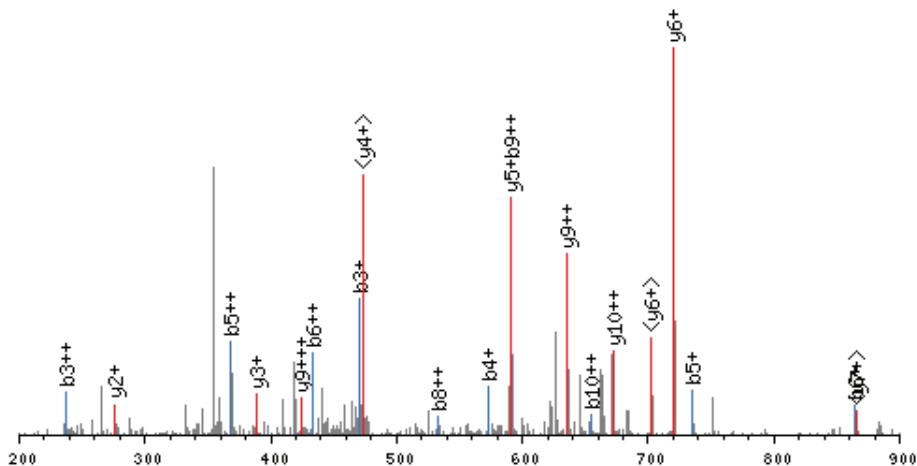

click image to zoom in; click top corners to zoom out [precursor±]

scan 4040; 485.6 m/z; 1.3e+005

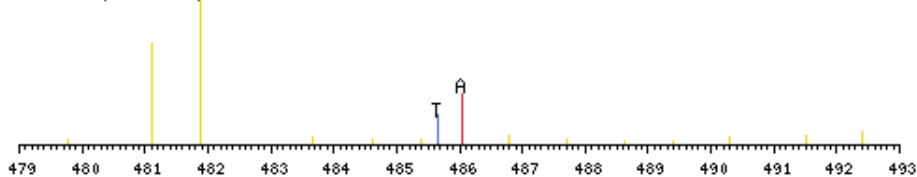

zoomed in precursor plot; T=theoretical m/z, A=acquired m/z

| b <sup>+</sup> | b <sup>2+</sup> | #  | AA | #  | y <sup>+</sup> | y <sup>2+</sup> | y <sup>3+</sup> |
|----------------|-----------------|----|----|----|----------------|-----------------|-----------------|
| 114.0919       | 57.5499         | 1  | L  | 11 |                |                 |                 |
| 185.1290       | 93.0684         | 2  | A  | 10 | 1341.8309      | 671.4193        | 447.9488        |
| 471.4338       | 236.2208        | 3  | K  | 9  | 1270.7937      | 635.9008        | 424.2698        |
| 572.4815       | 286.7446        | 4  | T  | 8  | 984.4890       | 492.7484        | 328.8349        |
| 735.5448       | 368.2763        | 5  | Y  | 7  | 883.4413       | 442.2246        | 295.1523        |
| 864.5874       | 432.7976        | 6  | E  | 6  | 720.3780       | 360.6929        | 240.7979        |
| 965.6351       | 483.3214        | 7  | T  | 5  | 591.3354       | 296.1716        | 197.7837        |
| 1066.6827      | 533.8453        | 8  | T  | 4  | 490.2877       | 245.6478        | 164.1011        |
| 1179.7668      | 590.3873        | 9  | L  | 3  | 389.2400       | 195.1239        | 130.4186        |
| 1308.8094      | 654.9086        | 10 | E  | 2  | 276.1559       | 138.5819        | 92.7239         |
|                |                 | 11 | K  | 1  | 147.1134       | 74.0606         | 49.7097         |

K (3) : +286.30

X-range:

200 - 900

MassTol: Y-zoom:

0.950 6.00

ImageSize:

 Sm  Lg

MassType:

 AVG  MONO

Axis:

 1  2

Label:

 I  M  -

Ions:

a  +  2+  3+b  +  2+  3+c  +  2+  3+x  +  2+  3+y  +  2+  3+z  +  2+  3+hide H<sub>2</sub>O/NH<sub>3</sub> zoom 112-122 zoom 124-133 

GO

LAKTYETLEK, MH+ 1436.9044, m/z 479.6396  
10HNE-1HSA-37Trypsin3-LTQ2.4333.4333.3.dta

scan 4333; 9.4e+003

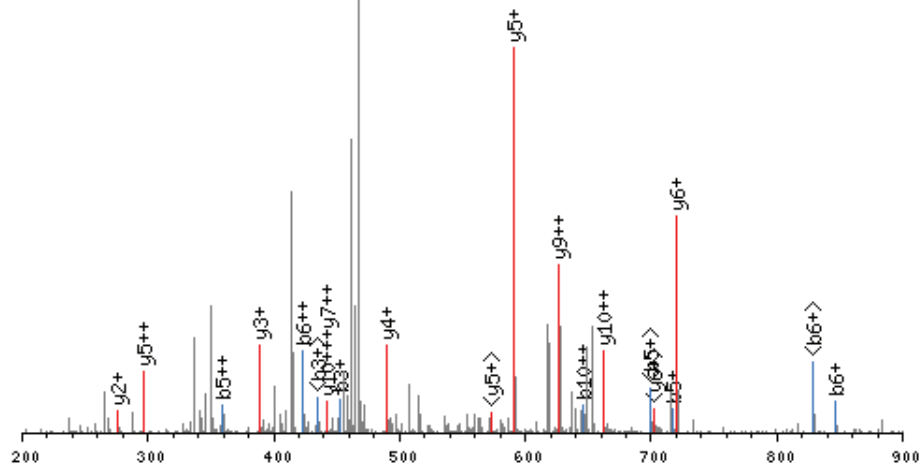

click image to zoom in; click top corners to zoom out [precursor±]

scan 4327; 479.6 m/z; 2.1e+005

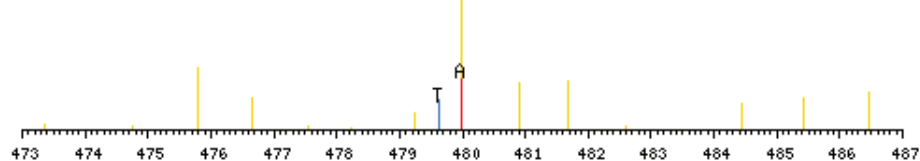

zoomed in precursor plot; T=theoretical m/z, A=acquired m/z

| b <sup>+</sup> | b <sup>2+</sup> | #  | AA | #  | y <sup>+</sup> | y <sup>2+</sup> | y <sup>3+</sup> |
|----------------|-----------------|----|----|----|----------------|-----------------|-----------------|
| 114.0919       | 57.5499         | 1  | L  | 11 |                |                 |                 |
| 185.1290       | 93.0684         | 2  | A  | 10 | 1323.8203      | 662.4141        | 441.9453        |
| 453.4232       | 227.2155        | 3  | K  | 9  | 1252.7832      | 626.8955        | 418.2663        |
| 554.4709       | 277.7394        | 4  | T  | 8  | 984.4890       | 492.7484        | 328.8349        |
| 717.5342       | 359.2710        | 5  | Y  | 7  | 883.4413       | 442.2246        | 295.1523        |
| 846.5768       | 423.7923        | 6  | E  | 6  | 720.3780       | 360.6929        | 240.7979        |
| 947.6245       | 474.3162        | 7  | T  | 5  | 591.3354       | 296.1716        | 197.7837        |
| 1048.6722      | 524.8400        | 8  | T  | 4  | 490.2877       | 245.6478        | 164.1011        |
| 1161.7562      | 581.3820        | 9  | L  | 3  | 389.2400       | 195.1239        | 130.4186        |
| 1290.7988      | 645.9033        | 10 | E  | 2  | 276.1559       | 138.5819        | 92.7239         |
|                |                 | 11 | K  | 1  | 147.1134       | 74.0606         | 49.7097         |

K(3) : +268.29



X-range:

200 - 1500

MassTol: Y-zoom:

0.950 1.00

ImageSize:

Sm  Lg

MassType:

AVG  MONO

Axis:

1  2

Label:

I  M  -

Ions:

a  +  2+  3+

b  +  2+  3+

c  +  2+  3+

x  +  2+  3+

y  +  2+  3+

z  +  2+  3+

hide H<sub>2</sub>O/NH<sub>3</sub>

zoom 112-122

zoom 124-133

GO

LAKTYETLEK, MH+ 1436.9044, m/z 479.6396  
10HNE-1HSA-37Trypsin5-LTQ4.4608.4608.3.dta

scan 4608; 1.1e+003

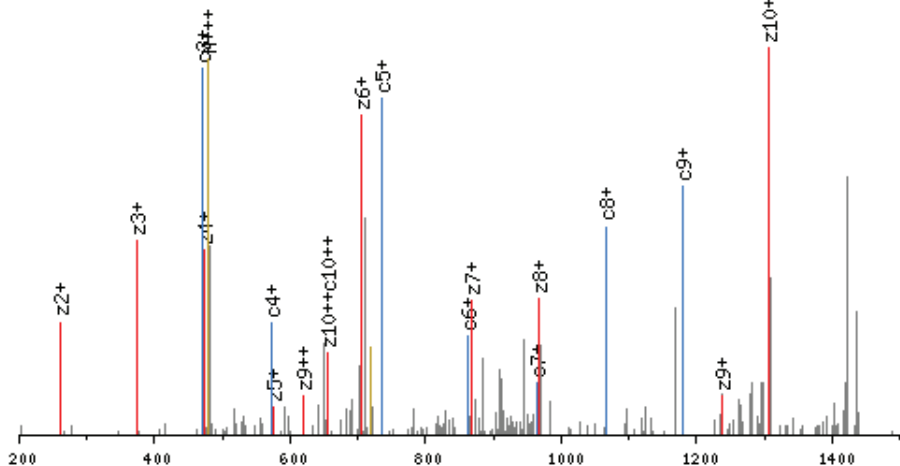

click image to zoom in; click top corners to zoom out [precursor±]

scan 4607; 479.6 m/z; 2.8e+005

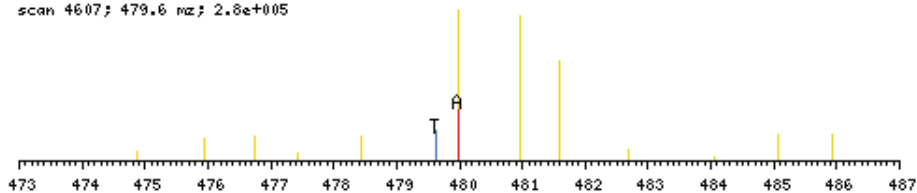

zoomed in precursor plot; T=theoretical m/z, A=acquired m/z

| c <sup>+</sup> | c <sup>2+</sup> | #  | AA | #  | z <sup>+</sup> | z <sup>2+</sup> | z <sup>3+</sup> |
|----------------|-----------------|----|----|----|----------------|-----------------|-----------------|
| 131.1184       | 66.0631         | 1  | L  | 11 |                |                 |                 |
| 202.1556       | 101.5817        | 2  | A  | 10 | 1307.8016      | 654.4047        | 436.6057        |
| 470.4498       | 235.7288        | 3  | K  | 9  | 1236.7645      | 618.8861        | 412.9267        |
| 571.4974       | 286.2526        | 4  | T  | 8  | 968.4702       | 484.7390        | 323.4953        |
| 734.5608       | 367.7843        | 5  | Y  | 7  | 867.4226       | 434.2152        | 289.8127        |
| 863.6034       | 432.3056        | 6  | E  | 6  | 704.3592       | 352.6835        | 235.4583        |
| 964.6510       | 482.8294        | 7  | T  | 5  | 575.3166       | 288.1622        | 192.4441        |
| 1065.6987      | 533.3533        | 8  | T  | 4  | 474.2690       | 237.6384        | 158.7615        |
| 1178.7828      | 589.8953        | 9  | L  | 3  | 373.2213       | 187.1146        | 125.0790        |
| 1307.8254      | 654.4166        | 10 | E  | 2  | 260.1372       | 130.5725        | 87.3843         |
|                |                 | 11 | K  | 1  | 131.0946       | 66.0512         | 44.3701         |

K (3) : +268.29

X-range:

200 - 1800

MassTol: Y-zoom:

0.950 1.00

ImageSize:

Sm  Lg

MassType:

AVG  MONO

Axis:

1  2

Label:

I  M  -

Ions:

a  +  2+  3+

b  +  2+  3+

c  +  2+  3+

x  +  2+  3+

y  +  2+  3+

z  +  2+  3+

hide H<sub>2</sub>O/NH<sub>3</sub>

zoom 112-122

zoom 124-133

GO

TYETLEKCCAAADPHECYAK, MH+ 2676.6676, m/z 892.8941  
10HNE-1HSA-37Trypsin5-LTQ4.4613.4613.3.dta

scan 4613; 1.4e+003

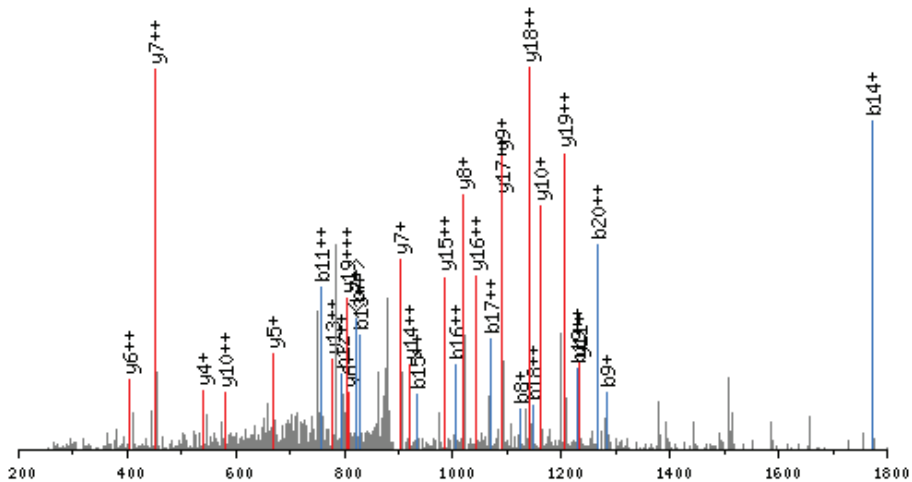

click image to zoom in; click top corners to zoom out [\[precursor±\]](#)

scan 4607; 892.9 m/z; 2.2e+005

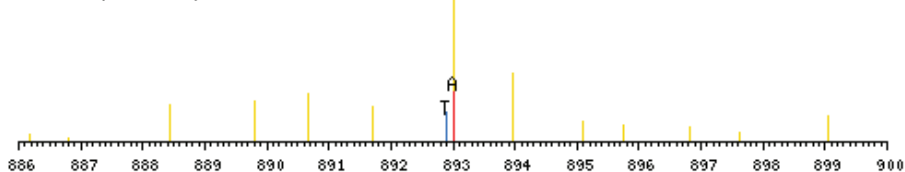

zoomed in precursor plot; T=theoretical m/z, A=acquired m/z

| b <sup>+</sup> | b <sup>2+</sup> | #  | AA | #  | y <sup>+</sup> | y <sup>2+</sup> | y <sup>3+</sup> |
|----------------|-----------------|----|----|----|----------------|-----------------|-----------------|
| 102.0555       | 51.5317         | 1  | T  | 21 |                |                 |                 |
| 265.1188       | 133.0633        | 2  | Y  | 20 | 2575.6200      | 1288.3139       | 859.2119        |
| 394.1614       | 197.5846        | 3  | E  | 19 | 2412.5566      | 1206.7822       | 804.8574        |
| 495.2091       | 248.1085        | 4  | T  | 18 | 2283.5140      | 1142.2609       | 761.8432        |
| 596.2568       | 298.6323        | 5  | T  | 17 | 2182.4664      | 1091.7371       | 728.1607        |
| 709.3408       | 355.1743        | 6  | L  | 16 | 2081.4187      | 1041.2133       | 694.4781        |
| 838.3834       | 419.6956        | 7  | E  | 15 | 1968.3346      | 984.6712        | 656.7834        |
| 1124.6882      | 562.8480        | 8  | K  | 14 | 1839.2920      | 920.1499        | 613.7692        |
| 1284.8485      | 642.9282        | 9  | C  | 13 | 1552.9872      | 776.9975        | 518.3343        |
| 1445.0088      | 723.0083        | 10 | C  | 12 | 1392.8269      | 696.9174        | 464.9475        |
| 1516.0459      | 758.5269        | 11 | A  | 11 | 1232.6666      | 616.8372        | 411.5608        |
| 1587.0830      | 794.0454        | 12 | A  | 10 | 1161.6295      | 581.3187        | 387.8817        |
| 1658.1202      | 829.5640        | 13 | A  | 9  | 1090.5924      | 545.8001        | 364.2027        |
| 1773.1471      | 887.0775        | 14 | D  | 8  | 1019.5553      | 510.2816        | 340.5237        |
| 1870.1999      | 935.6038        | 15 | P  | 7  | 904.5284       | 452.7681        | 302.1813        |
| 2007.2588      | 1004.1333       | 16 | H  | 6  | 807.4756       | 404.2417        | 269.8304        |
| 2136.3014      | 1068.6546       | 17 | E  | 5  | 670.4167       | 335.7123        | 224.1441        |
| 2296.4617      | 1148.7347       | 18 | C  | 4  | 541.3741       | 271.1910        | 181.1299        |
| 2459.5250      | 1230.2664       | 19 | Y  | 3  | 381.2138       | 191.1108        | 127.7431        |
| 2530.5621      | 1265.7850       | 20 | A  | 2  | 218.1505       | 109.5791        | 73.3887         |
|                |                 | 21 | K  | 1  | 147.1134       | 74.0606         | 49.7097         |

K(8):+286.30 C(9):+160.16 C(10):+160.16 C(18):+160.16

X-range: 400 - 1800  
 MassTol: Y-zoom: 0.950 1.00  
 ImageSize:  Sm  Lg  
 MassType:  AVG  MONO  
 Axis:  1  2  
 Label:  I  M  -  
 Ions: a  +  2+  3+  
 b  +  2+  3+  
 c  +  2+  3+  
 x  +  2+  3+  
 y  +  2+  3+  
 z  +  2+  3+  
 hide H<sub>2</sub>O/NH<sub>3</sub>   
 zoom 112-122   
 zoom 124-133   
 GO

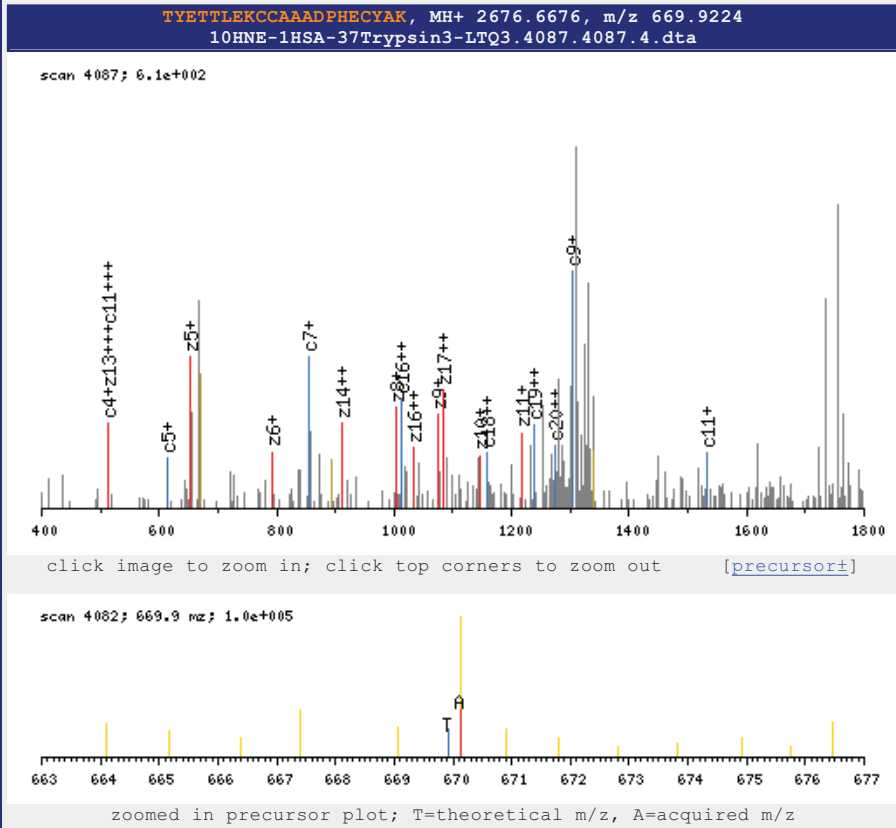

| c <sup>+</sup> | c <sup>2+</sup> | c <sup>3+</sup> | #  | AA | #  | z <sup>+</sup> | z <sup>2+</sup> | z <sup>3+</sup> |
|----------------|-----------------|-----------------|----|----|----|----------------|-----------------|-----------------|
| 119.0821       | 60.0449         | 40.3659         | 1  | T  | 21 |                |                 |                 |
| 282.1454       | 141.5766        | 94.7203         | 2  | Y  | 20 | 2559.6012      | 1280.3045       | 853.8723        |
| 411.1880       | 206.0979        | 137.7345        | 3  | E  | 19 | 2396.5379      | 1198.7729       | 799.5179        |
| 512.2357       | 256.6217        | 171.4171        | 4  | T  | 18 | 2267.4953      | 1134.2516       | 756.5037        |
| 613.2833       | 307.1456        | 205.0997        | 5  | T  | 17 | 2166.4476      | 1083.7277       | 722.8211        |
| 726.3674       | 363.6876        | 242.7943        | 6  | L  | 16 | 2065.4000      | 1033.2039       | 689.1385        |
| 855.4100       | 428.2089        | 285.8085        | 7  | E  | 15 | 1952.3159      | 976.6619        | 651.4438        |
| 1141.7148      | 571.3613        | 381.2435        | 8  | K  | 14 | 1823.2733      | 912.1406        | 608.4297        |
| 1301.8751      | 651.4414        | 434.6302        | 9  | C  | 13 | 1536.9685      | 768.9882        | 512.9947        |
| 1462.0354      | 731.5216        | 488.0170        | 10 | C  | 12 | 1376.8082      | 688.9080        | 459.6080        |
| 1533.0725      | 767.0402        | 511.6960        | 11 | A  | 11 | 1216.6479      | 608.8279        | 406.2212        |
| 1604.1096      | 802.5587        | 535.3751        | 12 | A  | 10 | 1145.6108      | 573.3093        | 382.5422        |
| 1675.1467      | 838.0773        | 559.0541        | 13 | A  | 9  | 1074.5737      | 537.7908        | 358.8631        |
| 1790.1737      | 895.5907        | 597.3964        | 14 | D  | 8  | 1003.5366      | 502.2722        | 335.1841        |
| 1887.2264      | 944.1171        | 629.7474        | 15 | P  | 7  | 888.5096       | 444.7587        | 296.8418        |
| 2024.2853      | 1012.6466       | 675.4337        | 16 | H  | 6  | 791.4569       | 396.2324        | 264.4908        |
| 2153.3279      | 1077.1679       | 718.4479        | 17 | E  | 5  | 654.3980       | 327.7029        | 218.8045        |
| 2313.4882      | 1157.2480       | 771.8346        | 18 | C  | 4  | 525.3554       | 263.1816        | 175.7903        |
| 2476.5516      | 1238.7797       | 826.1891        | 19 | Y  | 3  | 365.1951       | 183.1014        | 122.4036        |
| 2547.5887      | 1274.2982       | 849.8681        | 20 | A  | 2  | 202.1317       | 101.5698        | 68.0491         |
|                |                 |                 | 21 | K  | 1  | 131.0946       | 66.0512         | 44.3701         |

K(8):+286.30 C(9):+160.16 C(10):+160.16 C(18):+160.16

X-range: 200 - 1600  
 MassTol: Y-zoom: 0.950 1.00  
 ImageSize:  Sm  Lg  
 MassType:  AVG  MONO  
 Axis:  1  2  
 Label:  I  M  -  
 Ions: a  +  2+  3+  
 b  +  2+  3+  
 c  +  2+  3+  
 x  +  2+  3+  
 y  +  2+  3+  
 z  +  2+  3+  
 hide H<sub>2</sub>O/NH<sub>3</sub>   
 zoom 112-122   
 zoom 124-133   
 GO

CCAAADPHECYAK, MH+ 1711.2001, m/z 856.1037  
 10HNE-1HSA-37Trypsin2-LTQ1.3482.3482.2.dta

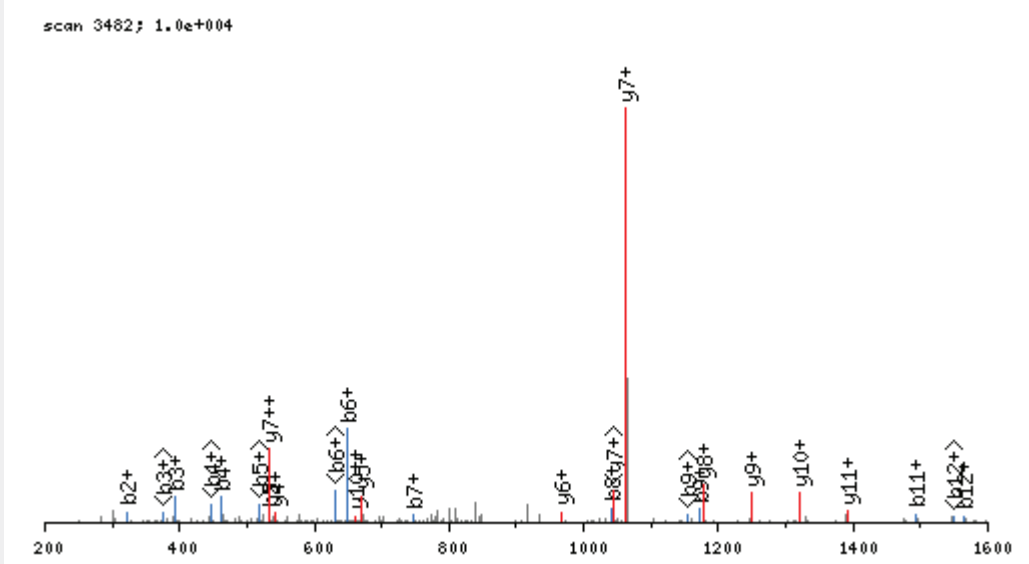

click image to zoom in; click top corners to zoom out [precursor±]

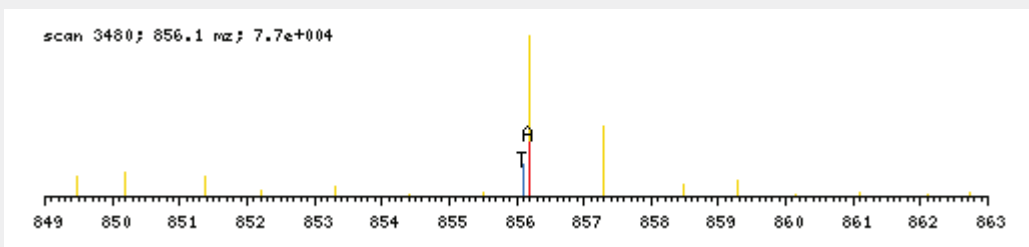

zoomed in precursor plot; T=theoretical m/z, A=acquired m/z

| b <sup>+</sup> | #  | AA | #  | y <sup>+</sup> | y <sup>2+</sup> |
|----------------|----|----|----|----------------|-----------------|
| 161.1681       | 1  | C  | 13 |                |                 |
| 321.3284       | 2  | C  | 12 | 1551.0398      | 776.0238        |
| 392.3655       | 3  | A  | 11 | 1390.8795      | 695.9437        |
| 463.4027       | 4  | A  | 10 | 1319.8424      | 660.4251        |
| 534.4398       | 5  | A  | 9  | 1248.8053      | 624.9066        |
| 649.4667       | 6  | D  | 8  | 1177.7682      | 589.3880        |
| 746.5195       | 7  | P  | 7  | 1062.7412      | 531.8745        |
| 1041.7913      | 8  | H  | 6  | 965.6885       | 483.3481        |
| 1170.8338      | 9  | E  | 5  | 670.4167       | 335.7123        |
| 1330.9941      | 10 | C  | 4  | 541.3741       | 271.1910        |
| 1494.0575      | 11 | Y  | 3  | 381.2138       | 191.1108        |
| 1565.0946      | 12 | A  | 2  | 218.1505       | 109.5791        |
|                | 13 | K  | 1  | 147.1134       | 74.0606         |

C(1):+160.16 C(2):+160.16 H(8):+295.27  
 C(10):+160.16

X-range: 300 - 1400  
 MassTol: Y-zoom: 0.950 1.00  
 ImageSize:  Sm  Lg  
 MassType:  AVG  MONO  
 Axis:  1  2  
 Label:  I  M  -  
 Ions: a  +  2+  3+  
 b  +  2+  3+  
 c  +  2+  3+  
 x  +  2+  3+  
 y  +  2+  3+  
 z  +  2+  3+  
 hide H<sub>2</sub>O/NH<sub>3</sub>   
 zoom 112-122   
 zoom 124-133   
 GO

VFDEFKPLVEEPQNLK, MH+ 2203.3057, m/z 735.1068  
 10HNE-1HSA-37Trypsin4-LTQ1.5563.5563.3.dta

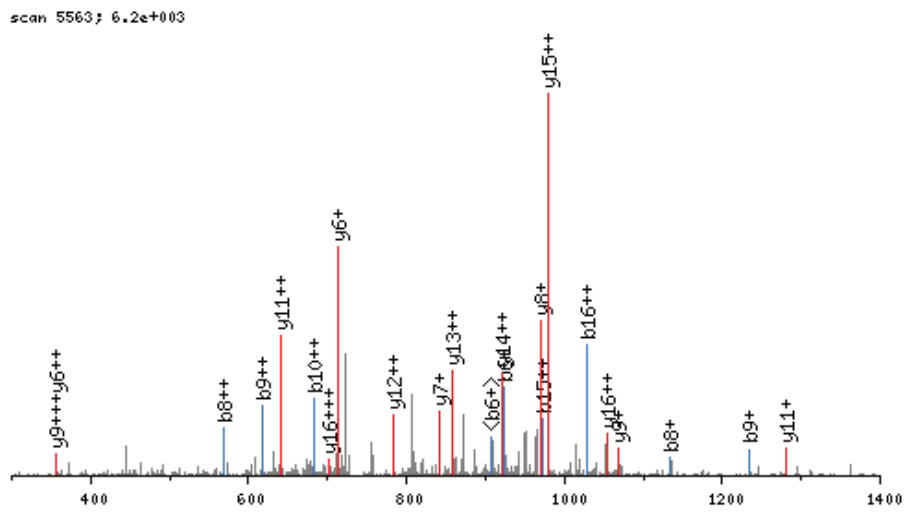

click image to zoom in; click top corners to zoom out [\[precursor±\]](#)

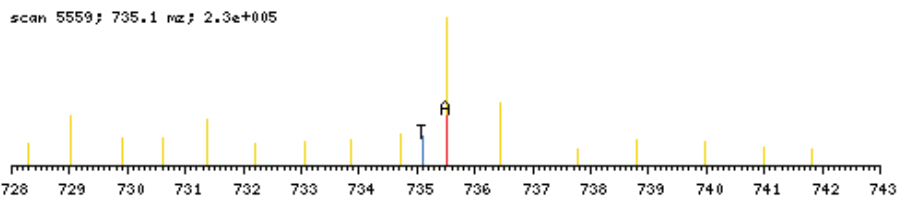

zoomed in precursor plot; T=theoretical m/z, A=acquired m/z

| b <sup>+</sup> | b <sup>2+</sup> | #  | AA | #  | y <sup>+</sup> | y <sup>2+</sup> | y <sup>3+</sup> |
|----------------|-----------------|----|----|----|----------------|-----------------|-----------------|
| 100.0762       | 50.5420         | 1  | V  | 17 |                |                 |                 |
| 247.1447       | 124.0762        | 2  | F  | 16 | 2104.2373      | 1052.6226       | 702.0843        |
| 362.1716       | 181.5897        | 3  | D  | 15 | 1957.1689      | 979.0884        | 653.0615        |
| 491.2142       | 246.1110        | 4  | E  | 14 | 1842.1420      | 921.5749        | 614.7192        |
| 638.2826       | 319.6452        | 5  | F  | 13 | 1713.0994      | 857.0536        | 571.7050        |
| 924.5874       | 462.7976        | 6  | K  | 12 | 1566.0310      | 783.5194        | 522.6822        |
| 1021.6401      | 511.3240        | 7  | P  | 11 | 1279.7262      | 640.3670        | 427.2473        |
| 1134.7242      | 567.8660        | 8  | L  | 10 | 1182.6734      | 591.8406        | 394.8964        |
| 1233.7926      | 617.4002        | 9  | V  | 9  | 1069.5893      | 535.2986        | 357.2017        |
| 1362.8352      | 681.9215        | 10 | E  | 8  | 970.5209       | 485.7644        | 324.1789        |
| 1491.8778      | 746.4428        | 11 | E  | 7  | 841.4783       | 421.2431        | 281.1647        |
| 1588.9306      | 794.9692        | 12 | P  | 6  | 712.4357       | 356.7218        | 238.1505        |
| 1716.9892      | 858.9985        | 13 | Q  | 5  | 615.3830       | 308.1954        | 205.7995        |
| 1831.0321      | 916.0200        | 14 | N  | 4  | 487.3244       | 244.1661        | 163.1134        |
| 1944.1161      | 972.5620        | 15 | L  | 3  | 373.2815       | 187.1447        | 125.0990        |
| 2057.2002      | 1029.1040       | 16 | I  | 2  | 260.1974       | 130.6026        | 87.4044         |
|                |                 | 17 | K  | 1  | 147.1134       | 74.0606         | 49.7097         |

K(6) :+286.30

X-range:

300 - 1900

MassTol: Y-zoom:

0.950 1.00

ImageSize:

Sm  Lg

MassType:

AVG  MONO

Axis:

1  2

Label:

I  M  -

Ions:

a  +  2+  3+

b  +  2+  3+

c  +  2+  3+

x  +  2+  3+

y  +  2+  3+

z  +  2+  3+

hide H<sub>2</sub>O/NH<sub>3</sub>

zoom 112-122

zoom 124-133

GO

VFDEFKPLVEEPQNLIK, MH+ 2203.3057, m/z 735.1068  
10HNE-1HSA-37Trypsin3-LTQ3.6050.6050.3.dta

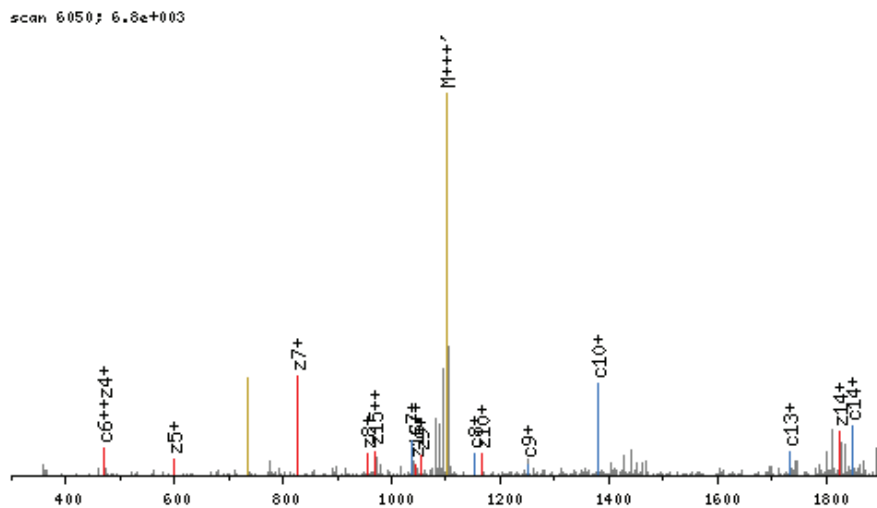

click image to zoom in; click top corners to zoom out [\[precursor±\]](#)

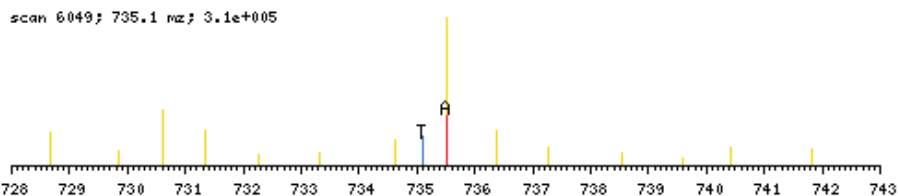

zoomed in precursor plot; T=theoretical m/z, A=acquired m/z

| c <sup>+</sup> | c <sup>2+</sup> | #  | AA | #  | z <sup>+</sup> | z <sup>2+</sup> | z <sup>3+</sup> |
|----------------|-----------------|----|----|----|----------------|-----------------|-----------------|
| 117.1028       | 59.0553         | 1  | V  | 17 |                |                 |                 |
| 264.1712       | 132.5895        | 2  | F  | 16 | 2088.2186      | 1044.6132       | 696.7447        |
| 379.1981       | 190.1030        | 3  | D  | 15 | 1941.1502      | 971.0790        | 647.7219        |
| 508.2407       | 254.6243        | 4  | E  | 14 | 1826.1232      | 913.5655        | 609.3796        |
| 655.3092       | 328.1585        | 5  | F  | 13 | 1697.0806      | 849.0442        | 566.3654        |
| 941.6139       | 471.3109        | 6  | K  | 12 | 1550.0122      | 775.5100        | 517.3426        |
| 1038.6667      | 519.8373        | 7  | P  | 11 | 1263.7075      | 632.3576        | 421.9077        |
| 1151.7508      | 576.3793        | 8  | L  | 10 | 1166.6547      | 583.8313        | 389.5568        |
| 1250.8192      | 625.9135        | 9  | V  | 9  | 1053.5706      | 527.2892        | 351.8621        |
| 1379.8618      | 690.4348        | 10 | E  | 8  | 954.5022       | 477.7550        | 318.8393        |
| 1508.9044      | 754.9561        | 11 | E  | 7  | 825.4596       | 413.2337        | 275.8251        |
| 1605.9571      | 803.4825        | 12 | P  | 6  | 696.4170       | 348.7124        | 232.8109        |
| 1734.0157      | 867.5118        | 13 | Q  | 5  | 599.3643       | 300.1860        | 200.4600        |
| 1848.0586      | 924.5332        | 14 | N  | 4  | 471.3057       | 236.1568        | 157.7738        |
| 1961.1427      | 981.0753        | 15 | L  | 3  | 357.2628       | 179.1353        | 119.7595        |
| 2074.2268      | 1037.6173       | 16 | I  | 2  | 244.1787       | 122.5933        | 82.0648         |
|                |                 | 17 | K  | 1  | 131.0946       | 66.0512         | 44.3701         |

K(6):+286.30

X-range: 300 - 1400  
 MassTol: Y-zoom: 0.950 1.00  
 ImageSize:  Sm  Lg  
 MassType:  AVG  MONO  
 Axis:  1  2  
 Label:  I  M  -  
 Ions: a  +  2+  3+  
 b  +  2+  3+  
 c  +  2+  3+  
 x  +  2+  3+  
 y  +  2+  3+  
 z  +  2+  3+  
 hide H<sub>2</sub>O/NH<sub>3</sub>   
 zoom 112-122   
 zoom 124-133   
 GO

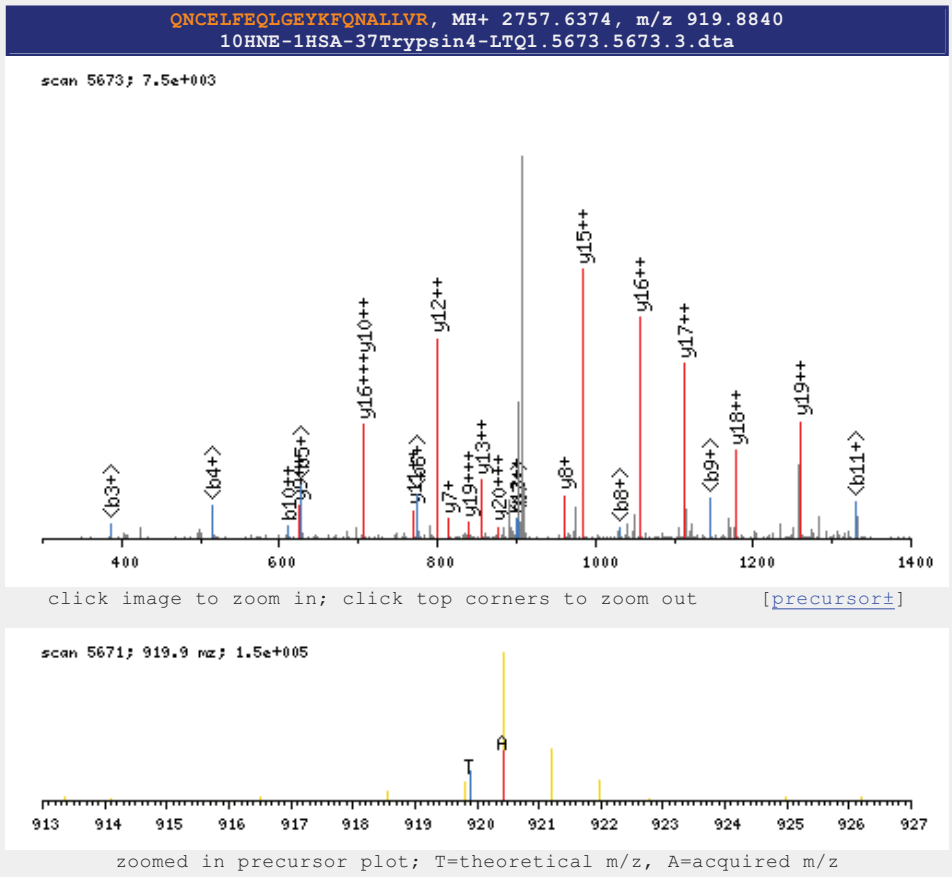

| b <sup>+</sup> | b <sup>2+</sup> | #  | AA | #  | y <sup>+</sup> | y <sup>2+</sup> | y <sup>3+</sup> |
|----------------|-----------------|----|----|----|----------------|-----------------|-----------------|
| 129.0664       | 65.0371         | 1  | Q  | 21 |                |                 |                 |
| 243.1093       | 122.0586        | 2  | N  | 20 | 2629.5788      | 1315.2933       | 877.1981        |
| 403.2696       | 202.1387        | 3  | C  | 19 | 2515.5358      | 1258.2718       | 839.1838        |
| 532.3122       | 266.6600        | 4  | E  | 18 | 2355.3755      | 1178.1917       | 785.7971        |
| 645.3963       | 323.2021        | 5  | L  | 17 | 2226.3330      | 1113.6704       | 742.7829        |
| 792.4647       | 396.7363        | 6  | F  | 16 | 2113.2489      | 1057.1284       | 705.0882        |
| 921.5073       | 461.2576        | 7  | E  | 15 | 1966.1805      | 983.5942        | 656.0654        |
| 1049.5659      | 525.2868        | 8  | Q  | 14 | 1837.1379      | 919.0729        | 613.0512        |
| 1162.6499      | 581.8289        | 9  | L  | 13 | 1709.0793      | 855.0436        | 570.3650        |
| 1219.6714      | 610.3396        | 10 | G  | 12 | 1595.9952      | 798.5015        | 532.6703        |
| 1348.7140      | 674.8609        | 11 | E  | 11 | 1538.9738      | 769.9908        | 513.6631        |
| 1511.7773      | 756.3926        | 12 | Y  | 10 | 1409.9312      | 705.4695        | 470.6489        |
| 1798.0821      | 899.5450        | 13 | K  | 9  | 1246.8679      | 623.9378        | 416.2945        |
| 1945.1505      | 973.0792        | 14 | F  | 8  | 960.5631       | 480.7855        | 320.8596        |
| 2073.2091      | 1037.1085       | 15 | Q  | 7  | 813.4947       | 407.2512        | 271.8368        |
| 2187.2520      | 1094.1299       | 16 | N  | 6  | 685.4361       | 343.2220        | 229.1506        |
| 2258.2891      | 1129.6485       | 17 | A  | 5  | 571.3932       | 286.2005        | 191.1363        |
| 2371.3732      | 1186.1905       | 18 | L  | 4  | 500.3560       | 250.6819        | 167.4572        |
| 2484.4573      | 1242.7325       | 19 | L  | 3  | 387.2720       | 194.1399        | 129.7625        |
| 2583.5257      | 1292.2668       | 20 | V  | 2  | 274.1879       | 137.5979        | 92.0679         |
|                |                 | 21 | R  | 1  | 175.1195       | 88.0637         | 59.0451         |

C(3):+160.16 K(13):+286.30

X-range:

200 - 1200

MassTol: Y-zoom:

0.950 7.00

ImageSize:

Sm  Lg

MassType:

AVG  MONO

Axis:

1  2

Label:

I  M  -

Ions:

a  +  2+  3+

b  +  2+  3+

c  +  2+  3+

x  +  2+  3+

y  +  2+  3+

z  +  2+  3+

hide H<sub>2</sub>O/NH<sub>3</sub>

zoom 112-122

zoom 124-133

GO

KVPQVSTPTLVEVSR, MH+ 1798.1481, m/z 600.0542  
10HNE-1HSA-37Trypsin4-LTQ2.5227.5227.3.dta

scan 5227; 7.9e+003

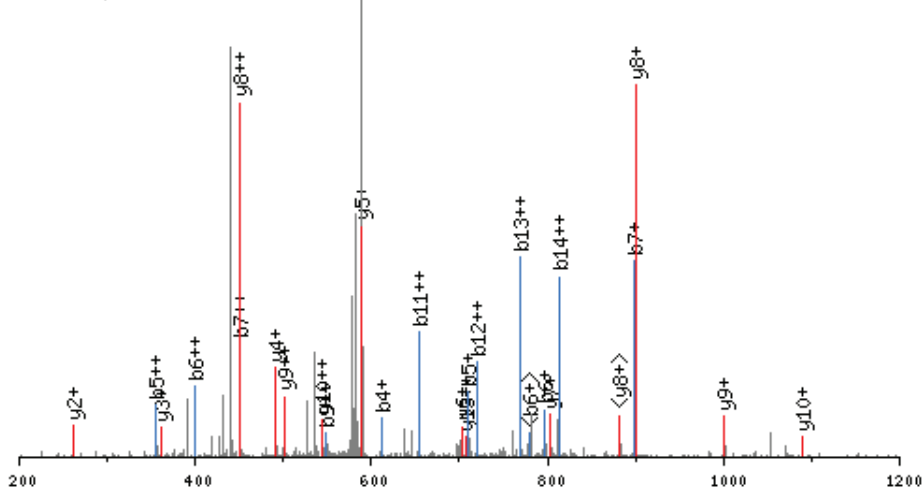

click image to zoom in; click top corners to zoom out [precursor±]

scan 5223; 600.1 m/z; 1.9e+006

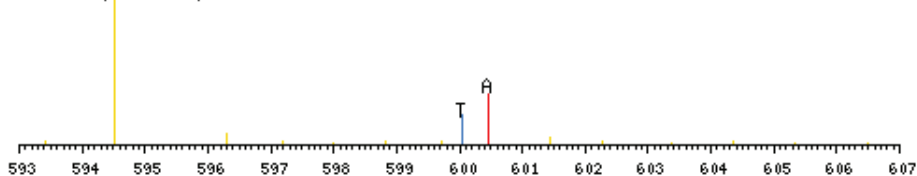

zoomed in precursor plot; T=theoretical m/z, A=acquired m/z

| b <sup>+</sup> | b <sup>2+</sup> | #  | AA | #  | y <sup>+</sup> | y <sup>2+</sup> | y <sup>3+</sup> |
|----------------|-----------------|----|----|----|----------------|-----------------|-----------------|
| 287.3126       | 144.1602        | 1  | K  | 15 |                |                 |                 |
| 386.3810       | 193.6944        | 2  | V  | 14 | 1511.8433      | 756.4256        | 504.6197        |
| 483.4338       | 242.2208        | 3  | P  | 13 | 1412.7749      | 706.8914        | 471.5969        |
| 611.4924       | 306.2501        | 4  | Q  | 12 | 1315.7222      | 658.3650        | 439.2459        |
| 710.5608       | 355.7843        | 5  | V  | 11 | 1187.6636      | 594.3357        | 396.5597        |
| 797.5928       | 399.3003        | 6  | S  | 10 | 1088.5952      | 544.8015        | 363.5369        |
| 898.6405       | 449.8242        | 7  | T  | 9  | 1001.5631      | 501.2855        | 334.5263        |
| 995.6932       | 498.3505        | 8  | P  | 8  | 900.5155       | 450.7616        | 300.8437        |
| 1096.7409      | 548.8744        | 9  | T  | 7  | 803.4627       | 402.2353        | 268.4928        |
| 1209.8250      | 605.4164        | 10 | L  | 6  | 702.4150       | 351.7114        | 234.8102        |
| 1308.8934      | 654.9506        | 11 | V  | 5  | 589.3310       | 295.1694        | 197.1155        |
| 1437.9360      | 719.4719        | 12 | E  | 4  | 490.2625       | 245.6352        | 164.0927        |
| 1537.0044      | 769.0061        | 13 | V  | 3  | 361.2199       | 181.1139        | 121.0785        |
| 1624.0364      | 812.5221        | 14 | S  | 2  | 262.1515       | 131.5797        | 88.0557         |
|                |                 | 15 | R  | 1  | 175.1195       | 88.0637         | 59.0451         |

K(1) : +286.30



X-range: 200 - 1900  
 MassTol: Y-zoom: 0.950 1.00  
 ImageSize:  Sm  Lg  
 MassType:  AVG  MONO  
 Axis:  1  2  
 Label:  I  M  -  
 Ions: a  +  2+  3+  
 b  +  2+  3+  
 c  +  2+  3+  
 x  +  2+  3+  
 y  +  2+  3+  
 z  +  2+  3+  
 hide H<sub>2</sub>O/NH<sub>3</sub>   
 zoom 112-122   
 zoom 124-133   
 GO

KVPQVSTPTLVEVSR, MH+ 1798.1481, m/z 600.0542  
 10HNE-1HSA-37Trypsin5-LTQ4.5805.5805.3.dta

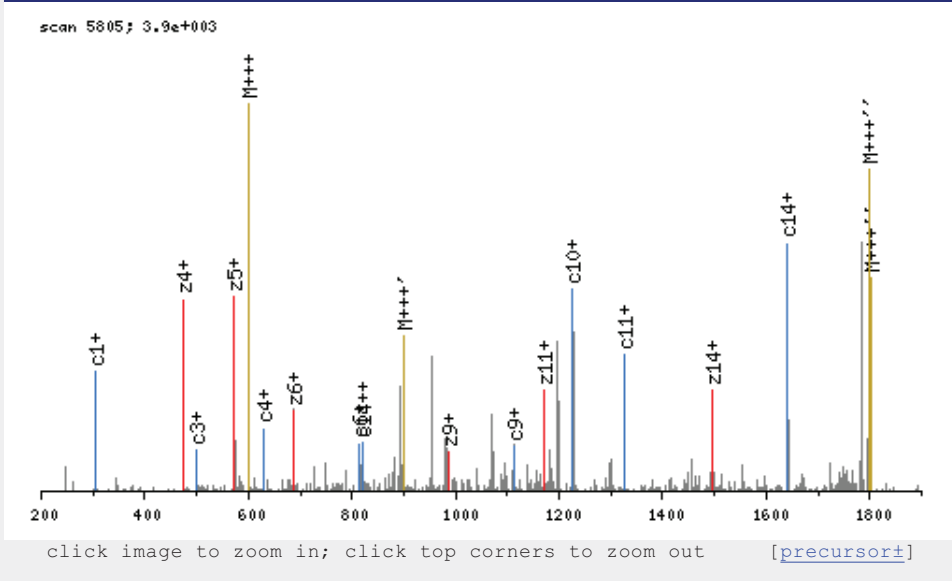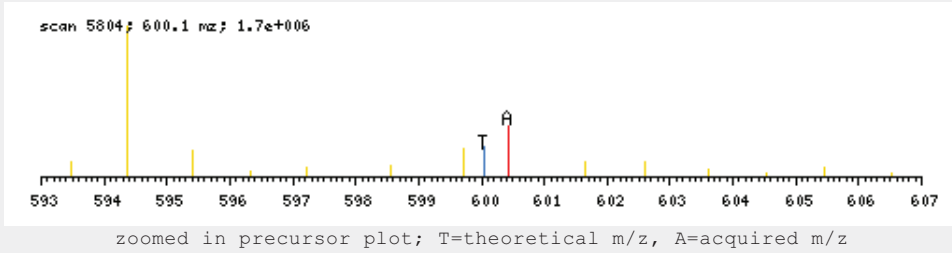

| c <sup>+</sup> | c <sup>2+</sup> | #  | AA | #  | z <sup>+</sup> | z <sup>2+</sup> | z <sup>3+</sup> |
|----------------|-----------------|----|----|----|----------------|-----------------|-----------------|
| 304.3392       | 152.6735        | 1  | K  | 15 |                |                 |                 |
| 403.4076       | 202.2077        | 2  | V  | 14 | 1495.8246      | 748.4162        | 499.2801        |
| 500.4603       | 250.7341        | 3  | P  | 13 | 1396.7562      | 698.8820        | 466.2573        |
| 628.5189       | 314.7634        | 4  | Q  | 12 | 1299.7034      | 650.3556        | 433.9064        |
| 727.5873       | 364.2976        | 5  | V  | 11 | 1171.6449      | 586.3263        | 391.2202        |
| 814.6194       | 407.8136        | 6  | S  | 10 | 1072.5764      | 536.7921        | 358.1974        |
| 915.6670       | 458.3374        | 7  | T  | 9  | 985.5444       | 493.2761        | 329.1867        |
| 1012.7198      | 506.8638        | 8  | P  | 8  | 884.4967       | 442.7523        | 295.5041        |
| 1113.7675      | 557.3876        | 9  | T  | 7  | 787.4440       | 394.2259        | 263.1532        |
| 1226.8515      | 613.9297        | 10 | L  | 6  | 686.3963       | 343.7021        | 229.4706        |
| 1325.9200      | 663.4639        | 11 | V  | 5  | 573.3122       | 287.1600        | 191.7760        |
| 1454.9625      | 727.9852        | 12 | E  | 4  | 474.2438       | 237.6258        | 158.7532        |
| 1554.0310      | 777.5194        | 13 | V  | 3  | 345.2012       | 173.1045        | 115.7390        |
| 1641.0630      | 821.0354        | 14 | S  | 2  | 246.1328       | 123.5703        | 82.7162         |
|                |                 | 15 | R  | 1  | 159.1008       | 80.0543         | 53.7055         |

K(1) : +286.30

X-range: 200 - 1100  
 MassTol: Y-zoom: 0.950 7.00  
 ImageSize:  Sm  Lg  
 MassType:  AVG  MONO  
 Axis:  1  2  
 Label:  I  M  -  
 Ions: a  +  2+  3+  
 b  +  2+  3+  
 c  +  2+  3+  
 x  +  2+  3+  
 y  +  2+  3+  
 z  +  2+  3+  
 hide H<sub>2</sub>O/NH<sub>3</sub>   
 zoom 112-122   
 zoom 124-133   
 GO

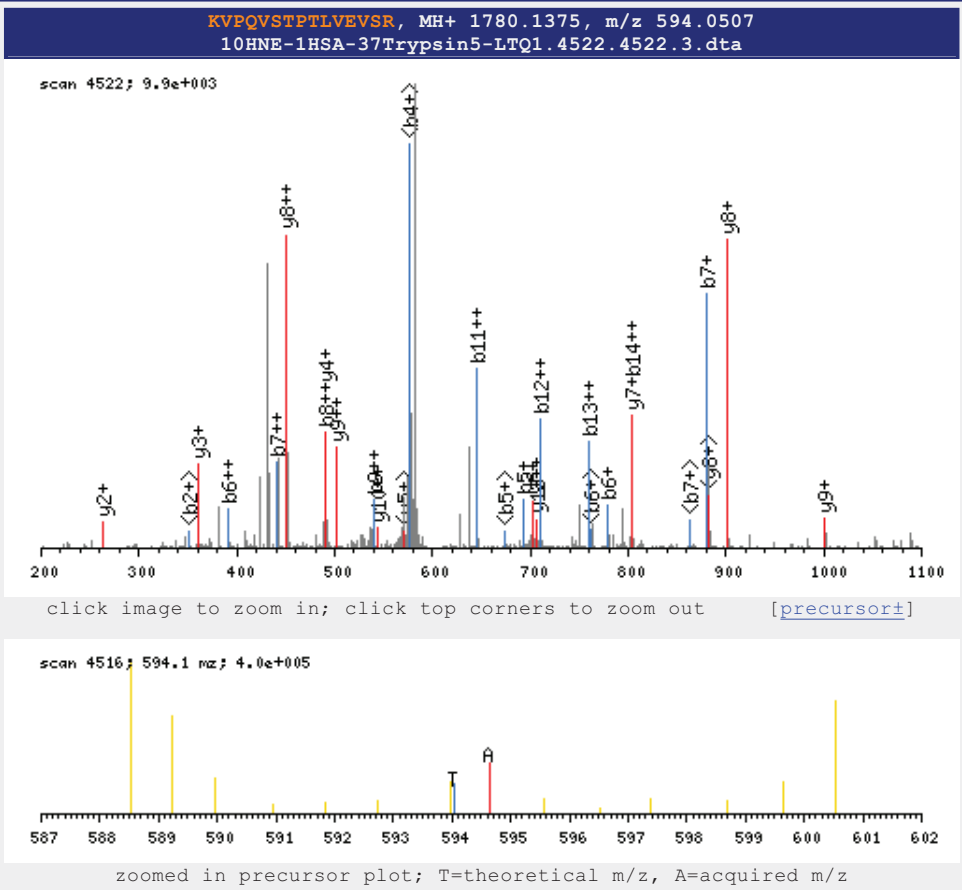

| b <sup>+</sup> | b <sup>2+</sup> | #  | AA | #  | y <sup>+</sup> | y <sup>2+</sup> | y <sup>3+</sup> |
|----------------|-----------------|----|----|----|----------------|-----------------|-----------------|
| 269.3020       | 135.1549        | 1  | K  | 15 |                |                 |                 |
| 368.3705       | 184.6891        | 2  | V  | 14 | 1511.8433      | 756.4256        | 504.6197        |
| 465.4232       | 233.2155        | 3  | P  | 13 | 1412.7749      | 706.8914        | 471.5969        |
| 593.4818       | 297.2448        | 4  | Q  | 12 | 1315.7222      | 658.3650        | 439.2459        |
| 692.5502       | 346.7790        | 5  | V  | 11 | 1187.6636      | 594.3357        | 396.5597        |
| 779.5822       | 390.2950        | 6  | S  | 10 | 1088.5952      | 544.8015        | 363.5369        |
| 880.6299       | 440.8189        | 7  | T  | 9  | 1001.5631      | 501.2855        | 334.5263        |
| 977.6827       | 489.3453        | 8  | P  | 8  | 900.5155       | 450.7616        | 300.8437        |
| 1078.7304      | 539.8691        | 9  | T  | 7  | 803.4627       | 402.2353        | 268.4928        |
| 1191.8144      | 596.4111        | 10 | L  | 6  | 702.4150       | 351.7114        | 234.8102        |
| 1290.8828      | 645.9453        | 11 | V  | 5  | 589.3310       | 295.1694        | 197.1155        |
| 1419.9254      | 710.4666        | 12 | E  | 4  | 490.2625       | 245.6352        | 164.0927        |
| 1518.9938      | 760.0008        | 13 | V  | 3  | 361.2199       | 181.1139        | 121.0785        |
| 1606.0259      | 803.5168        | 14 | S  | 2  | 262.1515       | 131.5797        | 88.0557         |
|                |                 | 15 | R  | 1  | 175.1195       | 88.0637         | 59.0451         |

K(1) : +268.29

X-range: 200 - 1800  
 MassTol: 0.950 Y-zoom: 5.00  
 ImageSize: Sm Lg  
 MassType: AVG MONO  
 Axis: 1 2  
 Label: I M -  
 Ions: a + 2+ 3+  
 b + 2+ 3+  
 c + 2+ 3+  
 x + 2+ 3+  
 y + 2+ 3+  
 z + 2+ 3+  
 hide H<sub>2</sub>O/NH<sub>3</sub>  
 zoom 112-122  
 zoom 124-133  
 GO

KVPQVSTPTLVEVSR, MH+ 1780.1375, m/z 594.0507  
 10HNE-1HSA-37Trypsin5-LTQ4.5994.5994.3.dta

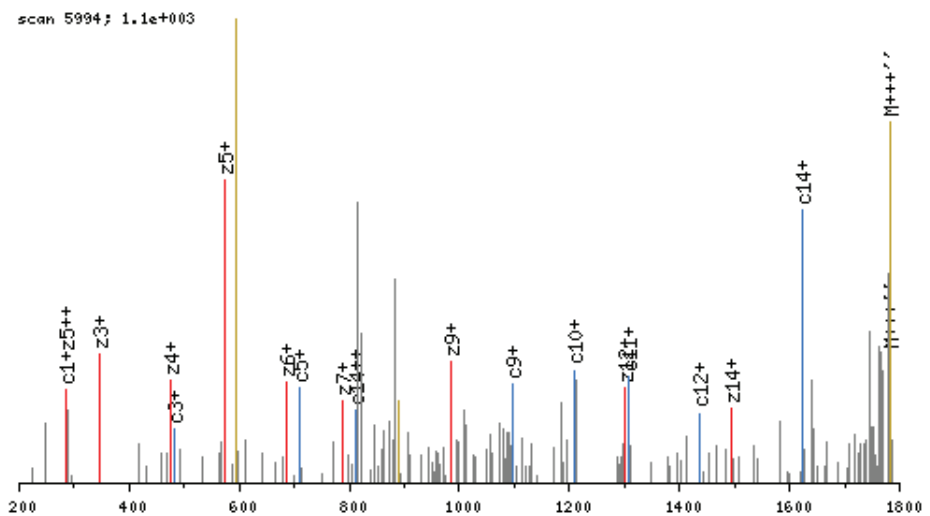

click image to zoom in; click top corners to zoom out [precursor±]

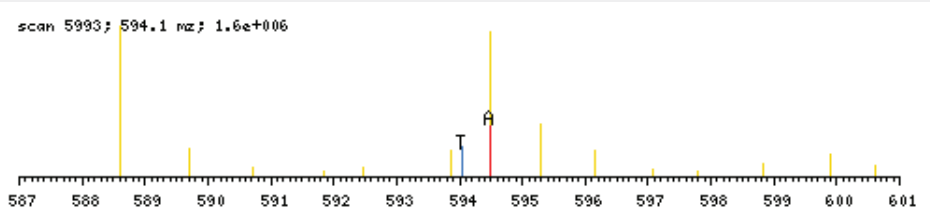

zoomed in precursor plot; T=theoretical m/z, A=acquired m/z

| c <sup>+</sup> | c <sup>2+</sup> | #  | AA | #  | z <sup>+</sup> | z <sup>2+</sup> | z <sup>3+</sup> |
|----------------|-----------------|----|----|----|----------------|-----------------|-----------------|
| 286.3286       | 143.6682        | 1  | K  | 15 |                |                 |                 |
| 385.3970       | 193.2024        | 2  | V  | 14 | 1495.8246      | 748.4162        | 499.2801        |
| 482.4498       | 241.7288        | 3  | P  | 13 | 1396.7562      | 698.8820        | 466.2573        |
| 610.5083       | 305.7581        | 4  | Q  | 12 | 1299.7034      | 650.3556        | 433.9064        |
| 709.5768       | 355.2923        | 5  | V  | 11 | 1171.6449      | 586.3263        | 391.2202        |
| 796.6088       | 398.8083        | 6  | S  | 10 | 1072.5764      | 536.7921        | 358.1974        |
| 897.6565       | 449.3321        | 7  | T  | 9  | 985.5444       | 493.2761        | 329.1867        |
| 994.7092       | 497.8585        | 8  | P  | 8  | 884.4967       | 442.7523        | 295.5041        |
| 1095.7569      | 548.3824        | 9  | T  | 7  | 787.4440       | 394.2259        | 263.1532        |
| 1208.8410      | 604.9244        | 10 | L  | 6  | 686.3963       | 343.7021        | 229.4706        |
| 1307.9094      | 654.4586        | 11 | V  | 5  | 573.3122       | 287.1600        | 191.7760        |
| 1436.9520      | 718.9799        | 12 | E  | 4  | 474.2438       | 237.6258        | 158.7532        |
| 1536.0204      | 768.5141        | 13 | V  | 3  | 345.2012       | 173.1045        | 115.7390        |
| 1623.0524      | 812.0301        | 14 | S  | 2  | 246.1328       | 123.5703        | 82.7162         |
|                |                 | 15 | R  | 1  | 159.1008       | 80.0543         | 53.7055         |

K(1) : +268.29

X-range: 200 - 1000  
 MassTol: Y-zoom: 0.950 1.00  
 ImageSize:  Sm  Lg  
 MassType:  AVG  MONO  
 Axis:  1  2  
 Label:  I  M  -  
 Ions: a  +  2+  3+  
 b  +  2+  3+  
 c  +  2+  3+  
 x  +  2+  3+  
 y  +  2+  3+  
 z  +  2+  3+  
 hide H<sub>2</sub>O/NH<sub>3</sub>   
 zoom 112-122   
 zoom 124-133   
 GO

VTKCCTESLVNR, MH+ 1625.1787, m/z 542.3977  
 10HNE-1HSA-37Trypsin2-LTQ3.3654.3654.3.dta

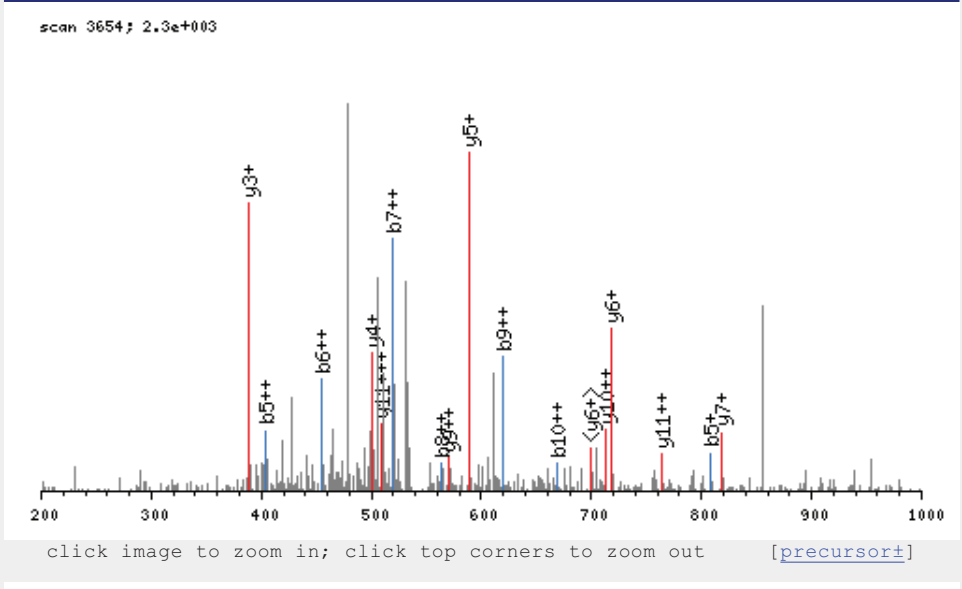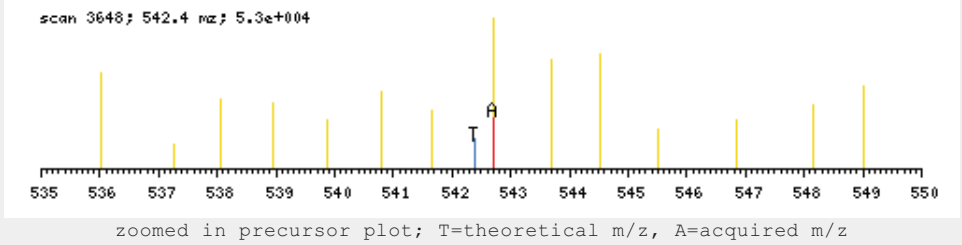

| b <sup>+</sup> | b <sup>2+</sup> | #  | AA | #  | y <sup>+</sup> | y <sup>2+</sup> | y <sup>3+</sup> |
|----------------|-----------------|----|----|----|----------------|-----------------|-----------------|
| 100.0762       | 50.5420         | 1  | V  | 12 |                |                 |                 |
| 201.1239       | 101.0659        | 2  | T  | 11 | 1526.1103      | 763.5590        | 509.3753        |
| 487.4287       | 244.2183        | 3  | K  | 10 | 1425.0626      | 713.0352        | 475.6927        |
| 647.5890       | 324.2984        | 4  | C  | 9  | 1138.7578      | 569.8828        | 380.2578        |
| 807.7493       | 404.3786        | 5  | C  | 8  | 978.5975       | 489.8027        | 326.8711        |
| 908.7970       | 454.9024        | 6  | T  | 7  | 818.4372       | 409.7225        | 273.4843        |
| 1037.8396      | 519.4237        | 7  | E  | 6  | 717.3895       | 359.1987        | 239.8017        |
| 1124.8716      | 562.9397        | 8  | S  | 5  | 588.3469       | 294.6774        | 196.7875        |
| 1237.9557      | 619.4817        | 9  | L  | 4  | 501.3149       | 251.1614        | 167.7769        |
| 1337.0241      | 669.0160        | 10 | V  | 3  | 388.2308       | 194.6193        | 130.0822        |
| 1451.0670      | 726.0374        | 11 | N  | 2  | 289.1624       | 145.0851        | 97.0594         |
|                |                 | 12 | R  | 1  | 175.1195       | 88.0637         | 59.0451         |

K(3):+286.30 C(4):+160.16 C(5):+160.16

X-range: 200 - 2000  
 MassTol: Y-zoom: 0.950 1.00  
 ImageSize:  Sm  Lg  
 MassType:  AVG  MONO  
 Axis:  1  2  
 Label:  I  M  -  
 Ions: a  +  2+  3+  
 b  +  2+  3+  
 c  +  2+  3+  
 x  +  2+  3+  
 y  +  2+  3+  
 z  +  2+  3+  
 hide H<sub>2</sub>O/NH<sub>3</sub>   
 zoom 112-122   
 zoom 124-133   
 GO

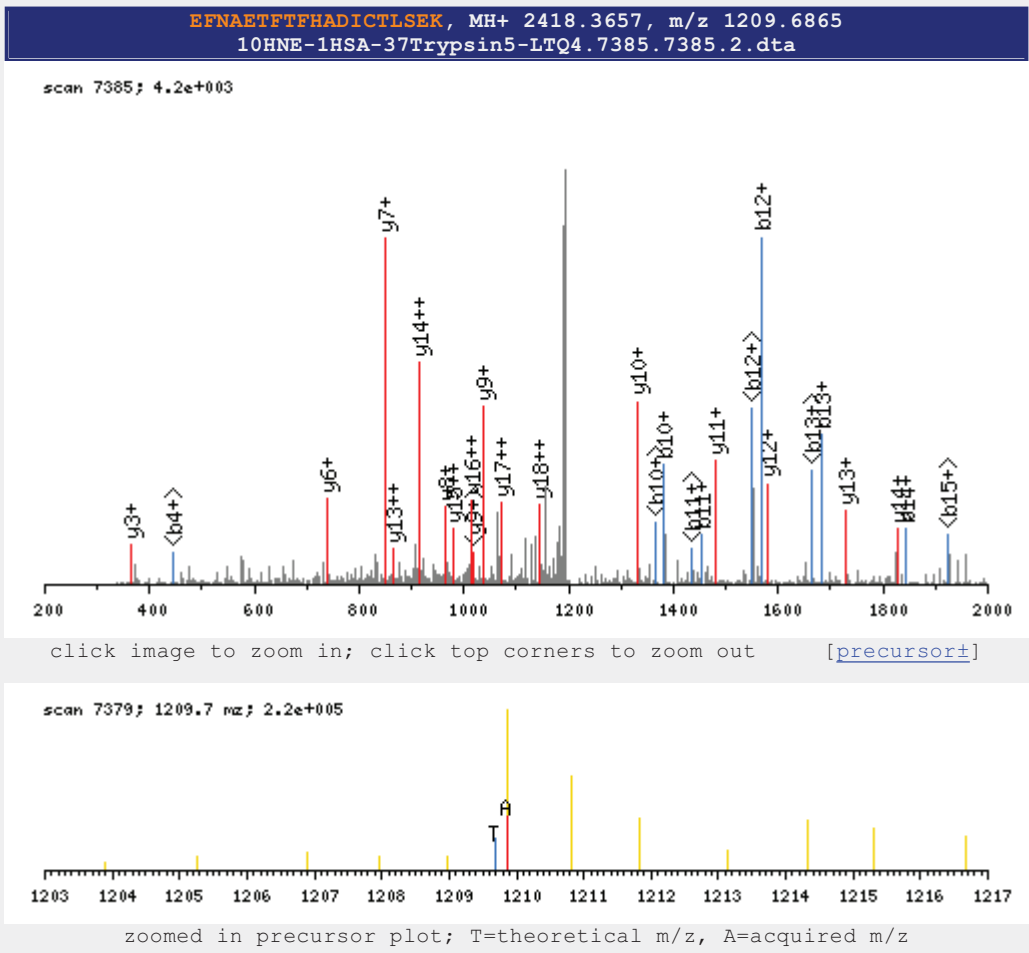

| b <sup>+</sup> | #  | AA | #  | y <sup>+</sup> | y <sup>2+</sup> |
|----------------|----|----|----|----------------|-----------------|
| 130.0504       | 1  | E  | 19 |                |                 |
| 277.1188       | 2  | F  | 18 | 2289.3232      | 1145.1655       |
| 391.1618       | 3  | N  | 17 | 2142.2547      | 1071.6313       |
| 462.1989       | 4  | A  | 16 | 2028.2118      | 1014.6098       |
| 591.2415       | 5  | E  | 15 | 1957.1747      | 979.0913        |
| 692.2891       | 6  | T  | 14 | 1828.1321      | 914.5700        |
| 839.3576       | 7  | F  | 13 | 1727.0844      | 864.0461        |
| 940.4052       | 8  | T  | 12 | 1580.0160      | 790.5119        |
| 1087.4737      | 9  | F  | 11 | 1478.9683      | 739.9881        |
| 1382.7454      | 10 | H  | 10 | 1331.8999      | 666.4539        |
| 1453.7825      | 11 | A  | 9  | 1036.6281      | 518.8180        |
| 1568.8095      | 12 | D  | 8  | 965.5910       | 483.2994        |
| 1681.8936      | 13 | I  | 7  | 850.5641       | 425.7860        |
| 1842.0539      | 14 | C  | 6  | 737.4800       | 369.2439        |
| 1943.1015      | 15 | T  | 5  | 577.3197       | 289.1638        |
| 2056.1856      | 16 | L  | 4  | 476.2720       | 238.6399        |
| 2143.2176      | 17 | S  | 3  | 363.1880       | 182.0979        |
| 2272.2602      | 18 | E  | 2  | 276.1559       | 138.5819        |
|                | 19 | K  | 1  | 147.1134       | 74.0606         |

H(10):+295.27 C(14):+160.16

X-range: 400 - 1800  
 MassTol: Y-zoom: 0.950 1.00  
 ImageSize:  Sm  Lg  
 MassType:  AVG  MONO  
 Axis:  1  2  
 Label:  I  M  -  
 Ions: a  +  2+  3+  
 b  +  2+  3+  
 c  +  2+  3+  
 x  +  2+  3+  
 y  +  2+  3+  
 z  +  2+  3+  
 hide H<sub>2</sub>O/NH<sub>3</sub>   
 zoom 112-122   
 zoom 124-133   
 GO

EFNAETTFHADICTLSEK, MH+ 2418.3657, m/z 806.7934  
 10HNE-1HSA-37Trypsin3-LTQ1.5945.5945.3.dta

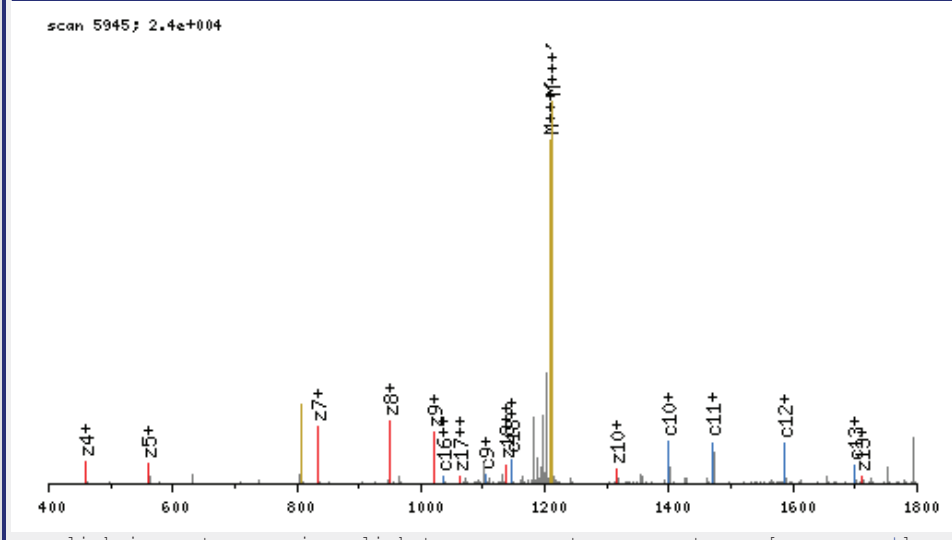

click image to zoom in; click top corners to zoom out [precursor±]

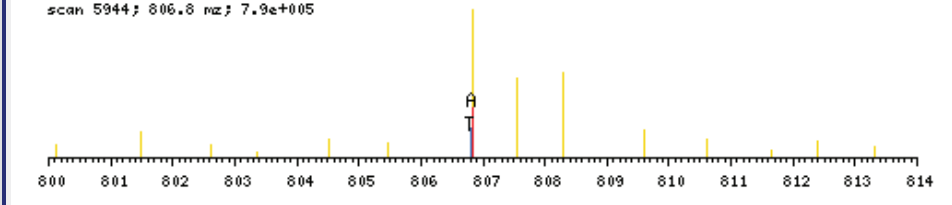

zoomed in precursor plot; T=theoretical m/z, A=acquired m/z

| c <sup>+</sup> | c <sup>2+</sup> | #  | AA | #  | z <sup>+</sup> | z <sup>2+</sup> | z <sup>3+</sup> |
|----------------|-----------------|----|----|----|----------------|-----------------|-----------------|
| 147.0770       | 74.0424         | 1  | E  | 19 |                |                 |                 |
| 294.1454       | 147.5766        | 2  | F  | 18 | 2273.3044      | 1137.1561       | 758.4400        |
| 408.1883       | 204.5981        | 3  | N  | 17 | 2126.2360      | 1063.6219       | 709.4172        |
| 479.2254       | 240.1166        | 4  | A  | 16 | 2012.1931      | 1006.6005       | 671.4029        |
| 608.2680       | 304.6379        | 5  | E  | 15 | 1941.1560      | 971.0819        | 647.7239        |
| 709.3157       | 355.1618        | 6  | T  | 14 | 1812.1134      | 906.5606        | 604.7097        |
| 856.3841       | 428.6960        | 7  | F  | 13 | 1711.0657      | 856.0368        | 571.0271        |
| 957.4318       | 479.2198        | 8  | T  | 12 | 1563.9973      | 782.5026        | 522.0043        |
| 1104.5002      | 552.7540        | 9  | F  | 11 | 1462.9496      | 731.9787        | 488.3218        |
| 1399.7720      | 700.3899        | 10 | H  | 10 | 1315.8812      | 658.4445        | 439.2989        |
| 1470.8091      | 735.9085        | 11 | A  | 9  | 1020.6094      | 510.8086        | 340.8750        |
| 1585.8360      | 793.4219        | 12 | D  | 8  | 949.5723       | 475.2901        | 317.1960        |
| 1698.9201      | 849.9640        | 13 | I  | 7  | 834.5454       | 417.7766        | 278.8537        |
| 1859.0804      | 930.0441        | 14 | C  | 6  | 721.4613       | 361.2346        | 241.1590        |
| 1960.1281      | 980.5680        | 15 | T  | 5  | 561.3010       | 281.1544        | 187.7722        |
| 2073.2121      | 1037.1100       | 16 | L  | 4  | 460.2533       | 230.6306        | 154.0897        |
| 2160.2442      | 1080.6260       | 17 | S  | 3  | 347.1693       | 174.0885        | 116.3950        |
| 2289.2868      | 1145.1473       | 18 | E  | 2  | 260.1372       | 130.5725        | 87.3843         |
|                |                 | 19 | K  | 1  | 131.0946       | 66.0512         | 44.3701         |

H(10):+295.27 C(14):+160.16

X-range: 300 - 1500  
 MassTol: Y-zoom: 0.950 1.00  
 ImageSize: Sm Lg  
 MassType: AVG MONO  
 Axis: 1 2  
 Label: I M -  
 Ions: a + 2+ 3+ b + 2+ 3+ c + 2+ 3+ x + 2+ 3+ y + 2+ 3+ z + 2+ 3+  
 hide H<sub>2</sub>O/NH<sub>3</sub>  
 zoom 112-122  
 zoom 124-133  
 GO

EFNAETTFPHADICTLSEKER, MH+ 2703.5064, m/z 901.8403  
 10HNE-1HSA-37Trypsin5-LTQ1.5376.5376.3.dta

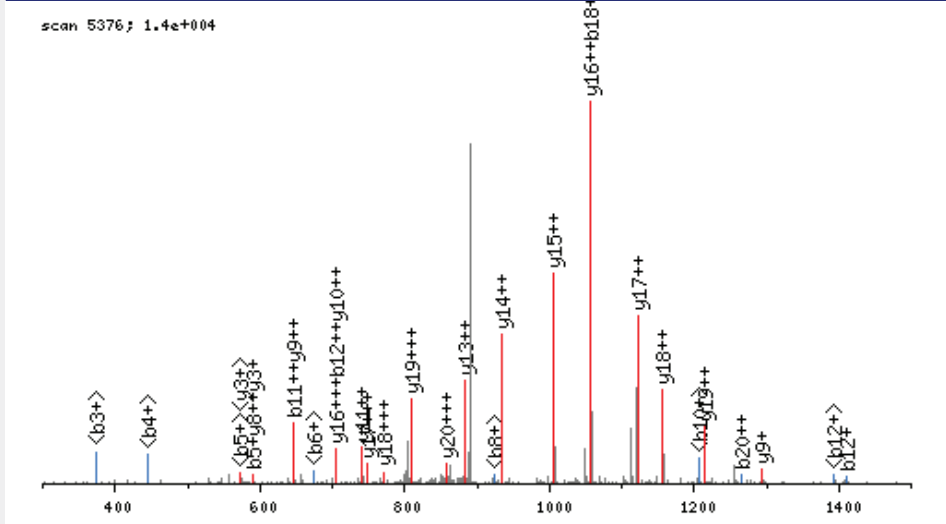

click image to zoom in; click top corners to zoom out [precursor±]

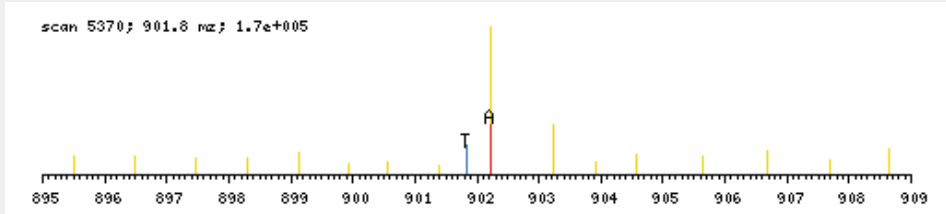

zoomed in precursor plot; T=theoretical m/z, A=acquired m/z

| b <sup>+</sup> | b <sup>2+</sup> | #  | AA | #  | y <sup>+</sup> | y <sup>2+</sup> | y <sup>3+</sup> |
|----------------|-----------------|----|----|----|----------------|-----------------|-----------------|
| 130.0504       | 65.5291         | 1  | E  | 21 |                |                 |                 |
| 277.1188       | 139.0633        | 2  | F  | 20 | 2574.4638      | 1287.7358       | 858.8265        |
| 391.1618       | 196.0848        | 3  | N  | 19 | 2427.3954      | 1214.2016       | 809.8037        |
| 462.1989       | 231.6033        | 4  | A  | 18 | 2313.3525      | 1157.1801       | 771.7894        |
| 591.2415       | 296.1246        | 5  | E  | 17 | 2242.3153      | 1121.6616       | 748.1103        |
| 692.2891       | 346.6485        | 6  | T  | 16 | 2113.2728      | 1057.1403       | 705.0961        |
| 839.3576       | 420.1827        | 7  | F  | 15 | 2012.2251      | 1006.6165       | 671.4136        |
| 940.4052       | 470.7065        | 8  | T  | 14 | 1865.1567      | 933.0822        | 622.3908        |
| 1087.4737      | 544.2407        | 9  | F  | 13 | 1764.1090      | 882.5584        | 588.7082        |
| 1224.5326      | 612.7702        | 10 | H  | 12 | 1617.0406      | 809.0242        | 539.6854        |
| 1295.5697      | 648.2888        | 11 | A  | 11 | 1479.9817      | 740.4947        | 493.9991        |
| 1410.5966      | 705.8022        | 12 | D  | 10 | 1408.9445      | 704.9762        | 470.3201        |
| 1523.6807      | 762.3443        | 13 | I  | 9  | 1293.9176      | 647.4627        | 431.9778        |
| 1683.8410      | 842.4244        | 14 | C  | 8  | 1180.8335      | 590.9207        | 394.2831        |
| 1784.8887      | 892.9482        | 15 | T  | 7  | 1020.6732      | 510.8405        | 340.8963        |
| 1897.9727      | 949.4903        | 16 | L  | 6  | 919.6256       | 460.3167        | 307.2137        |
| 1985.0048      | 993.0063        | 17 | S  | 5  | 806.5415       | 403.7747        | 269.5190        |
| 2114.0473      | 1057.5276       | 18 | E  | 4  | 719.5095       | 360.2586        | 240.5084        |
| 2400.3521      | 1200.6800       | 19 | K  | 3  | 590.4669       | 295.7373        | 197.4942        |
| 2529.3947      | 1265.2013       | 20 | E  | 2  | 304.1621       | 152.5850        | 102.0592        |
|                |                 | 21 | R  | 1  | 175.1195       | 88.0637         | 59.0451         |

C(14):+160.16 K(19):+286.30

X-range: 500 - 1300  
 MassTol: Y-zoom: 0.950 1.00  
 ImageSize:  Sm  Lg  
 MassType:  AVG  MONO  
 Axis:  1  2  
 Label:  I  M  -  
 Ions: a  +  2+  3+  
 b  +  2+  3+  
 c  +  2+  3+  
 x  +  2+  3+  
 y  +  2+  3+  
 z  +  2+  3+  
 hide H<sub>2</sub>O/NH<sub>3</sub>   
 zoom 112-122   
 zoom 124-133   
 GO

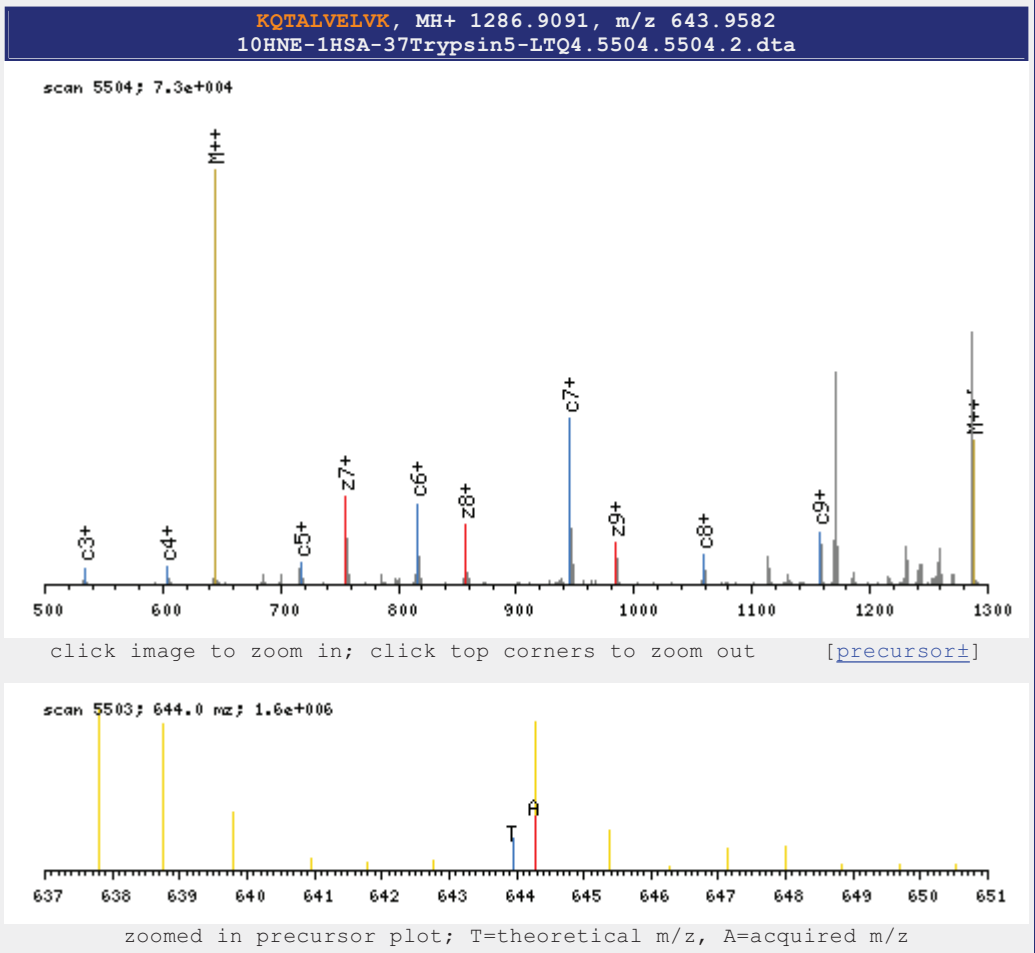

| c <sup>+</sup> | #  | AA | #  | z <sup>+</sup> | z <sup>2+</sup> |
|----------------|----|----|----|----------------|-----------------|
| 304.3392       | 1  | K  | 10 |                |                 |
| 432.3977       | 2  | Q  | 9  | 984.5855       | 492.7967        |
| 533.4454       | 3  | T  | 8  | 856.5270       | 428.7674        |
| 604.4825       | 4  | A  | 7  | 755.4793       | 378.2436        |
| 717.5666       | 5  | L  | 6  | 684.4422       | 342.7250        |
| 816.6350       | 6  | V  | 5  | 571.3581       | 286.1830        |
| 945.6776       | 7  | E  | 4  | 472.2897       | 236.6488        |
| 1058.7617      | 8  | L  | 3  | 343.2471       | 172.1275        |
| 1157.8301      | 9  | V  | 2  | 230.1630       | 115.5854        |
|                | 10 | K  | 1  | 131.0946       | 66.0512         |

K(1) : +286.30



X-range:

100 - 800

MassTol: Y-zoom:

0.950 1.00

ImageSize:

Sm  Lg

MassType:

AVG  MONO

Axis:

1  2

Label:

I  M  -

Ions:

a  +  2+  3+

b  +  2+  3+

c  +  2+  3+

x  +  2+  3+

y  +  2+  3+

z  +  2+  3+

hide H<sub>2</sub>O/NH<sub>3</sub>

zoom 112-122

zoom 124-133

GO

KQTALVELVK, MH+ 1268.8985, m/z 423.6377  
10HNE-1HSA-37Trypsin4-LTQ3.5169.5169.3.dta

scan 5169; 1.6e+004

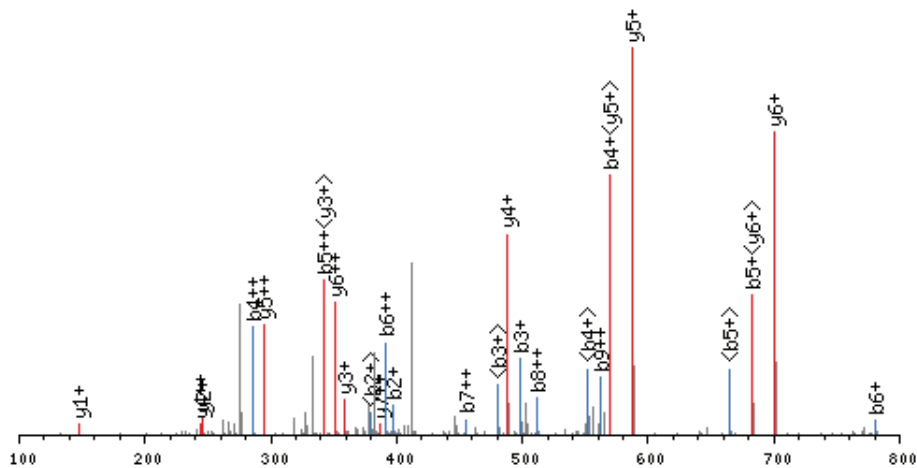

click image to zoom in; click top corners to zoom out [precursor±]

scan 5167; 423.6 m/z; 1.3e+006

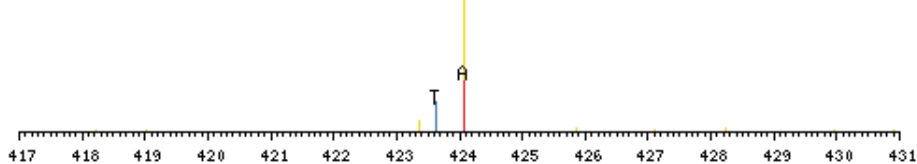

zoomed in precursor plot; T=theoretical m/z, A=acquired m/z

| b <sup>+</sup> | b <sup>2+</sup> | #  | AA | #  | y <sup>+</sup> | y <sup>2+</sup> | y <sup>3+</sup> |
|----------------|-----------------|----|----|----|----------------|-----------------|-----------------|
| 269.3020       | 135.1549        | 1  | K  | 10 |                |                 |                 |
| 397.3606       | 199.1842        | 2  | Q  | 9  | 1000.6043      | 500.8060        | 334.2066        |
| 498.4083       | 249.7081        | 3  | T  | 8  | 872.5457       | 436.7768        | 291.5204        |
| 569.4454       | 285.2266        | 4  | A  | 7  | 771.4980       | 386.2529        | 257.8379        |
| 682.5295       | 341.7686        | 5  | L  | 6  | 700.4609       | 350.7344        | 234.1589        |
| 781.5979       | 391.3029        | 6  | V  | 5  | 587.3768       | 294.1923        | 196.4642        |
| 910.6405       | 455.8242        | 7  | E  | 4  | 488.3084       | 244.6581        | 163.4414        |
| 1023.7245      | 512.3662        | 8  | L  | 3  | 359.2658       | 180.1368        | 120.4272        |
| 1122.7930      | 561.9004        | 9  | V  | 2  | 246.1818       | 123.5948        | 82.7325         |
|                |                 | 10 | K  | 1  | 147.1134       | 74.0606         | 49.7097         |

K(1) : +268.29

X-range: 200 - 1300  
 MassTol: Y-zoom: 0.950 1.00  
 ImageSize:  Sm  Lg  
 MassType:  AVG  MONO  
 Axis:  1  2  
 Label:  I  M  -  
 Ions: a  +  2+  3+  
 b  +  2+  3+  
 c  +  2+  3+  
 x  +  2+  3+  
 y  +  2+  3+  
 z  +  2+  3+  
 hide H<sub>2</sub>O/NH<sub>3</sub>   
 zoom 112-122   
 zoom 124-133   
 GO

KOTALVELVK, MH+ 1268.8985, m/z 423.6377  
 10HNE-1HSA-37Trypsin3-LTQ3.4934.4934.3.dta

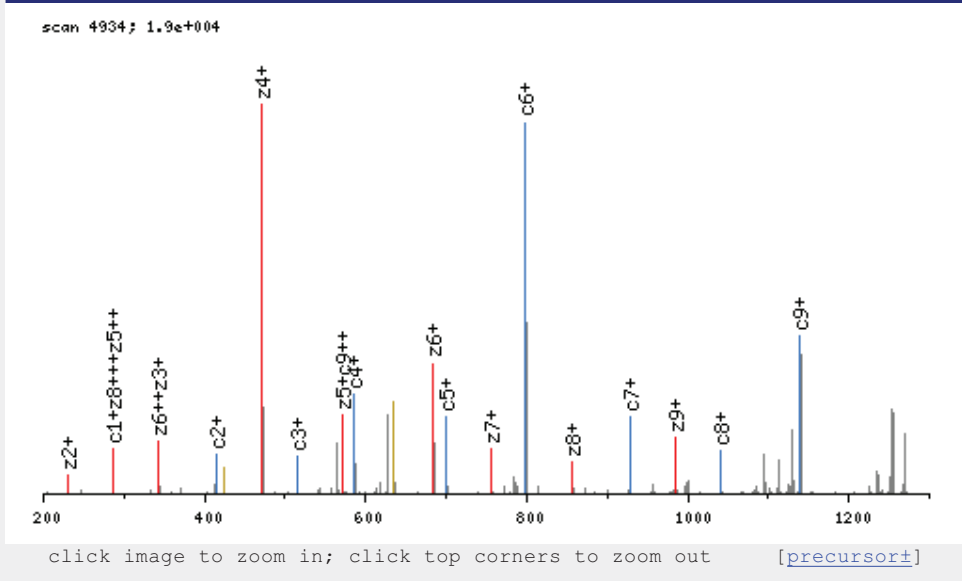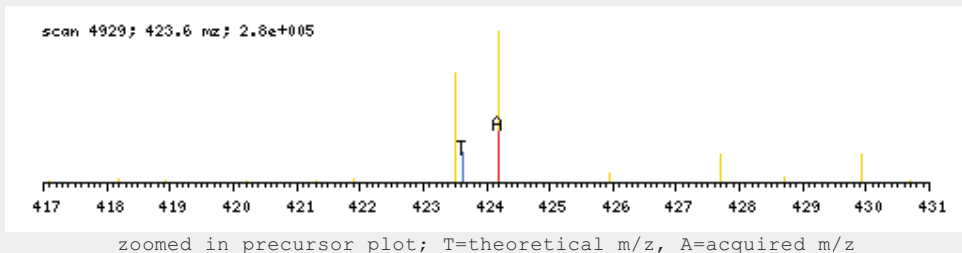

| c <sup>+</sup> | c <sup>2+</sup> | #  | AA | #  | z <sup>+</sup> | z <sup>2+</sup> | z <sup>3+</sup> |
|----------------|-----------------|----|----|----|----------------|-----------------|-----------------|
| 286.3286       | 143.6682        | 1  | K  | 10 |                |                 |                 |
| 414.3872       | 207.6975        | 2  | Q  | 9  | 984.5855       | 492.7967        | 328.8671        |
| 515.4348       | 258.2213        | 3  | T  | 8  | 856.5270       | 428.7674        | 286.1809        |
| 586.4720       | 293.7399        | 4  | A  | 7  | 755.4793       | 378.2436        | 252.4983        |
| 699.5560       | 350.2819        | 5  | L  | 6  | 684.4422       | 342.7250        | 228.8193        |
| 798.6244       | 399.8161        | 6  | V  | 5  | 571.3581       | 286.1830        | 191.1246        |
| 927.6670       | 464.3374        | 7  | E  | 4  | 472.2897       | 236.6488        | 158.1018        |
| 1040.7511      | 520.8795        | 8  | L  | 3  | 343.2471       | 172.1275        | 115.0876        |
| 1139.8195      | 570.4137        | 9  | V  | 2  | 230.1630       | 115.5854        | 77.3929         |
|                |                 | 10 | K  | 1  | 131.0946       | 66.0512         | 44.3701         |

K(1): +268.29

X-range:  -

MassTol: Y-zoom:

ImageSize:  Sm  Lg

MassType:  AVG  MONO

Axis:  1  2

Label:  I  M  -

Ions: a  +  2+  3+  
 b  +  2+  3+  
 c  +  2+  3+  
 x  +  2+  3+  
 y  +  2+  3+  
 z  +  2+  3+

hide H<sub>2</sub>O/NH<sub>3</sub>

zoom 112-122

zoom 124-133

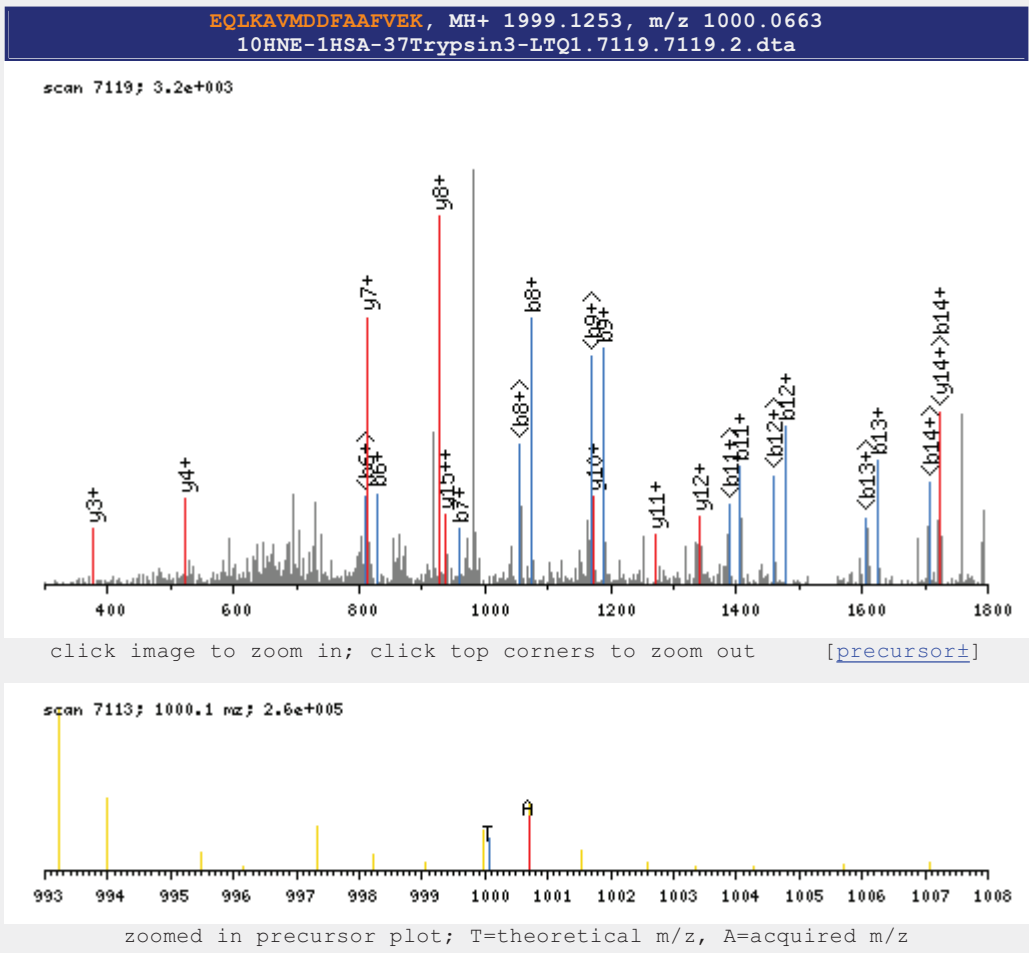

| b <sup>+</sup> | #  | AA | #  | y <sup>+</sup> | y <sup>2+</sup> |
|----------------|----|----|----|----------------|-----------------|
| 130.0504       | 1  | E  | 16 |                |                 |
| 258.1090       | 2  | Q  | 15 | 1870.0827      | 935.5453        |
| 371.1931       | 3  | L  | 14 | 1742.0242      | 871.5160        |
| 657.4978       | 4  | K  | 13 | 1628.9401      | 814.9740        |
| 728.5350       | 5  | A  | 12 | 1342.6353      | 671.8216        |
| 827.6034       | 6  | V  | 11 | 1271.5982      | 636.3030        |
| 958.6439       | 7  | M  | 10 | 1172.5298      | 586.7688        |
| 1073.6708      | 8  | D  | 9  | 1041.4893      | 521.2486        |
| 1188.6977      | 9  | D  | 8  | 926.4624       | 463.7351        |
| 1335.7662      | 10 | F  | 7  | 811.4354       | 406.2216        |
| 1406.8033      | 11 | A  | 6  | 664.3670       | 332.6874        |
| 1477.8404      | 12 | A  | 5  | 593.3299       | 297.1689        |
| 1624.9088      | 13 | F  | 4  | 522.2928       | 261.6503        |
| 1723.9772      | 14 | V  | 3  | 375.2244       | 188.1161        |
| 1853.0198      | 15 | E  | 2  | 276.1559       | 138.5819        |
|                | 16 | K  | 1  | 147.1134       | 74.0606         |

K(4):+286.30

X-range: 400 - 1900  
 MassTol: 0.950 Y-zoom: 1.00  
 ImageSize: Sm Lg  
 MassType: AVG MONO  
 Axis: 1 2  
 Label: I M -  
 Ions: a + 2+ 3+ b + 2+ 3+ c  +  2+  3+ x + 2+ 3+ y + 2+ 3+ z  +  2+  3+  
 hide H<sub>2</sub>O/NH<sub>3</sub>   
 zoom 112-122   
 zoom 124-133   
 GO

EQLKAVMDDFAAFVEK, MH+ 1999.1253, m/z 667.0466  
 10HNE-1HSA-37Trypsin5-LTQ4.8836.8836.3.dta

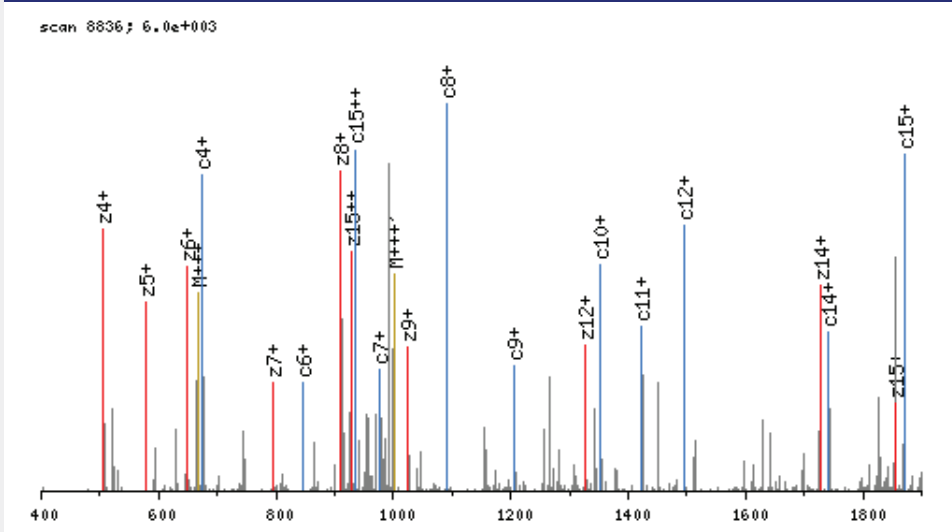

click image to zoom in; click top corners to zoom out [precursor±]

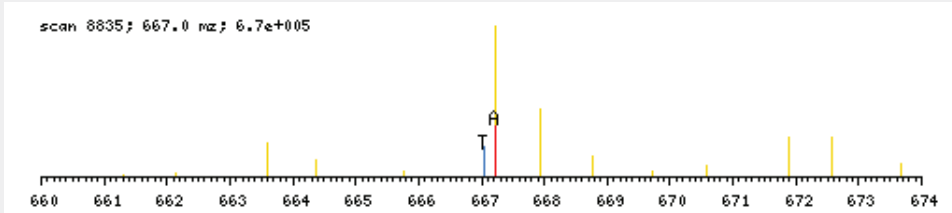

zoomed in precursor plot; T=theoretical m/z, A=acquired m/z

| c <sup>+</sup> | c <sup>2+</sup> | #  | AA | #  | z <sup>+</sup> | z <sup>2+</sup> | z <sup>3+</sup> |
|----------------|-----------------|----|----|----|----------------|-----------------|-----------------|
| 147.0770       | 74.0424         | 1  | E  | 16 |                |                 |                 |
| 275.1355       | 138.0717        | 2  | Q  | 15 | 1854.0640      | 927.5359        | 618.6932        |
| 388.2196       | 194.6137        | 3  | L  | 14 | 1726.0054      | 863.5066        | 576.0070        |
| 674.5244       | 337.7661        | 4  | K  | 13 | 1612.9214      | 806.9646        | 538.3123        |
| 745.5615       | 373.2847        | 5  | A  | 12 | 1326.6166      | 663.8122        | 442.8774        |
| 844.6299       | 422.8189        | 6  | V  | 11 | 1255.5795      | 628.2937        | 419.1984        |
| 975.6704       | 488.3391        | 7  | M  | 10 | 1156.5111      | 578.7594        | 386.1756        |
| 1090.6973      | 545.8526        | 8  | D  | 9  | 1025.4706      | 513.2392        | 342.4954        |
| 1205.7243      | 603.3661        | 9  | D  | 8  | 910.4436       | 455.7257        | 304.1531        |
| 1352.7927      | 676.9003        | 10 | F  | 7  | 795.4167       | 398.2123        | 265.8108        |
| 1423.8298      | 712.4188        | 11 | A  | 6  | 648.3483       | 324.6781        | 216.7880        |
| 1494.8669      | 747.9374        | 12 | A  | 5  | 577.3112       | 289.1595        | 193.1089        |
| 1641.9353      | 821.4716        | 13 | F  | 4  | 506.2740       | 253.6409        | 169.4299        |
| 1741.0038      | 871.0058        | 14 | V  | 3  | 359.2056       | 180.1067        | 120.4071        |
| 1870.0463      | 935.5271        | 15 | E  | 2  | 260.1372       | 130.5725        | 87.3843         |
|                |                 | 16 | K  | 1  | 131.0946       | 66.0512         | 44.3701         |

K(4) : +286.30

X-range: 200 - 1300  
 MassTol: Y-zoom: 0.950 1.00  
 ImageSize:  Sm  Lg  
 MassType:  AVG  MONO  
 Axis:  1  2  
 Label:  I  M  -  
 Ions: a  +  2+  3+  
 b  +  2+  3+  
 c  +  2+  3+  
 x  +  2+  3+  
 y  +  2+  3+  
 z  +  2+  3+  
 hide H<sub>2</sub>O/NH<sub>3</sub>   
 zoom 112-122   
 zoom 124-133   
 GO

EQLKAVMDDFAAFVEK, MH+ 1981.1148, m/z 661.0431  
 10HNE-1HSA-37Trypsin3-LTQ2.7320.7320.3.dta

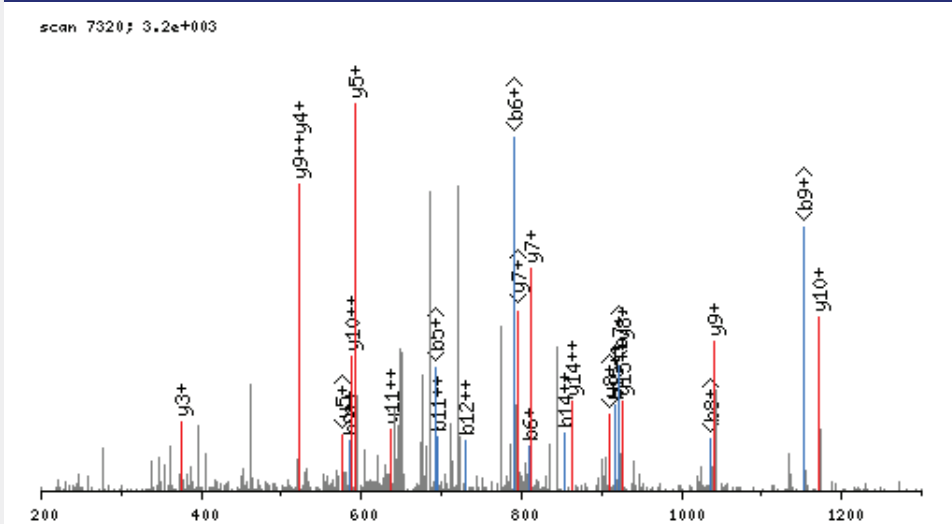

click image to zoom in; click top corners to zoom out [precursor±]

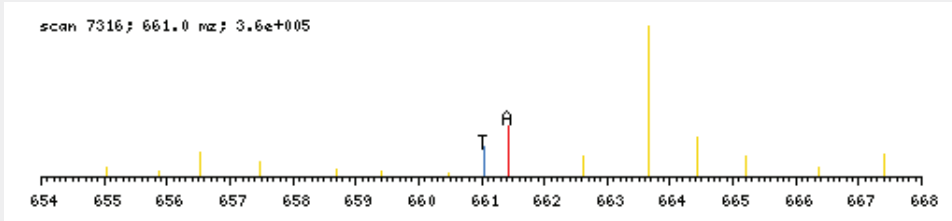

zoomed in precursor plot; T=theoretical m/z, A=acquired m/z

| b <sup>+</sup> | b <sup>2+</sup> | #  | AA | #  | y <sup>+</sup> | y <sup>2+</sup> | y <sup>3+</sup> |
|----------------|-----------------|----|----|----|----------------|-----------------|-----------------|
| 130.0504       | 65.5291         | 1  | E  | 16 |                |                 |                 |
| 258.1090       | 129.5584        | 2  | Q  | 15 | 1852.0722      | 926.5400        | 618.0293        |
| 371.1931       | 186.1004        | 3  | L  | 14 | 1724.0136      | 862.5107        | 575.3431        |
| 639.4873       | 320.2475        | 4  | K  | 13 | 1610.9295      | 805.9687        | 537.6484        |
| 710.5244       | 355.7661        | 5  | A  | 12 | 1342.6353      | 671.8216        | 448.2170        |
| 809.5928       | 405.3003        | 6  | V  | 11 | 1271.5982      | 636.3030        | 424.5380        |
| 940.6333       | 470.8206        | 7  | M  | 10 | 1172.5298      | 586.7688        | 391.5151        |
| 1055.6602      | 528.3340        | 8  | D  | 9  | 1041.4893      | 521.2486        | 347.8350        |
| 1170.6872      | 585.8475        | 9  | D  | 8  | 926.4624       | 463.7351        | 309.4927        |
| 1317.7556      | 659.3817        | 10 | F  | 7  | 811.4354       | 406.2216        | 271.1504        |
| 1388.7927      | 694.9003        | 11 | A  | 6  | 664.3670       | 332.6874        | 222.1276        |
| 1459.8298      | 730.4188        | 12 | A  | 5  | 593.3299       | 297.1689        | 198.4485        |
| 1606.8982      | 803.9530        | 13 | F  | 4  | 522.2928       | 261.6503        | 174.7695        |
| 1705.9666      | 853.4872        | 14 | V  | 3  | 375.2244       | 188.1161        | 125.7467        |
| 1835.0092      | 918.0085        | 15 | E  | 2  | 276.1559       | 138.5819        | 92.7239         |
|                |                 | 16 | K  | 1  | 147.1134       | 74.0606         | 49.7097         |

K(4):+268.29

X-range: 400 - 1800  
 MassTol: Y-zoom: 0.950 1.00  
 ImageSize:  Sm  Lg  
 MassType:  AVG  MONO  
 Axis:  1  2  
 Label:  I  M  -  
 Ions: a  +  2+  3+  
 b  +  2+  3+  
 c  +  2+  3+  
 x  +  2+  3+  
 y  +  2+  3+  
 z  +  2+  3+  
 hide H<sub>2</sub>O/NH<sub>3</sub>   
 zoom 112-122   
 zoom 124-133   
 GO

EQLKAVMDDFAAFVEK, MH+ 1981.1148, m/z 661.0431  
 10HNE-1HSA-37Trypsin2-LTQ1.7146.7146.3.dta

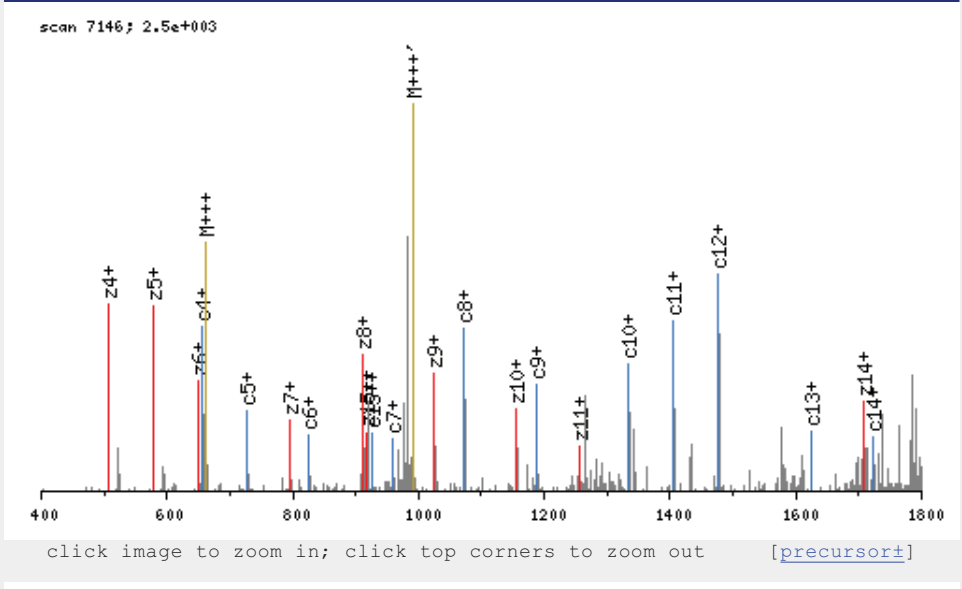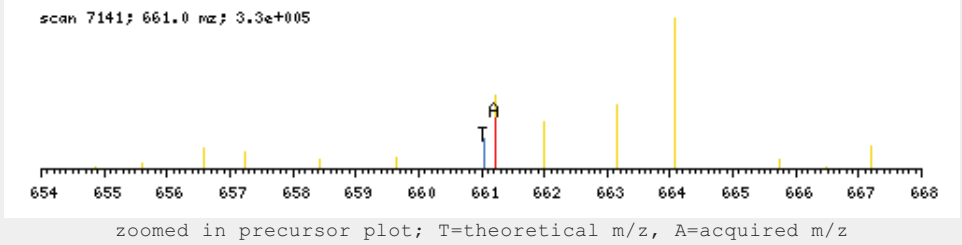

| c <sup>+</sup> | c <sup>2+</sup> | #  | AA | #  | z <sup>+</sup> | z <sup>2+</sup> | z <sup>3+</sup> |
|----------------|-----------------|----|----|----|----------------|-----------------|-----------------|
| 147.0770       | 74.0424         | 1  | E  | 16 |                |                 |                 |
| 275.1355       | 138.0717        | 2  | Q  | 15 | 1836.0534      | 918.5306        | 612.6897        |
| 388.2196       | 194.6137        | 3  | L  | 14 | 1707.9949      | 854.5013        | 570.0035        |
| 656.5138       | 328.7608        | 4  | K  | 13 | 1594.9108      | 797.9593        | 532.3088        |
| 727.5509       | 364.2794        | 5  | A  | 12 | 1326.6166      | 663.8122        | 442.8774        |
| 826.6194       | 413.8136        | 6  | V  | 11 | 1255.5795      | 628.2937        | 419.1984        |
| 957.6598       | 479.3338        | 7  | M  | 10 | 1156.5111      | 578.7594        | 386.1756        |
| 1072.6868      | 536.8473        | 8  | D  | 9  | 1025.4706      | 513.2392        | 342.4954        |
| 1187.7137      | 594.3608        | 9  | D  | 8  | 910.4436       | 455.7257        | 304.1531        |
| 1334.7821      | 667.8950        | 10 | F  | 7  | 795.4167       | 398.2123        | 265.8108        |
| 1405.8193      | 703.4135        | 11 | A  | 6  | 648.3483       | 324.6781        | 216.7880        |
| 1476.8564      | 738.9321        | 12 | A  | 5  | 577.3112       | 289.1595        | 193.1089        |
| 1623.9248      | 812.4663        | 13 | F  | 4  | 506.2740       | 253.6409        | 169.4299        |
| 1722.9932      | 862.0005        | 14 | V  | 3  | 359.2056       | 180.1067        | 120.4071        |
| 1852.0358      | 926.5218        | 15 | E  | 2  | 260.1372       | 130.5725        | 87.3843         |
|                |                 | 16 | K  | 1  | 131.0946       | 66.0512         | 44.3701         |

K(4):+268.29

X-range: 500 - 1400  
 MassTol: 0.950 Y-zoom: 1.00  
 ImageSize:  Sm  Ig  
 MassType:  AVG  MONO  
 Axis:  1  2  
 Label:  I  M  -  
 Ions: a  +  2+  3+  
 b  +  2+  3+  
 c  +  2+  3+  
 x  +  2+  3+  
 y  +  2+  3+  
 z  +  2+  3+  
 hide H<sub>2</sub>O/NH<sub>3</sub>   
 zoom 112-122   
 zoom 124-133   
 GO

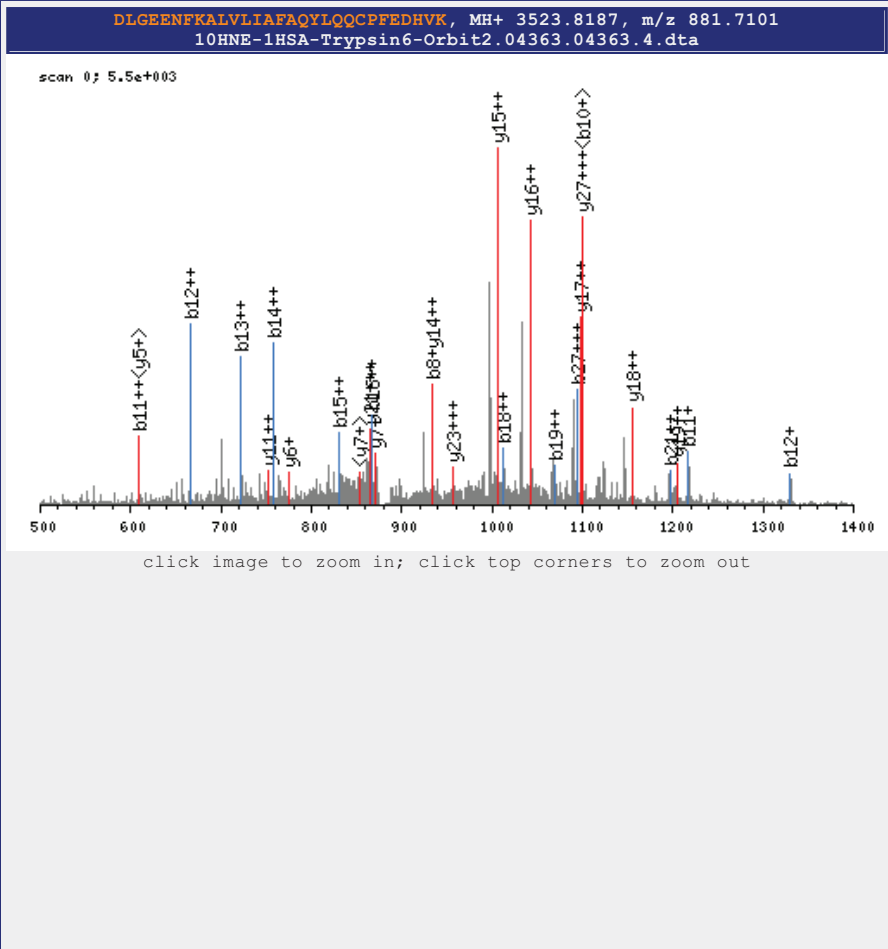

| b <sup>+</sup> | b <sup>2+</sup> | b <sup>3+</sup> | #  | AA | #  | y <sup>+</sup> | y <sup>2+</sup> | y <sup>3+</sup> |
|----------------|-----------------|-----------------|----|----|----|----------------|-----------------|-----------------|
| 116.0348       | 58.5213         | 39.3501         | 1  | D  | 29 |                |                 |                 |
| 229.1188       | 115.0633        | 77.0448         | 2  | L  | 28 | 3408.7918      | 1704.8998       | 1136.9358       |
| 286.1403       | 143.5741        | 96.0520         | 3  | G  | 27 | 3295.7077      | 1648.3578       | 1099.2411       |
| 415.1829       | 208.0954        | 139.0662        | 4  | E  | 26 | 3238.6863      | 1619.8470       | 1080.2340       |
| 544.2255       | 272.6167        | 182.0804        | 5  | E  | 25 | 3109.6437      | 1555.3258       | 1037.2198       |
| 658.2684       | 329.6381        | 220.0947        | 6  | N  | 24 | 2980.6011      | 1490.8045       | 994.2056        |
| 805.3368       | 403.1723        | 269.1175        | 7  | F  | 23 | 2866.5582      | 1433.7830       | 956.1913        |
| 933.4318       | 467.2198        | 311.8158        | 8  | K  | 22 | 2719.4897      | 1360.2488       | 907.1685        |
| 1004.4689      | 502.7384        | 335.4949        | 9  | A  | 21 | 2591.3948      | 1296.2013       | 864.4701        |
| 1117.5530      | 559.2804        | 373.1895        | 10 | L  | 20 | 2520.3577      | 1260.6827       | 840.7911        |
| 1216.6214      | 608.8146        | 406.2123        | 11 | V  | 19 | 2407.2736      | 1204.1407       | 803.0964        |
| 1329.7054      | 665.3566        | 443.9070        | 12 | L  | 18 | 2308.2052      | 1154.6065       | 770.0736        |
| 1442.7895      | 721.8987        | 481.6017        | 13 | I  | 17 | 2195.1211      | 1098.0645       | 732.3789        |
| 1513.8266      | 757.4172        | 505.2808        | 14 | A  | 16 | 2082.0371      | 1041.5224       | 694.6842        |
| 1660.8950      | 830.9514        | 554.3036        | 15 | F  | 15 | 2010.9999      | 1006.0039       | 671.0052        |
| 1731.9321      | 866.4700        | 577.9826        | 16 | A  | 14 | 1863.9315      | 932.4697        | 621.9824        |
| 1859.9907      | 930.4993        | 620.6688        | 17 | Q  | 13 | 1792.8944      | 896.9511        | 598.3034        |
| 2023.0541      | 1012.0309       | 675.0232        | 18 | Y  | 12 | 1664.8358      | 832.9218        | 555.6172        |
| 2136.1381      | 1068.5730       | 712.7179        | 19 | L  | 11 | 1501.7725      | 751.3902        | 501.2627        |
| 2264.1967      | 1132.6023       | 755.4041        | 20 | Q  | 10 | 1388.6884      | 694.8481        | 463.5680        |
| 2392.2553      | 1196.6315       | 798.0903        | 21 | Q  | 9  | 1260.6299      | 630.8188        | 420.8818        |
| 2653.3952      | 1327.2015       | 885.1369        | 22 | C  | 8  | 1132.5713      | 566.7896        | 378.1956        |
| 2750.4479      | 1375.7279       | 917.4879        | 23 | P  | 7  | 871.4314       | 436.2196        | 291.1490        |
| 2897.5164      | 1449.2621       | 966.5107        | 24 | F  | 6  | 774.3786       | 387.6932        | 258.7981        |
| 3026.5589      | 1513.7834       | 1009.5249       | 25 | E  | 5  | 627.3102       | 314.1590        | 209.7753        |
| 3141.5859      | 1571.2969       | 1047.8672       | 26 | D  | 4  | 498.2676       | 249.6377        | 166.7611        |
| 3278.6448      | 1639.8263       | 1093.5535       | 27 | H  | 3  | 383.2407       | 192.1243        | 128.4188        |
| 3377.7132      | 1689.3605       | 1126.5763       | 28 | V  | 2  | 246.1818       | 123.5948        | 82.7325         |
|                |                 |                 | 29 | K  | 1  | 147.1134       | 74.0606         | 49.7097         |

C (22) :+261.14

X-range: 200 - 1200  
 MassTol: Y-zoom: 0.950 1.00  
 ImageSize:  Sm  Lg  
 MassType:  AVG  MONO  
 Axis:  1  2  
 Label:  I  M  -  
 Ions: a  +  2+  3+  
 b  +  2+  3+  
 c  +  2+  3+  
 x  +  2+  3+  
 y  +  2+  3+  
 z  +  2+  3+  
 hide H<sub>2</sub>O/NH<sub>3</sub>   
 zoom 112-122   
 zoom 124-133   
 GO

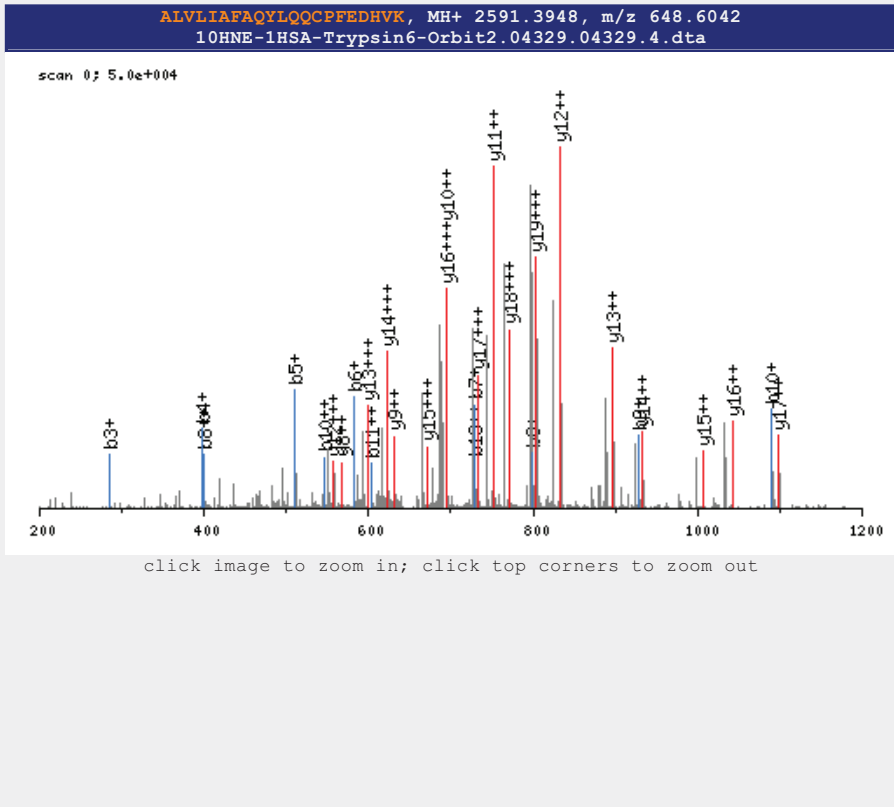

| b <sup>+</sup> | b <sup>2+</sup> | b <sup>3+</sup> | #  | AA | #  | y <sup>+</sup> | y <sup>2+</sup> | y <sup>3+</sup> |
|----------------|-----------------|-----------------|----|----|----|----------------|-----------------|-----------------|
| 72.0449        | 36.5264         | 24.6869         | 1  | A  | 21 |                |                 |                 |
| 185.1290       | 93.0684         | 62.3816         | 2  | L  | 20 | 2520.3577      | 1260.6827       | 840.7911        |
| 284.1974       | 142.6026        | 95.4044         | 3  | V  | 19 | 2407.2736      | 1204.1407       | 803.0964        |
| 397.2815       | 199.1447        | 133.0990        | 4  | L  | 18 | 2308.2052      | 1154.6065       | 770.0736        |
| 510.3655       | 255.6867        | 170.7937        | 5  | I  | 17 | 2195.1211      | 1098.0645       | 732.3789        |
| 581.4027       | 291.2052        | 194.4728        | 6  | A  | 16 | 2082.0371      | 1041.5224       | 694.6842        |
| 728.4711       | 364.7394        | 243.4956        | 7  | F  | 15 | 2010.9999      | 1006.0039       | 671.0052        |
| 799.5082       | 400.2580        | 267.1746        | 8  | A  | 14 | 1863.9315      | 932.4697        | 621.9824        |
| 927.5668       | 464.2873        | 309.8608        | 9  | Q  | 13 | 1792.8944      | 896.9511        | 598.3034        |
| 1090.6301      | 545.8190        | 364.2152        | 10 | Y  | 12 | 1664.8358      | 832.9218        | 555.6172        |
| 1203.7142      | 602.3610        | 401.9099        | 11 | L  | 11 | 1501.7725      | 751.3902        | 501.2627        |
| 1331.7727      | 666.3903        | 444.5961        | 12 | Q  | 10 | 1388.6884      | 694.8481        | 463.5680        |
| 1459.8313      | 730.4196        | 487.2823        | 13 | Q  | 9  | 1260.6299      | 630.8188        | 420.8818        |
| 1720.9712      | 860.9895        | 574.3290        | 14 | C  | 8  | 1132.5713      | 566.7896        | 378.1956        |
| 1818.0240      | 909.5159        | 606.6799        | 15 | F  | 7  | 871.4314       | 436.2196        | 291.1490        |
| 1965.0924      | 983.0501        | 655.7027        | 16 | F  | 6  | 774.3786       | 387.6932        | 258.7981        |
| 2094.1350      | 1047.5714       | 698.7169        | 17 | E  | 5  | 627.3102       | 314.1590        | 209.7753        |
| 2209.1619      | 1105.0849       | 737.0592        | 18 | D  | 4  | 498.2676       | 249.6377        | 166.7611        |
| 2346.2208      | 1173.6143       | 782.7455        | 19 | H  | 3  | 383.2407       | 192.1243        | 128.4188        |
| 2445.2893      | 1223.1485       | 815.7683        | 20 | V  | 2  | 246.1818       | 123.5948        | 82.7325         |
|                |                 |                 | 21 | K  | 1  | 147.1134       | 74.0606         | 49.7097         |

C(14) : +261.14



X-range:

100 - 800

MassTol: Y-zoom:

0.950 1.00

ImageSize:

 Sm  Lg

MassType:

 AVG  MONO

Axis:

 1  2

Label:

 I  M  -

Ions:

a  +  2+  3+b  +  2+  3+c  +  2+  3+x  +  2+  3+y  +  2+  3+z  +  2+  3+hide H<sub>2</sub>O/NH<sub>3</sub> zoom 112-122 zoom 124-133 

GO

SLHTLFGDK, MH+ 1175.6676, m/z 392.5607  
10HNE-1HSA-Trypsin6-Orbit3.03026.03026.3.dta

scan 0; 6.7e+004

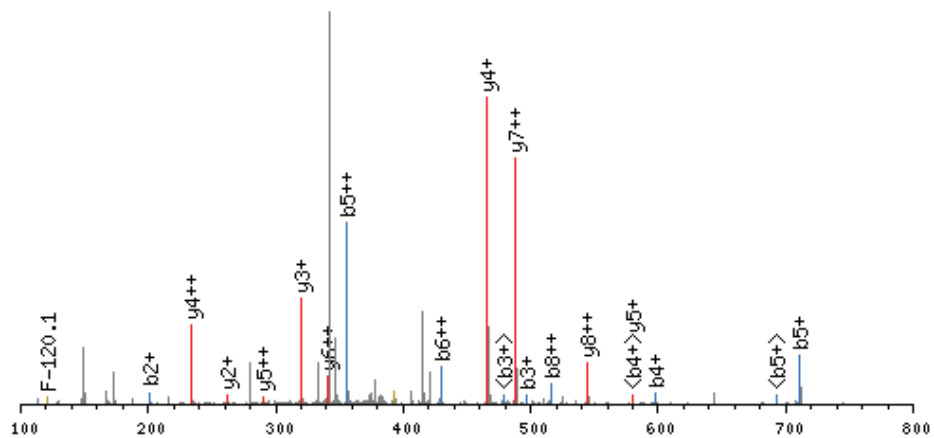

click image to zoom in; click top corners to zoom out

| b <sup>+</sup> | b <sup>2+</sup> | # | AA | # | y <sup>+</sup> | y <sup>2+</sup> | y <sup>3+</sup> |
|----------------|-----------------|---|----|---|----------------|-----------------|-----------------|
| 88.0399        | 44.5238         | 1 | S  | 9 |                |                 |                 |
| 201.1239       | 101.0659        | 2 | L  | 8 | 1088.6356      | 544.8217        | 363.5504        |
| 496.3135       | 248.6607        | 3 | H  | 7 | 975.5515       | 488.2797        | 325.8557        |
| 597.3612       | 299.1845        | 4 | T  | 6 | 680.3619       | 340.6849        | 227.4592        |
| 710.4453       | 355.7265        | 5 | L  | 5 | 579.3142       | 290.1610        | 193.7766        |
| 857.5137       | 429.2607        | 6 | F  | 4 | 466.2302       | 233.6190        | 156.0819        |
| 914.5351       | 457.7715        | 7 | G  | 3 | 319.1618       | 160.0848        | 107.0591        |
| 1029.5621      | 515.2849        | 8 | D  | 2 | 262.1403       | 131.5741        | 88.0520         |
|                |                 | 9 | K  | 1 | 147.1134       | 74.0606         | 49.7097         |

H(3): +295.19

X-range:

200 - 1700

MassTol: Y-zoom:

0.950 1.00

ImageSize:

 Sm  Lg

MassType:

 AVG  MONO

Axis:

 1  2

Label:

 I  M  -

Ions:

a  +  2+  3+b  +  2+  3+c  +  2+  3+x  +  2+  3+y  +  2+  3+z  +  2+  3+hide H<sub>2</sub>O/NH<sub>3</sub> zoom 112-122 zoom 124-133 

GO

RHPYFYAPELLFFAK, MH+ 2057.1264, m/z 686.3803  
10HNE-1HSA-Trypsin6-Orbit2.03830.03830.3.dta

scan 0; 8.0e+004

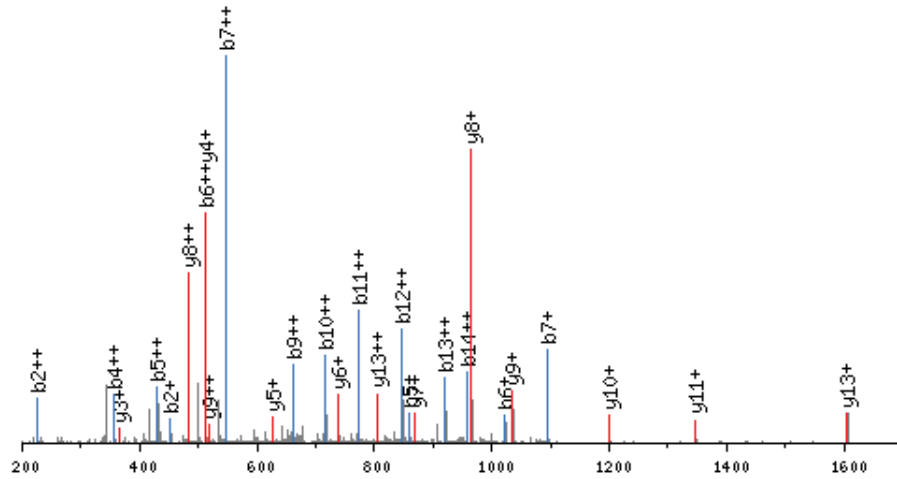

click image to zoom in; click top corners to zoom out

| b <sup>+</sup> | b <sup>2+</sup> | #  | AA | #  | y <sup>+</sup> | y <sup>2+</sup> | y <sup>3+</sup> |
|----------------|-----------------|----|----|----|----------------|-----------------|-----------------|
| 157.1089       | 79.0584         | 1  | R  | 15 |                |                 |                 |
| 452.2985       | 226.6532        | 2  | H  | 14 | 1901.0253      | 951.0166        | 634.3470        |
| 549.3513       | 275.1796        | 3  | P  | 13 | 1605.8357      | 803.4218        | 535.9505        |
| 712.4146       | 356.7112        | 4  | Y  | 12 | 1508.7830      | 754.8954        | 503.5995        |
| 859.4830       | 430.2454        | 5  | F  | 11 | 1345.7196      | 673.3637        | 449.2451        |
| 1022.5464      | 511.7771        | 6  | Y  | 10 | 1198.6512      | 599.8295        | 400.2223        |
| 1093.5835      | 547.2957        | 7  | A  | 9  | 1035.5879      | 518.2979        | 345.8678        |
| 1190.6362      | 595.8220        | 8  | P  | 8  | 964.5508       | 482.7793        | 322.1888        |
| 1319.6788      | 660.3433        | 9  | E  | 7  | 867.4980       | 434.2529        | 289.8379        |
| 1432.7629      | 716.8854        | 10 | L  | 6  | 738.4554       | 369.7316        | 246.8237        |
| 1545.8470      | 773.4274        | 11 | L  | 5  | 625.3714       | 313.1896        | 209.1290        |
| 1692.9154      | 846.9616        | 12 | F  | 4  | 512.2873       | 256.6476        | 171.4343        |
| 1839.9838      | 920.4958        | 13 | F  | 3  | 365.2189       | 183.1134        | 122.4115        |
| 1911.0209      | 956.0144        | 14 | A  | 2  | 218.1505       | 109.5791        | 73.3887         |
|                |                 | 15 | K  | 1  | 147.1134       | 74.0606         | 49.7097         |

H (2) : +295.19

X-range: 200 - 1000  
 MassTol: 0.950 Y-zoom: 1.00  
 ImageSize:  Sm  Lg  
 MassType:  AVG  MONO  
 Axis:  1  2  
 Label:  I  M  -  
 Ions: a  +  2+  3+  
 b  +  2+  3+  
 c  +  2+  3+  
 x  +  2+  3+  
 y  +  2+  3+  
 z  +  2+  3+  
 hide H<sub>2</sub>O/NH<sub>3</sub>   
 zoom 112-122   
 zoom 124-133   
 GO

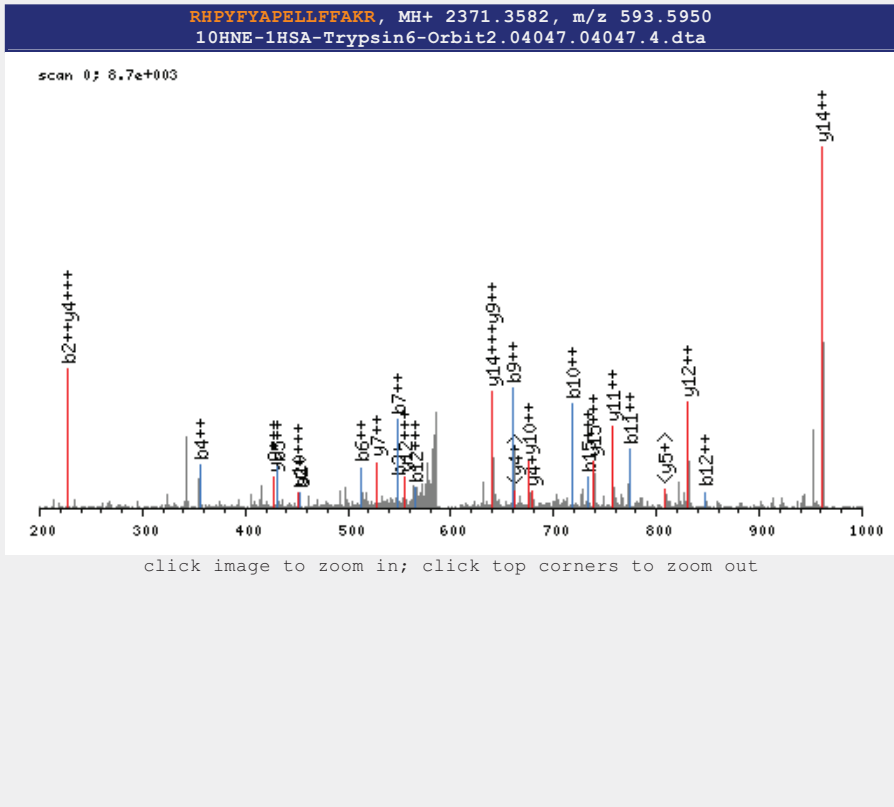

| b <sup>+</sup> | b <sup>2+</sup> | b <sup>3+</sup> | #  | AA | #  | y <sup>+</sup> | y <sup>2+</sup> | y <sup>3+</sup> |
|----------------|-----------------|-----------------|----|----|----|----------------|-----------------|-----------------|
| 157.1089       | 79.0584         | 53.0415         | 1  | R  | 16 |                |                 |                 |
| 452.2985       | 226.6532        | 151.4381        | 2  | H  | 15 | 2215.2571      | 1108.1325       | 739.0909        |
| 549.3513       | 275.1796        | 183.7890        | 3  | P  | 14 | 1920.0675      | 960.5377        | 640.6944        |
| 712.4146       | 356.7112        | 238.1434        | 4  | Y  | 13 | 1823.0148      | 912.0113        | 608.3435        |
| 859.4830       | 430.2454        | 287.1662        | 5  | F  | 12 | 1659.9514      | 830.4796        | 553.9890        |
| 1022.5464      | 511.7771        | 341.5207        | 6  | Y  | 11 | 1512.8830      | 756.9454        | 504.9662        |
| 1093.5835      | 547.2957        | 365.1997        | 7  | A  | 10 | 1349.8197      | 675.4138        | 450.6118        |
| 1190.6362      | 595.8220        | 397.5506        | 8  | F  | 9  | 1278.7826      | 639.8952        | 426.9327        |
| 1319.6788      | 660.3433        | 440.5648        | 9  | E  | 8  | 1181.7298      | 591.3688        | 394.5818        |
| 1432.7629      | 716.8854        | 478.2595        | 10 | L  | 7  | 1052.6872      | 526.8475        | 351.5676        |
| 1545.8470      | 773.4274        | 515.9542        | 11 | L  | 6  | 939.6031       | 470.3055        | 313.8729        |
| 1692.9154      | 846.9616        | 564.9770        | 12 | F  | 5  | 826.5191       | 413.7635        | 276.1782        |
| 1839.9838      | 920.4958        | 613.9998        | 13 | F  | 4  | 679.4507       | 340.2292        | 227.1554        |
| 1911.0209      | 956.0144        | 637.6789        | 14 | A  | 3  | 532.3823       | 266.6950        | 178.1326        |
| 2197.2465      | 1099.1272       | 733.0874        | 15 | K  | 2  | 461.3451       | 231.1765        | 154.4536        |
|                |                 |                 | 16 | R  | 1  | 175.1195       | 88.0637         | 59.0451         |

H(2):+295.19 K(15):+286.23

X-range:

200 - 1100

MassTol: Y-zoom:

0.950 1.00

ImageSize:

 Sm  Lg

MassType:

 AVG  MONO

Axis:

 1  2

Label:

 I  M  -

Ions:

a  +  2+  3+b  +  2+  3+c  +  2+  3+x  +  2+  3+y  +  2+  3+z  +  2+  3+hide H<sub>2</sub>O/NH<sub>3</sub> zoom 112-122 zoom 124-133 

GO

YKAAFTECCQADK, MH+ 1820.8564, m/z 607.6236  
10HNE-1HSA-Trypsin6-Orbit1.02272.02272.3.dta

scan 0; 6.8e+004

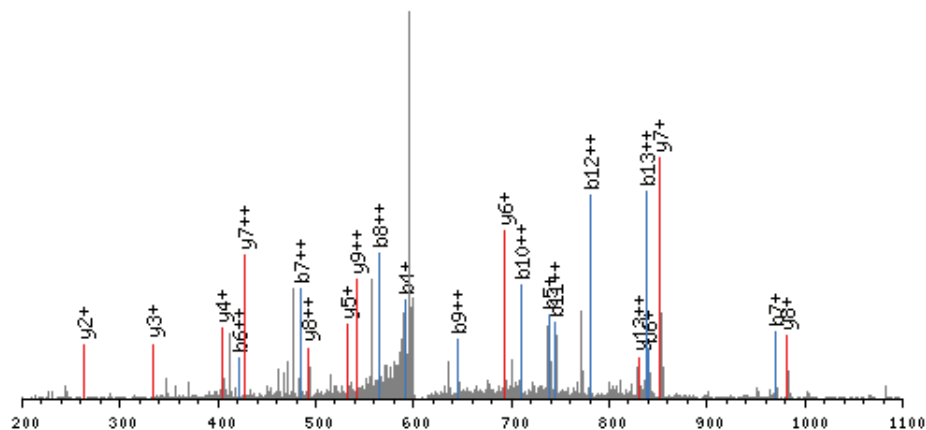

click image to zoom in; click top corners to zoom out

| b <sup>+</sup> | b <sup>2+</sup> | #  | AA | #  | y <sup>+</sup> | y <sup>2+</sup> | y <sup>3+</sup> |
|----------------|-----------------|----|----|----|----------------|-----------------|-----------------|
| 164.0712       | 82.5395         | 1  | Y  | 14 |                |                 |                 |
| 450.2968       | 225.6523        | 2  | K  | 13 | 1657.7930      | 829.4004        | 553.2696        |
| 521.3339       | 261.1709        | 3  | A  | 12 | 1371.5674      | 686.2876        | 457.8610        |
| 592.3710       | 296.6894        | 4  | A  | 11 | 1300.5303      | 650.7690        | 434.1820        |
| 739.4394       | 370.2236        | 5  | F  | 10 | 1229.4932      | 615.2505        | 410.5029        |
| 840.4871       | 420.7475        | 6  | T  | 9  | 1082.4247      | 541.7163        | 361.4801        |
| 969.5297       | 485.2688        | 7  | E  | 8  | 981.3771       | 491.1924        | 327.7976        |
| 1129.5604      | 565.2841        | 8  | C  | 7  | 852.3345       | 426.6711        | 284.7834        |
| 1289.5911      | 645.2995        | 9  | C  | 6  | 692.3038       | 346.6558        | 231.4398        |
| 1417.6497      | 709.3287        | 10 | Q  | 5  | 532.2731       | 266.6405        | 178.0963        |
| 1488.6868      | 744.8473        | 11 | A  | 4  | 404.2145       | 202.6112        | 135.4101        |
| 1559.7239      | 780.3659        | 12 | A  | 3  | 333.1774       | 167.0926        | 111.7310        |
| 1674.7508      | 837.8793        | 13 | D  | 2  | 262.1403       | 131.5741        | 88.0520         |
|                |                 | 14 | K  | 1  | 147.1134       | 74.0606         | 49.7097         |

K(2):+286.23 C(8):+160.03 C(9):+160.03

X-range:  -

MassTol:  Y-zoom:

ImageSize:  Sm  Lg

MassType:  AVG  MONO

Axis:  1  2

Label:  I  M  -

Ions: a  +  2+  3+  
 b  +  2+  3+  
 c  +  2+  3+  
 x  +  2+  3+  
 y  +  2+  3+  
 z  +  2+  3+

hide H<sub>2</sub>O/NH<sub>3</sub>

zoom 112-122

zoom 124-133

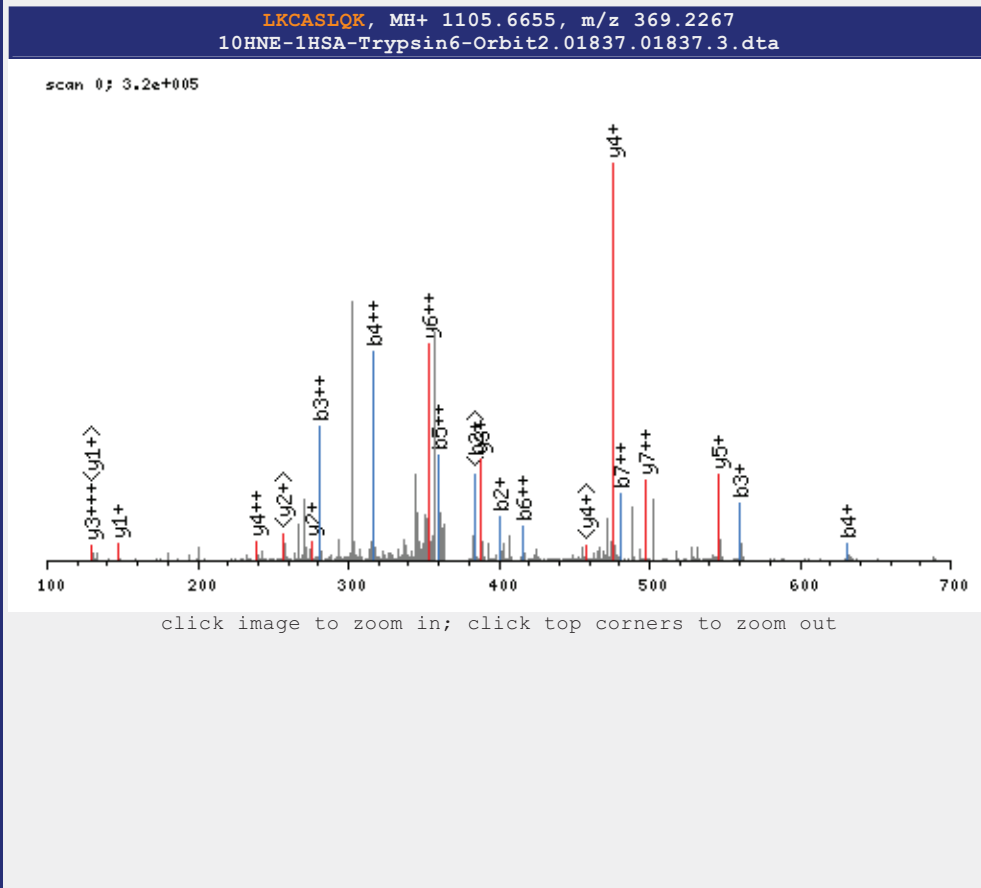

| b <sup>+</sup> | b <sup>2+</sup> | # | AA | # | y <sup>+</sup> | y <sup>2+</sup> | y <sup>3+</sup> |
|----------------|-----------------|---|----|---|----------------|-----------------|-----------------|
| 114.0919       | 57.5499         | 1 | L  | 8 |                |                 |                 |
| 400.3175       | 200.6627        | 2 | K  | 7 | 992.5815       | 496.7946        | 331.5324        |
| 560.3482       | 280.6780        | 3 | C  | 6 | 706.3558       | 353.6818        | 236.1238        |
| 631.3853       | 316.1966        | 4 | A  | 5 | 546.3251       | 273.6665        | 182.7803        |
| 718.4174       | 359.7126        | 5 | S  | 4 | 475.2880       | 238.1479        | 159.1012        |
| 831.5014       | 416.2546        | 6 | L  | 3 | 388.2560       | 194.6319        | 130.0905        |
| 959.5600       | 480.2839        | 7 | Q  | 2 | 275.1719       | 138.0899        | 92.3959         |
|                |                 | 8 | K  | 1 | 147.1134       | 74.0606         | 49.7097         |

K(2):+286.23 C(3):+160.03

X-range:

100 - 900

MassTol: Y-zoom:

0.950 1.00

ImageSize:

Sm  Lg

MassType:

AVG  MONO

Axis:

1  2

Label:

I  M  -

Ions:

a  +  2+  3+

b  +  2+  3+

c  +  2+  3+

x  +  2+  3+

y  +  2+  3+

z  +  2+  3+

hide H<sub>2</sub>O/NH<sub>3</sub>

zoom 112-122

zoom 124-133

GO

AFKAWAVAR, MH+ 1177.7097, m/z 393.2414  
10HNE-1HSA-Trypsin6-Orbit2.02804.02804.3.dta

scan 0; 4.2e+004

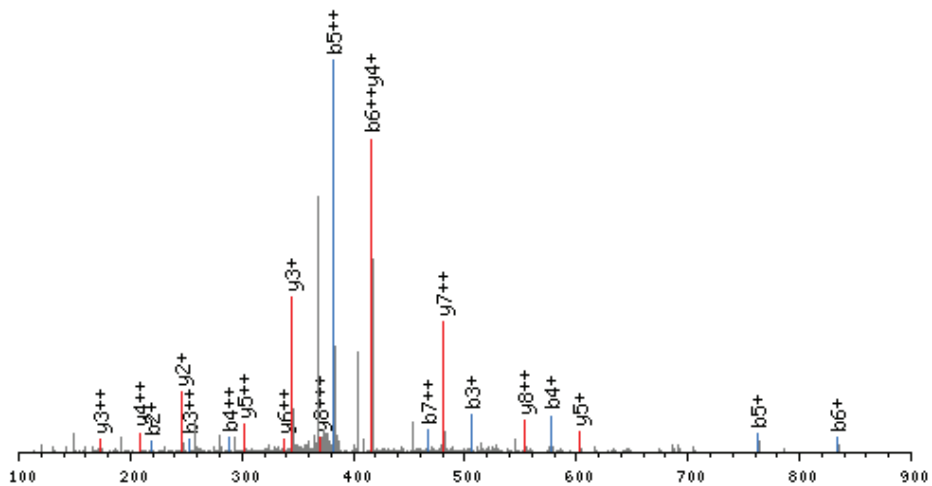

click image to zoom in; click top corners to zoom out

| b <sup>+</sup> | b <sup>2+</sup> | # | AA | # | y <sup>+</sup> | y <sup>2+</sup> | y <sup>3+</sup> |
|----------------|-----------------|---|----|---|----------------|-----------------|-----------------|
| 72.0449        | 36.5264         | 1 | A  | 9 |                |                 |                 |
| 219.1134       | 110.0606        | 2 | F  | 8 | 1106.6726      | 553.8402        | 369.5628        |
| 505.3390       | 253.1734        | 3 | K  | 7 | 959.6042       | 480.3060        | 320.5400        |
| 576.3761       | 288.6920        | 4 | A  | 6 | 673.3786       | 337.1932        | 225.1314        |
| 762.4554       | 381.7316        | 5 | W  | 5 | 602.3415       | 301.6746        | 201.4524        |
| 833.4925       | 417.2502        | 6 | A  | 4 | 416.2621       | 208.6350        | 139.4259        |
| 932.5610       | 466.7844        | 7 | V  | 3 | 345.2250       | 173.1164        | 115.7469        |
| 1003.5981      | 502.3029        | 8 | A  | 2 | 246.1566       | 123.5822        | 82.7241         |
|                |                 | 9 | R  | 1 | 175.1195       | 88.0637         | 59.0451         |

K(3) : +286.23

X-range:

500 - 1700

MassTol: Y-zoom:

0.950 1.00

ImageSize:

Sm  Lg

MassType:

AVG  MONO

Axis:

1  2

Label:

I  M  -

Ions:

a  +  2+  3+

b  +  2+  3+

c  +  2+  3+

x  +  2+  3+

y  +  2+  3+

z  +  2+  3+

hide H<sub>2</sub>O/NH<sub>3</sub>

zoom 112-122

zoom 124-133

GO

SHCIAEVENDEMPADLPSLAADFVESK, MH+ 3132.4757, m/z 1044.8301  
10HNE-1HSA-Trypsin6-Orbit2.03858.03858.3.dta

scan 0; 2.4e+004

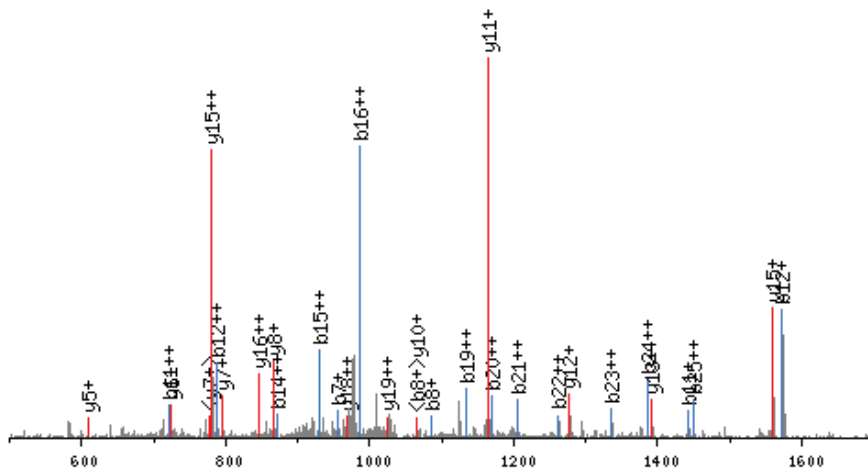

click image to zoom in; click top corners to zoom out

| b <sup>+</sup> | b <sup>2+</sup> | #  | AA | #  | y <sup>+</sup> | y <sup>2+</sup> | y <sup>3+</sup> |
|----------------|-----------------|----|----|----|----------------|-----------------|-----------------|
| 88.0399        | 44.5238         | 1  | S  | 27 |                |                 |                 |
| 383.2294       | 192.1186        | 2  | H  | 26 | 3045.4437      | 1523.2258       | 1015.8198       |
| 543.2601       | 272.1340        | 3  | C  | 25 | 2750.2541      | 1375.6310       | 917.4233        |
| 656.3442       | 328.6760        | 4  | I  | 24 | 2590.2234      | 1295.6156       | 864.0797        |
| 727.3813       | 364.1946        | 5  | A  | 23 | 2477.1394      | 1239.0736       | 826.3850        |
| 856.4239       | 428.7159        | 6  | E  | 22 | 2406.1023      | 1203.5550       | 802.7060        |
| 955.4923       | 478.2501        | 7  | V  | 21 | 2277.0597      | 1139.0337       | 759.6918        |
| 1084.5349      | 542.7714        | 8  | E  | 20 | 2177.9913      | 1089.4995       | 726.6690        |
| 1198.5778      | 599.7928        | 9  | N  | 19 | 2048.9487      | 1024.9782       | 683.6548        |
| 1313.6048      | 657.3063        | 10 | D  | 18 | 1934.9057      | 967.9568        | 645.6405        |
| 1442.6474      | 721.8276        | 11 | E  | 17 | 1819.8788      | 910.4433        | 607.2981        |
| 1573.6879      | 787.3478        | 12 | M  | 16 | 1690.8362      | 845.9220        | 564.2839        |
| 1670.7406      | 835.8742        | 13 | P  | 15 | 1559.7957      | 780.4018        | 520.6038        |
| 1741.7777      | 871.3928        | 14 | A  | 14 | 1462.7430      | 731.8754        | 488.2529        |
| 1856.8047      | 928.9063        | 15 | D  | 13 | 1391.7058      | 696.3568        | 464.5738        |
| 1969.8887      | 985.4483        | 16 | L  | 12 | 1276.6789      | 638.8434        | 426.2315        |
| 2066.9415      | 1033.9747       | 17 | P  | 11 | 1163.5948      | 582.3013        | 388.5368        |
| 2153.9735      | 1077.4907       | 18 | S  | 10 | 1066.5421      | 533.7749        | 356.1859        |
| 2267.0576      | 1134.0327       | 19 | L  | 9  | 979.5100       | 490.2589        | 327.1752        |
| 2338.0947      | 1169.5513       | 20 | A  | 8  | 866.4260       | 433.7169        | 289.4805        |
| 2409.1318      | 1205.0698       | 21 | A  | 7  | 795.3889       | 398.1983        | 265.8015        |
| 2524.1588      | 1262.5833       | 22 | D  | 6  | 724.3517       | 362.6798        | 242.1225        |
| 2671.2272      | 1336.1175       | 23 | F  | 5  | 609.3248       | 305.1663        | 203.7802        |
| 2770.2956      | 1385.6517       | 24 | V  | 4  | 462.2564       | 231.6321        | 154.7573        |
| 2899.3382      | 1450.1730       | 25 | E  | 3  | 363.1880       | 182.0979        | 121.7345        |
| 2986.3702      | 1493.6890       | 26 | S  | 2  | 234.1454       | 117.5766        | 78.7203         |
|                |                 | 27 | K  | 1  | 147.1134       | 74.0606         | 49.7097         |

H(2):+295.19 C(3):+160.03





X-range:

200 - 1200

MassTol: Y-zoom:

0.950 1.00

ImageSize:

Sm  Lg

MassType:

AVG  MONO

Axis:

1  2

Label:

I  M  -

Ions:

a  +  2+  3+

b  +  2+  3+

c  +  2+  3+

x  +  2+  3+

y  +  2+  3+

z  +  2+  3+

hide H<sub>2</sub>O/NH<sub>3</sub>

zoom 112-122

zoom 124-133

GO

RHPDYSVLLLR, MH+ 1625.9743, m/z 542.6629  
10HNE-1HSA-Trypsin6-Orbit3.03322.03322.3.dta

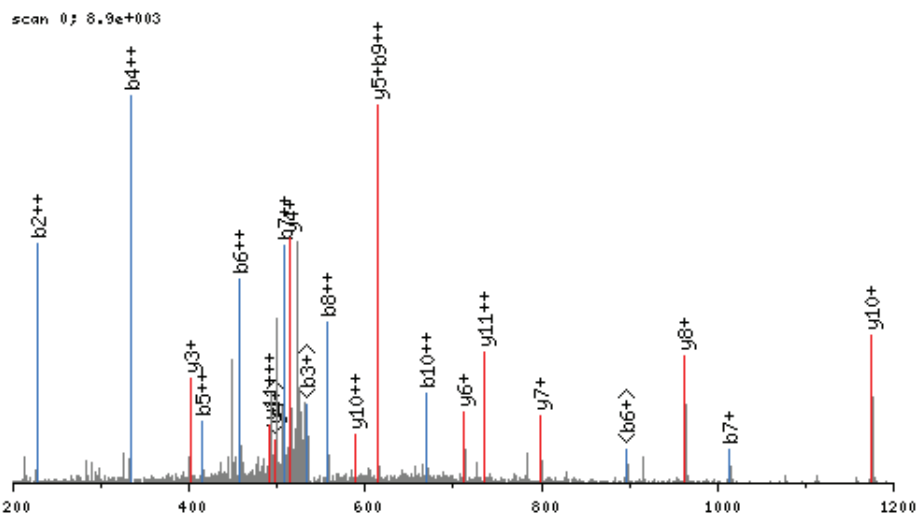

click image to zoom in; click top corners to zoom out

| b <sup>+</sup> | b <sup>2+</sup> | #  | AA | #  | y <sup>+</sup> | y <sup>2+</sup> | y <sup>3+</sup> |
|----------------|-----------------|----|----|----|----------------|-----------------|-----------------|
| 157.1089       | 79.0584         | 1  | R  | 12 |                |                 |                 |
| 452.2985       | 226.6532        | 2  | H  | 11 | 1469.8732      | 735.4405        | 490.6296        |
| 549.3513       | 275.1796        | 3  | P  | 10 | 1174.6836      | 587.8457        | 392.2331        |
| 664.3782       | 332.6930        | 4  | D  | 9  | 1077.6308      | 539.3193        | 359.8822        |
| 827.4416       | 414.2247        | 5  | Y  | 8  | 962.6039       | 481.8059        | 321.5398        |
| 914.4736       | 457.7407        | 6  | S  | 7  | 799.5405       | 400.2742        | 267.1854        |
| 1013.5420      | 507.2749        | 7  | V  | 6  | 712.5085       | 356.7582        | 238.1747        |
| 1112.6104      | 556.8091        | 8  | V  | 5  | 613.4401       | 307.2240        | 205.1519        |
| 1225.6945      | 613.3512        | 9  | L  | 4  | 514.3717       | 257.6898        | 172.1291        |
| 1338.7785      | 669.8932        | 10 | L  | 3  | 401.2876       | 201.1477        | 134.4344        |
| 1451.8626      | 726.4352        | 11 | L  | 2  | 288.2036       | 144.6057        | 96.7397         |
|                |                 | 12 | R  | 1  | 175.1195       | 88.0637         | 59.0451         |

H (2) : +295.19

X-range:

300 - 1400

MassTol: Y-zoom:

0.950 1.00

ImageSize:

Sm  Lg

MassType:

AVG  MONO

Axis:

1  2

Label:

I  M  -

Ions:

a  +  2+  3+

b  +  2+  3+

c  +  2+  3+

x  +  2+  3+

y  +  2+  3+

z  +  2+  3+

hide H<sub>2</sub>O/NH<sub>3</sub>

zoom 112-122

zoom 124-133

GO

ONCELFQQLGEYKFNALLVR, MH+ 2757.4286, m/z 919.8144  
10HNE-1HSA-Trypsin6-Orbit2.03895.03895.3.dta

scan 0; 2.8e+004

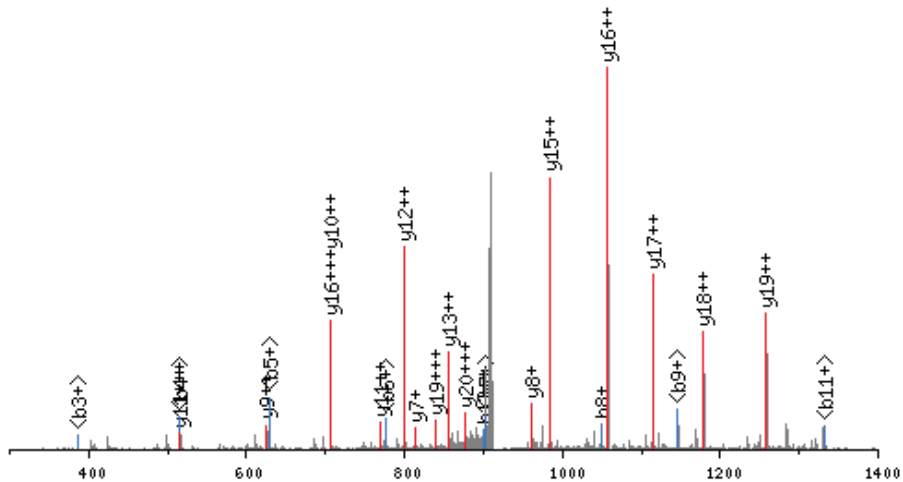

click image to zoom in; click top corners to zoom out

| b <sup>+</sup> | b <sup>2+</sup> | #  | AA | #  | y <sup>+</sup> | y <sup>2+</sup> | y <sup>3+</sup> |
|----------------|-----------------|----|----|----|----------------|-----------------|-----------------|
| 129.0664       | 65.0371         | 1  | Q  | 21 |                |                 |                 |
| 243.1093       | 122.0586        | 2  | N  | 20 | 2629.3700      | 1315.1889       | 877.1286        |
| 403.1400       | 202.0739        | 3  | C  | 19 | 2515.3271      | 1258.1675       | 839.1142        |
| 532.1826       | 266.5952        | 4  | E  | 18 | 2355.2964      | 1178.1521       | 785.7707        |
| 645.2667       | 323.1372        | 5  | L  | 17 | 2226.2538      | 1113.6308       | 742.7565        |
| 792.3351       | 396.6715        | 6  | F  | 16 | 2113.1698      | 1057.0888       | 705.0618        |
| 921.3777       | 461.1928        | 7  | E  | 15 | 1966.1013      | 983.5546        | 656.0390        |
| 1049.4363      | 525.2220        | 8  | Q  | 14 | 1837.0587      | 919.0333        | 613.0248        |
| 1162.5203      | 581.7641        | 9  | L  | 13 | 1709.0002      | 855.0040        | 570.3386        |
| 1219.5418      | 610.2748        | 10 | G  | 12 | 1595.9161      | 798.4620        | 532.6439        |
| 1348.5844      | 674.7961        | 11 | E  | 11 | 1538.8946      | 769.9512        | 513.6368        |
| 1511.6477      | 756.3278        | 12 | Y  | 10 | 1409.8520      | 705.4299        | 470.6226        |
| 1797.8733      | 899.4406        | 13 | K  | 9  | 1246.7887      | 623.8983        | 416.2681        |
| 1944.9418      | 972.9748        | 14 | F  | 8  | 960.5631       | 480.7855        | 320.8596        |
| 2073.0003      | 1037.0041       | 15 | Q  | 7  | 813.4947       | 407.2512        | 271.8368        |
| 2187.0433      | 1094.0255       | 16 | N  | 6  | 685.4361       | 343.2220        | 229.1506        |
| 2258.0804      | 1129.5441       | 17 | A  | 5  | 571.3932       | 286.2005        | 191.1363        |
| 2371.1644      | 1186.0861       | 18 | L  | 4  | 500.3560       | 250.6819        | 167.4572        |
| 2484.2485      | 1242.6282       | 19 | L  | 3  | 387.2720       | 194.1399        | 129.7625        |
| 2583.3169      | 1292.1624       | 20 | V  | 2  | 274.1879       | 137.5979        | 92.0679         |
|                |                 | 21 | R  | 1  | 175.1195       | 88.0637         | 59.0451         |

C (3) :+160.03 K (13) :+286.23



X-range:

300 - 1100

MassTol: Y-zoom:

0.950 3.00

ImageSize:

Sm  Lg

MassType:

AVG  MONO

Axis:

1  2

Label:

I  M  -

Ions:

a  +  2+  3+

b  +  2+  3+

c  +  2+  3+

x  +  2+  3+

y  +  2+  3+

z  +  2+  3+

hide H<sub>2</sub>O/NH<sub>3</sub>

zoom 112-122

zoom 124-133

GO

KVPQVSTPLVEVSR, MH+ 1780.0584, m/z 594.0243  
10HNE-1HSA-Trypsin6-Orbit1.02940.02940.3.dta

scan 0; 3.6e+004

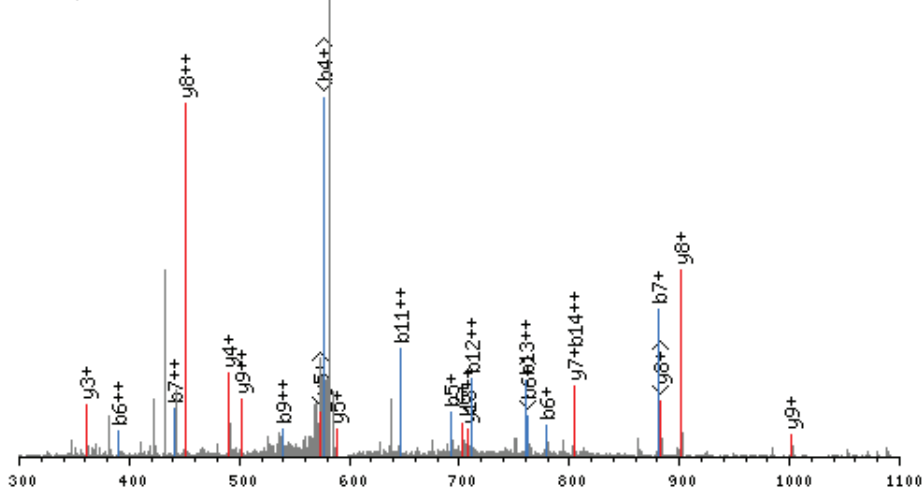

click image to zoom in; click top corners to zoom out

| b <sup>+</sup> | b <sup>2+</sup> | #  | AA | #  | y <sup>+</sup> | y <sup>2+</sup> | y <sup>3+</sup> |
|----------------|-----------------|----|----|----|----------------|-----------------|-----------------|
| 269.2229       | 135.1154        | 1  | K  | 15 |                |                 |                 |
| 368.2913       | 184.6496        | 2  | V  | 14 | 1511.8433      | 756.4256        | 504.6197        |
| 465.3441       | 233.1760        | 3  | P  | 13 | 1412.7749      | 706.8914        | 471.5969        |
| 593.4027       | 297.2052        | 4  | Q  | 12 | 1315.7222      | 658.3650        | 439.2459        |
| 692.4711       | 346.7394        | 5  | V  | 11 | 1187.6636      | 594.3357        | 396.5597        |
| 779.5031       | 390.2555        | 6  | S  | 10 | 1088.5952      | 544.8015        | 363.5369        |
| 880.5508       | 440.7793        | 7  | T  | 9  | 1001.5631      | 501.2855        | 334.5263        |
| 977.6035       | 489.3057        | 8  | P  | 8  | 900.5155       | 450.7616        | 300.8437        |
| 1078.6512      | 539.8295        | 9  | T  | 7  | 803.4627       | 402.2353        | 268.4928        |
| 1191.7353      | 596.3716        | 10 | L  | 6  | 702.4150       | 351.7114        | 234.8102        |
| 1290.8037      | 645.9058        | 11 | V  | 5  | 589.3310       | 295.1694        | 197.1155        |
| 1419.8463      | 710.4271        | 12 | E  | 4  | 490.2625       | 245.6352        | 164.0927        |
| 1518.9147      | 759.9613        | 13 | V  | 3  | 361.2199       | 181.1139        | 121.0785        |
| 1605.9467      | 803.4773        | 14 | S  | 2  | 262.1515       | 131.5797        | 88.0557         |
|                |                 | 15 | R  | 1  | 175.1195       | 88.0637         | 59.0451         |

K(1):+268.22

X-range:

200 - 800

MassTol: Y-zoom:

0.950 1.00

ImageSize:

Sm  Lg

MassType:

AVG  MONO

Axis:

1  2

Label:

I  M  -

Ions:

a  +  2+  3+

b  +  2+  3+

c  +  2+  3+

x  +  2+  3+

y  +  2+  3+

z  +  2+  3+

hide H<sub>2</sub>O/NH<sub>3</sub>

zoom 112-122

zoom 124-133

GO

KQTALVELVK, MH+ 1286.8299, m/z 429.6148  
10HNE-1HSA-Trypsin6-Orbit1.02905.02905.3.dta

scan 0; 7.6e+04

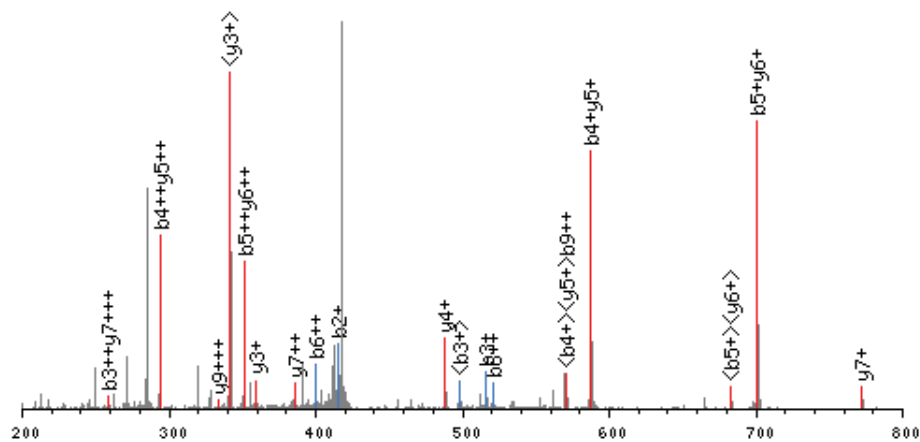

click image to zoom in; click top corners to zoom out

| b <sup>+</sup> | b <sup>2+</sup> | #  | AA | #  | y <sup>+</sup> | y <sup>2+</sup> | y <sup>3+</sup> |
|----------------|-----------------|----|----|----|----------------|-----------------|-----------------|
| 287.2335       | 144.1206        | 1  | K  | 10 |                |                 |                 |
| 415.2920       | 208.1499        | 2  | Q  | 9  | 1000.6043      | 500.8060        | 334.2066        |
| 516.3397       | 258.6738        | 3  | T  | 8  | 872.5457       | 436.7768        | 291.5204        |
| 587.3768       | 294.1923        | 4  | A  | 7  | 771.4980       | 386.2529        | 257.8379        |
| 700.4609       | 350.7344        | 5  | L  | 6  | 700.4609       | 350.7344        | 234.1589        |
| 799.5293       | 400.2686        | 6  | V  | 5  | 587.3768       | 294.1923        | 196.4642        |
| 928.5719       | 464.7899        | 7  | E  | 4  | 488.3084       | 244.6581        | 163.4414        |
| 1041.6560      | 521.3319        | 8  | L  | 3  | 359.2658       | 180.1368        | 120.4272        |
| 1140.7244      | 570.8661        | 9  | V  | 2  | 246.1818       | 123.5948        | 82.7325         |
|                |                 | 10 | K  | 1  | 147.1134       | 74.0606         | 49.7097         |

K(1) : +286.23

X-range:

100 - 800

MassTol: Y-zoom:

0.950 1.00

ImageSize:

 Sm  Lg

MassType:

 AVG  MONO

Axis:

 1  2

Label:

 I  M  -

Ions:

a  +  2+  3+b  +  2+  3+c  +  2+  3+x  +  2+  3+y  +  2+  3+z  +  2+  3+hide H<sub>2</sub>O/NH<sub>3</sub> zoom 112-122 zoom 124-133 

GO

KQTALVELVK, MH+ 1268.8193, m/z 423.6113  
10HNE-1HSA-Trypsin6-Orbit3.02993.02993.3.dta

scan 0; 1.4e+005

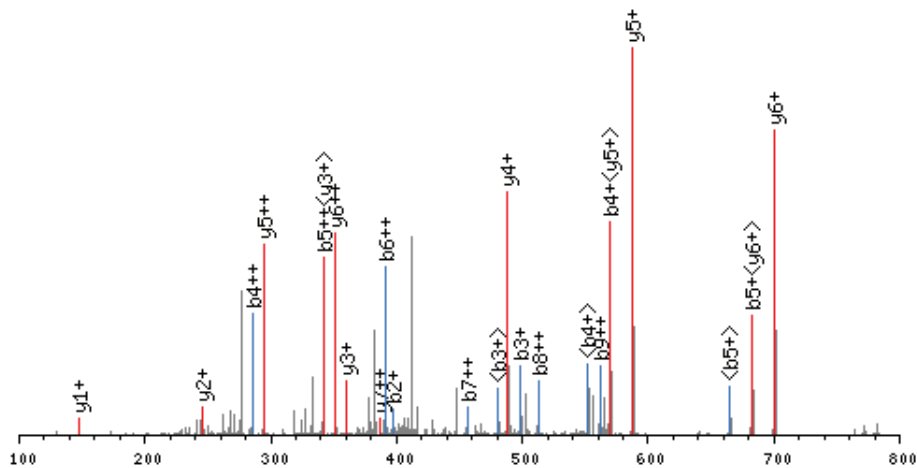

click image to zoom in; click top corners to zoom out

| b <sup>+</sup> | b <sup>2+</sup> | #  | AA | #  | y <sup>+</sup> | y <sup>2+</sup> | y <sup>3+</sup> |
|----------------|-----------------|----|----|----|----------------|-----------------|-----------------|
| 269.2229       | 135.1154        | 1  | K  | 10 |                |                 |                 |
| 397.2815       | 199.1447        | 2  | Q  | 9  | 1000.6043      | 500.8060        | 334.2066        |
| 498.3292       | 249.6685        | 3  | T  | 8  | 872.5457       | 436.7768        | 291.5204        |
| 569.3663       | 285.1870        | 4  | A  | 7  | 771.4980       | 386.2529        | 257.8379        |
| 682.4503       | 341.7291        | 5  | L  | 6  | 700.4609       | 350.7344        | 234.1589        |
| 781.5188       | 391.2633        | 6  | V  | 5  | 587.3768       | 294.1923        | 196.4642        |
| 910.5613       | 455.7846        | 7  | E  | 4  | 488.3084       | 244.6581        | 163.4414        |
| 1023.6454      | 512.3266        | 8  | L  | 3  | 359.2658       | 180.1368        | 120.4272        |
| 1122.7138      | 561.8608        | 9  | V  | 2  | 246.1818       | 123.5948        | 82.7325         |
|                |                 | 10 | K  | 1  | 147.1134       | 74.0606         | 49.7097         |

K(1) : +268.22

X-range:

200 - 1300

MassTol: Y-zoom:

0.950 1.00

ImageSize:

Sm  Lg

MassType:

AVG  MONO

Axis:

1  2

Label:

I  M  -

Ions:

a  +  2+  3+

b  +  2+  3+

c  +  2+  3+

x  +  2+  3+

y  +  2+  3+

z  +  2+  3+

hide H<sub>2</sub>O/NH<sub>3</sub>

zoom 112-122

zoom 124-133

GO

**EQLKAVMDDFAAFVEK**, MH+ 1999.0462, m/z 667.0202  
10HNE-1HSA-Trypsin6-Orbit1.03946.03946.3.dta

scan 0; 8.4e+003

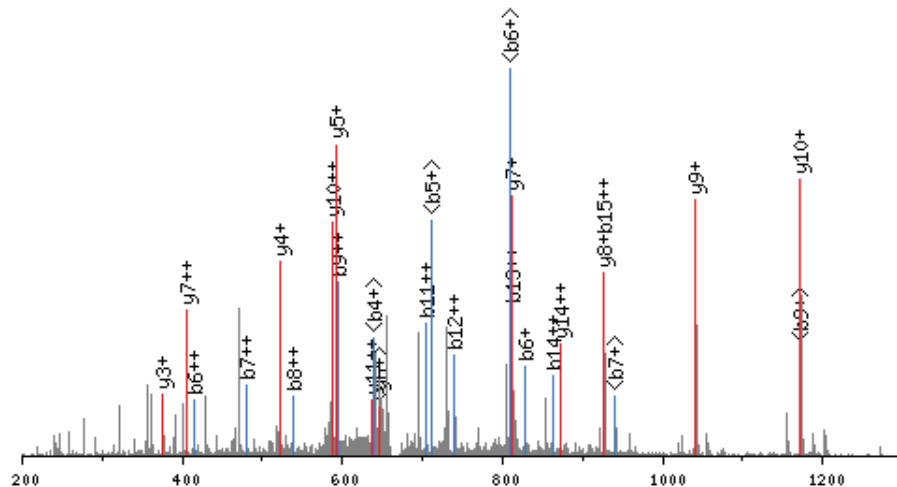

click image to zoom in; click top corners to zoom out

| b <sup>+</sup> | b <sup>2+</sup> | #  | AA | #  | y <sup>+</sup> | y <sup>2+</sup> | y <sup>3+</sup> |
|----------------|-----------------|----|----|----|----------------|-----------------|-----------------|
| 130.0504       | 65.5291         | 1  | E  | 16 |                |                 |                 |
| 258.1090       | 129.5584        | 2  | Q  | 15 | 1870.0036      | 935.5057        | 624.0064        |
| 371.1931       | 186.1004        | 3  | L  | 14 | 1741.9450      | 871.4764        | 581.3202        |
| 657.4187       | 329.2133        | 4  | K  | 13 | 1628.8610      | 814.9344        | 543.6255        |
| 728.4558       | 364.7318        | 5  | A  | 12 | 1342.6353      | 671.8216        | 448.2170        |
| 827.5242       | 414.2660        | 6  | V  | 11 | 1271.5982      | 636.3030        | 424.5380        |
| 958.5647       | 479.7863        | 7  | M  | 10 | 1172.5298      | 586.7688        | 391.5151        |
| 1073.5917      | 537.2997        | 8  | D  | 9  | 1041.4893      | 521.2486        | 347.8350        |
| 1188.6186      | 594.8132        | 9  | D  | 8  | 926.4624       | 463.7351        | 309.4927        |
| 1335.6870      | 668.3474        | 10 | F  | 7  | 811.4354       | 406.2216        | 271.1504        |
| 1406.7241      | 703.8660        | 11 | A  | 6  | 664.3670       | 332.6874        | 222.1276        |
| 1477.7612      | 739.3845        | 12 | A  | 5  | 593.3299       | 297.1689        | 198.4485        |
| 1624.8297      | 812.9187        | 13 | F  | 4  | 522.2928       | 261.6503        | 174.7695        |
| 1723.8981      | 862.4529        | 14 | V  | 3  | 375.2244       | 188.1161        | 125.7467        |
| 1852.9407      | 926.9742        | 15 | E  | 2  | 276.1559       | 138.5819        | 92.7239         |
|                |                 | 16 | K  | 1  | 147.1134       | 74.0606         | 49.7097         |

K(4):+286.23
